# Supplementary material for: Advancing the science of health research capacity strengthening in low-income and middle-income countries: a scoping review of the published literature, 2000–2016
Source: PubMed Central journal article supplement — BMJ Open. 2017 Dec 6;7(12):e018718. doi: 10.1136/bmjopen-2017-018718 (PMC5728300; doi:10.1136/bmjopen-2017-018718), 2017-12-06
Supplement: bmjopen-2017-018718.draft_revisions.pdf [file bmjopen-2017-018718.draft_revisions.pdf]

# BMJ Open

BMJ Open is committed to open peer review. As part of this commitment we make the peer review history of every article we publish publicly available.

When an article is published we post the peer reviewers' comments and the authors' responses online. We also post the versions of the paper that were used during peer review. These are the versions that the peer review comments apply to.

The versions of the paper that follow are the versions that were submitted during the peer review process. They are not the versions of record or the final published versions. They should not be cited or distributed as the published version of this manuscript.

BMJ Open is an open access journal and the full, final, typeset and author-corrected version of record of the manuscript is available on our site with no access controls, subscription charges or pay-per-view fees (<http://bmjopen.bmj.com>).

If you have any questions on BMJ Open's open peer review process please email [editorial.bmjopen@bmj.com](mailto:editorial.bmjopen@bmj.com)

# BMJ Open

## Advancing the science of health research capacity strengthening in low- and middle-income countries: A scoping review of the published literature, 2000-2016.

|                                                                                                                                                                |                                                                                                                                                                                                                                                                                                                              |
|----------------------------------------------------------------------------------------------------------------------------------------------------------------|------------------------------------------------------------------------------------------------------------------------------------------------------------------------------------------------------------------------------------------------------------------------------------------------------------------------------|
| Journal:                                                                                                                                                       | <i>BMJ Open</i>                                                                                                                                                                                                                                                                                                              |
| Manuscript ID                                                                                                                                                  | bmjopen-2017-018718                                                                                                                                                                                                                                                                                                          |
| Article Type:                                                                                                                                                  | Research                                                                                                                                                                                                                                                                                                                     |
| Date Submitted by the Author:                                                                                                                                  | 17-Jul-2017                                                                                                                                                                                                                                                                                                                  |
| Complete List of Authors:                                                                                                                                      | Dean, Laura; Liverpool School of Tropical Medicine, Department of International Public Health<br>Gregorius, Stefanie; Liverpool School of Tropical Medicine, Department of International Public Health<br>bates, imelda<br>Pulford, Justin; Liverpool School of Tropical Medicine, Department of International Public Health |
| <b>Primary Subject Heading</b>:                                                                                                                                | Global health                                                                                                                                                                                                                                                                                                                |
| Secondary Subject Heading:                                                                                                                                     | Evidence based practice                                                                                                                                                                                                                                                                                                      |
| Keywords:                                                                                                                                                      | Capacity Strengthening, LMIC, Scoping Review                                                                                                                                                                                                                                                                                 |
| <p>Note: The following files were submitted by the author for peer review, but cannot be converted to PDF. You must view these files (e.g. movies) online.</p> |                                                                                                                                                                                                                                                                                                                              |
| Supplementary Tables 2-8.ods                                                                                                                                   |                                                                                                                                                                                                                                                                                                                              |

SCHOLARONE™  
Manuscripts

1  
2  
3 **Title: Advancing the science of health research capacity strengthening in low- and middle-income**  
4  
5 **countries: A scoping review of the published literature, 2000-2016**  
6  
7

8  
9 **Authors:**

10  
11 Laura Dean<sup>1a</sup>

12  
13 Stefanie Gregorius<sup>1</sup>

14  
15 Imelda Bates<sup>1</sup>

16  
17 Justin Pulford<sup>1</sup>

18  
19  
20  
21  
22 1. Department of International Public Health, Capacity Research Unit, Liverpool School of Tropical  
23  
24 Medicine, Pembroke Place, Liverpool, L3 5QA, UK.  
25  
26

27  
28  
29 <sup>a</sup> Corresponding Author: [laura.dean@lstm.ac.uk](mailto:laura.dean@lstm.ac.uk) Tel: 01517053793  
30  
31

32  
33 Key Words: LMIC, Capacity Strengthening, Scoping Review

34  
35 Word Count: 5721  
36  
37  
38  
39  
40  
41  
42  
43  
44  
45  
46  
47  
48  
49  
50  
51  
52  
53  
54  
55  
56  
57  
58  
59  
60

## Abstract

**Objectives:** Substantial development assistance and research funding are invested in health research capacity strengthening (HRCS) interventions in many low- and middle-income countries, yet the effectiveness, impact and value for money of these investments is not well understood. Arguably, the major constraint to evidence-informed HRCS intervention has been the disparate nature of the research effort to date. This review aims to map and critically analyse the existing HRCS effort to better understand the level, type, cohesion and conceptual sophistication of the current evidence base.

**Methods:** We utilised a scoping review methodology to develop standardised search terms to identify empirical and theoretical HRCS literature within the following databases: PubMed, Global Health, and Scopus. HRCS publications available in English between the period 2000-2016 were included. 1195 articles were retrieved of which 172 met the final inclusion criteria. A-priori thematic analysis of all included articles was completed. Content analysis of identified HRCS definitions was also conducted.

**Results:** The number of HRCS publications has increased exponentially between 2000 and 2016. Most publications during this period have been perspective, opinion or commentary pieces, however publications presenting original research findings have been the primary publication type since 2013. Three comprehensive definitions that explicitly align with current HRCS guidelines were evident, although all three pertain to the broader notion of 'research capacity' strengthening.

**Conclusions:** The review findings indicate a HRCS research field with a focus on implementation science is emerging, although the conceptual and empirical bases are not yet sufficiently advanced to effectively inform HRCS programme planning. Consolidating a HRCS implementation science therefore presents as a viable option that may accelerate the development of a useful evidence-base to inform HRCS programme planning. Identifying an agreed operational definition of HRCS,

1  
2  
3 standardising HRCS-related terminology, developing a needs-based HRCS-specific research agenda  
4  
5 and synthesising currently available evidence may be useful first steps.  
6  
7  
8

### 9 **Strengths and Limitations of the Study**

- 11 • This scoping review brings together various studies and reviews focused on HRCS to provide  
12 the impetus and direction for a dedicated HRCS implementation science to emerge and to  
13 foster a common identity for HRCS researchers.  
14
- 15 • This review critically analysed current definitions of HRCS to contribute toward the  
16 identification of a consolidated, evidence based, operational definition of HRCS on which  
17 future HRCS interventions and evaluations can be based.  
18
- 19 • Some articles published in non-Anglophone journals, in non-health related journals, or in a  
20 lexicon outside of the key word terms employed herein would not have been retrieved by  
21 the search methodology.  
22
- 23 • Relevant work that remains unpublished, published outside of academic peer-reviewed  
24 journals or published prior to 2000 would also have been omitted.  
25
- 26 • The review did not critically examine the quality of the research effort (in original research  
27 publications) or analyse the output (findings) of the collective research effort.  
28  
29  
30  
31  
32  
33  
34  
35  
36  
37  
38  
39  
40  
41  
42  
43  
44  
45  
46  
47  
48  
49  
50  
51  
52  
53  
54  
55  
56  
57  
58  
59  
60

## Introduction

Health research capacity in many low- and middle-income countries (LMICs) is poor<sup>1-4</sup>, undermining LMIC ability to identify and respond to local health needs or to equitably participate in the international response to global health challenges. Numerous health research capacity strengthening (HRCS) interventions have been employed in LMICs ranging from simple training programmes to currently advocated 'systems' approaches that focus on developing the capacity of individual researchers, research institutions and the wider research environment<sup>5-7</sup>. The international research community has a dual role in LMIC HRCS. The first role is that of a HRCS *implementer* and centres on the transfer of expertise in specialist subject areas pertinent to LMIC health research priorities, typically from higher- to lower-capacitated individuals or organisations and may be facilitated through such mechanisms as scholarship schemes, technical assistance, research networks or research consortia. The second role is that of an HRCS *scientist* and centres on the creation of robust theory and evidence to inform optimal HRCS interventions. Here, the researcher is not an expert in the subject matter of a specific HRCS intervention (e.g. increasing capacity in operational research to support national malaria control programmes), but is concerned with providing the evidence-base to inform HRCS funders and implementing partners how their respective programme goals may best be achieved (e.g. what investments would produce the greatest, most sustainable gain in operational research capacity to support a national malaria control programme).

The extent to which the research community is fulfilling this latter role (i.e. HRCS scientist), as compared to the former role (i.e. HRCS implementer), is questionable at present. A recent paper described the existing HRCS evidence-base as 'confusing, controversial and poorly defined'<sup>8</sup> despite a long recognised need to support HRCS in LMICs<sup>9</sup>. Fundamental questions remain largely unanswered such as; how to reliably assess existing capacities at different levels of a health research

1  
2  
3 system; which interventions facilitate sustainable capacity gains in which circumstances; and which  
4  
5 capacity term (building, strengthening or development) is the most nuanced and appropriate to  
6  
7 reflect developmental discourse and baseline capacities<sup>10</sup>. The international research community is  
8  
9 therefore in the awkward position of being a highly active participant in the transfer of scientific  
10  
11 theory and method within the context of subject-specific HRCS interventions, yet largely inactive in  
12  
13 rigorously applying scientific theory and method to the HRCS process.  
14  
15

16  
17  
18 The paucity of evidence available to inform HRCS implementation reflects, in part, the difficulties in  
19  
20 measuring an inherently multi-faceted, long-term, continuous process (i.e. HRCS) subject to a  
21  
22 diverse range of influences and assumptions. A greater constraint has been the sparse and disparate  
23  
24 nature of the HRCS-related research effort to date. HRCS-related research has involved multiple  
25  
26 academic disciplines, employing diverse frameworks, concepts, methods and terminologies, working  
27  
28 in isolation and publishing in different fields (e.g. medical education, communication, operational  
29  
30 research and evaluation). A dedicated, multi-disciplinary, implementation-focused research  
31  
32 approach is undoubtedly required to improve the effectiveness, impact and value for money of  
33  
34 current and future HRCS implementation activities in LMICs. However, there is little evidence of a  
35  
36 unified HRCS implementation science emerging to date.  
37  
38

39  
40  
41 The overall goal of this paper is to advance the development of a unified, implementation-focused  
42  
43 HRCS science. To achieve this goal, a scoping review of HRCS-related publications for the period  
44  
45 2000-2016 was conducted and operational definitions of HRCS within this literature critically  
46  
47 examined. The review findings are not presented as a definitive account of HRCS activity across this  
48  
49 period as relevant material may be unpublished, may be found in the grey literature or may be  
50  
51 published in a lexicon outside of the search terms employed herein. The review is better understood  
52  
53 as an attempt to critically analyse the collective HRCS effort regarding the level, type, cohesion and  
54  
55 conceptual sophistication of the current evidence base. The review may be considered an initial  
56  
57  
58  
59  
60

1  
2  
3 attempt to map the HRCS research effort, providing the impetus and direction for a dedicated HRCS  
4  
5 implementation science to emerge and fostering a common identity for HRCS researchers.  
6  
7  
8

## 9 10 **Methods**

11  
12  
13  
14  
15 This review was conducted according to stages 1-5 of the advanced 'scoping' methodology proposed  
16  
17 by Levac et al <sup>11</sup>, based on the original framework of Arksey and O'Malley <sup>12</sup>. A scoping review was  
18  
19 considered appropriate given the primary focus was on examining the extent, range and nature of  
20  
21 an emerging literature. The critical examination of operational definitions of HRCS falls outside of  
22  
23 the 'scoping review' approach, yet is included as a means of 'revealing' (in part) the conceptual  
24  
25 sophistication and cohesion of the reviewed literature.  
26  
27  
28  
29

## 30 31 **Identification of Data Sources**

32  
33  
34  
35  
36 The first two steps of the scoping review method include identifying a research question and  
37  
38 relevant studies. To explore the breadth, concepts, definitions and methods currently prioritised in  
39  
40 the HRCS literature, we searched for empirical and theoretical literature within the following  
41  
42 databases: PubMed, Global Health, and Scopus. Search terms used were: ("capacity strengthening",  
43  
44 OR "capacity development", OR "capacity building") combined with ("global health" OR,  
45  
46 "international health" OR, "global public health", OR "health research" OR, "health development").  
47  
48 Additional search criteria included: papers published between 01/01/2000 and 31/12/2016 and both  
49  
50 abstract and full paper available in English. Searches began from the year 2000 as a reflection of the  
51  
52 stepwise change in the profile and investment in HRCS. Results were stored within an EndNote  
53  
54 library.  
55  
56  
57  
58  
59  
60



## Selection of Data Sources

Study selection (step 3) included reviewing article title, abstract and key words against the following inclusion criteria: peer reviewed, including primary research, reviews (including but not exclusively systematic reviews), commentaries and opinion pieces; contained the words 'capacity strengthening', 'capacity building' or 'capacity development' or a term with an equivalent meaning; related to global health, international health, health research or health development; and were based in full, or part, on an LMIC context. Articles were kept for full text review if all inclusion criteria were present.

## Data Charting and Analysis

Data charting (step 4) involved JP and SG independently screening publications included for full text review. The independent review process was designed to: 1) eliminate publications that did not meet the selection criteria; 2) assign included publications into one of three pre-determined publication 'typologies' (Box 1); and 3) to identify common groupings of publications within the 'original research' typology based on emergent themes or article focus e.g. HRCS programme evaluation or HRCS methods for implementation. Articles categorised differently between JP and SG, were independently coded by LD and category definitions and assignment finalised by mutual consent. Publication categories were then divided amongst LD, JP and SG for subsequent analysis (step 5). Each member of the research team conducted a detailed review of articles within their category. A-priori information was extracted across all categories as well as inductive category-specific data (listed in Tables 1 and 2 and S2-S8 Tables). Quality of publications was not formally assessed; however, some aspects such as study design, methods and analysis were considered where appropriate.

**Box 1. HRCS Publication Typologies**

**Original Research:** Publications in which a) a hypothesis, research question or study purpose was stated; b) research methods described; c) results reported; and d) the results and their possible implications discussed.

**Perspectives, Opinion or Commentary:** Publications expressing the authors' viewpoint on some aspect of HRCS based on anecdotal evidence, personal experience and/or (in a very few cases) original data that were not presented in an 'original research' format (i.e. did not include a formal description of the research aims, methods, results and discussion).

**Systematic Review:** Publications in which a) research objectives/questions were clearly stated; b) explicit and systematic methods were used; c) methods were limited to the systematic identification and analysis of some form of literature; and d) results were reported and discussed. Non-systematic reviews were included within the original research section.

During in-depth analysis of each publication any operational definition of (health) research capacity strengthening was extracted and analysed for content. To identify commonalities, definition content was independently coded by JP and SG per the a-priori content criteria identified in Table 4. Coding disagreements were resolved by the same process described above. A content score, defined as the number of domains (out of 10) present, was calculated for each definition to identify the most inclusive working definition of HRCS within the current evidence base.

## Results

1195 papers were retrieved via the search methodology of which 172 (see S1 Table) met the final inclusion criteria. The number of HRCS publications identified increased over time, from 0 in the year 2000 to a maximum of 32 in 2016 (Fig 1).

Fig 1. Number of publications per year by publication type.

## HRCS Publication Typologies

Overall, 51% of publications presented a perspective, opinion or commentary, 46% original research and 3% findings from a systematic review (Table 1). The first and/or last author was from an institute located in an LMIC in 58% of publications, 'capacity building' was the favoured term in 59% and 19% presented an operational definition of HRCS.

Table 1. Selected characteristics of reviewed publications

| Publication Type       | No.        | LMIC Authorship <sup>1</sup> |           |            | Capacity Term <sup>2</sup> |           |           |          | Defined HRCS <sup>3</sup> |
|------------------------|------------|------------------------------|-----------|------------|----------------------------|-----------|-----------|----------|---------------------------|
|                        |            | First                        | Last      | Either     | CB                         | CD        | CS        | Oth.     |                           |
| Original Research      | 79         | 31                           | 32        | 41         | 38                         | 18        | 24        | 0        | 17                        |
| Pers. Opin. Commentary | 88         | 36                           | 42        | 56         | 63                         | 6         | 19        | 0        | 16                        |
| Systematic Review      | 5          | 3                            | 1         | 3          | 1                          | 1         | 2         | 0        | 0                         |
| <b>Total</b>           | <b>172</b> | <b>70</b>                    | <b>75</b> | <b>100</b> | <b>102</b>                 | <b>25</b> | <b>45</b> | <b>0</b> | <b>33</b>                 |

1 Based on location of listed organisational affiliation of first and last authors; 'either' = either first or last. 2

capacity term used in title and then keywords given priority. (CB=capacity building, CD=capacity development,

CS=capacity strengthening, Oth.=other). 3 Number of papers that provided an operational definition of HRCS.

1  
2  
3 1  
4  
5 2  
6 **Original Research**  
7  
8 3  
9  
10 4  
11  
12 5  
13  
14 6  
15  
16 7  
17  
18 8  
19  
20  
21 9  
22  
23 10  
24  
25 11  
26  
27 12  
28  
29 13  
30  
31 14  
32  
33 15  
34  
35 16  
36  
37 17  
38  
39 18  
40  
41 19  
42  
43 20  
44  
45 21  
46  
47 22  
48  
49 23  
50  
51 24  
52  
53 25  
54  
55 26  
56  
57  
58  
59  
60

## Original Research

The 79 publications that met 'original research' criteria were sub-categorised into research typologies including: learning and evaluation, assessment, HRCS methods for implementation, evidence synthesis for HRCS implementation and evaluation, and miscellaneous. Table 2 presents selected methodological characteristics of the original research publications both overall and by sub-category. Additional data, not all of which are described below, are included in S2-S8 Tables.

1  
2  
3  
4  
5  
6  
7  
8  
9  
10  
11  
12  
13  
14  
15  
16  
17  
18  
19  
20  
21  
22  
23  
24  
25  
26  
27  
28  
29  
30  
31  
32  
33  
34  
35  
36  
37  
38  
39  
40  
41  
42  
43  
44  
45  
46  
47  
48  
49

27 **Table 2. Selected methodological characteristics of original research publications**

| Sub-Category          | No.       | Setting <sup>1</sup> |          |          |          |          |          |           | Design <sup>2</sup> |           |           |           | Data Collection <sup>3,4</sup> |           |           |           | Data Analysis <sup>4,5</sup> |           |          |
|-----------------------|-----------|----------------------|----------|----------|----------|----------|----------|-----------|---------------------|-----------|-----------|-----------|--------------------------------|-----------|-----------|-----------|------------------------------|-----------|----------|
|                       |           | Af                   | Am       | Se       | Eu       | Em       | Wp       | Gl        | Quan                | Qual      | Mix       | Sur       | IDI                            | FGD       | Rev       | Oth       | The                          | Des       | Inf      |
| Learning & Evaluation | 36        | 14                   | 1        | 4        | 0        | 1        | 4        | 14        | 8                   | 9         | 19        | 20        | 18                             | 5         | 16        | 10        | 28                           | 18        | 1        |
| Assessments           | 27        | 16                   | 0        | 0        | 1        | 2        | 3        | 5         | 6                   | 7         | 14        | 15        | 13                             | 5         | 15        | 7         | 19                           | 22        | 0        |
| HRCS Methods          | 7         | 6                    | 0        | 0        | 0        | 0        | 0        | 1         | 1                   | 5         | 1         | 2         | 1                              | 1         | 4         | 4         | 6                            | 1         | 1        |
| Evidence Synthesis    | 5         | 0                    | 0        | 0        | 0        | 0        | 0        | 5         | 0                   | 4         | 1         | 1         | 0                              | 0         | 5         | 4         | 5                            | 0         | 0        |
| Miscellaneous         | 4         | 2                    | 0        | 0        | 0        | 0        | 0        | 2         | 0                   | 2         | 2         | 2         | 3                              | 0         | 2         | 1         | 4                            | 0         | 0        |
| <b>Total</b>          | <b>79</b> | <b>38</b>            | <b>1</b> | <b>4</b> | <b>1</b> | <b>3</b> | <b>7</b> | <b>27</b> | <b>15</b>           | <b>27</b> | <b>37</b> | <b>40</b> | <b>35</b>                      | <b>11</b> | <b>42</b> | <b>26</b> | <b>62</b>                    | <b>41</b> | <b>2</b> |

28 1. WHO region where the study was located: African (Af), Americas (Am), South-East Asia (Se), European (Eu), Eastern Mediterranean (Em), Western Pacific (Wp) or Global  
29 (Gl)(defined as 3 or more WHO regions). 2. Quantitative (Quan.), qualitative (Qual.) or mixed methods (Mix.). 3. Survey (Sur.), in-depth interview (IDI), focus group  
30 discussion (FGD), literature/document review (Rev.) or other methodology (Other). 4. Categories are not mutually exclusive. 5. Thematic (Them.), descriptive (Desc.) or  
31 inferential (Infer.).

## 36 Learning & evaluation

37 This category included 36 publications that presented findings from a formal evaluation of an HRCS  
38 initiative or described 'learnings' obtained from HRCS implementation (Table 2 and S2 Table). Sixty-  
39 four percent were 'education' based HRCS programmes in which some form of training (inclusive of  
40 postgraduate awards) was provided to strengthen individual capacity and, in some cases, was  
41 inclusive of the development and transfer of a course curriculum at an institutional level e.g. <sup>13</sup>.  
42 Other HRCS programme types included collaborative research (n=12), time-limited work placement  
43 (n=2), strengthening the broader health research system (n=2), infrastructure development (n=1) or  
44 strengthening financial management (n=1). The respective HRCS programmes involved North-South  
45 collaboration in 83% of cases. Seventy-five percent of programmes sought to strengthen research  
46 capacity in a specific subject area, most commonly health systems (n=6).

### 48 Box 2. Learning and Evaluation Typologies

49 **Lessons Learned:** publications focused on broad, programme(s)-level experiences in setting up  
50 and/or participating in an HRCS initiative and/or providing a largely qualitative account of  
51 programme achievements.

52 **Programme Outputs:** publications focused on HRCS programme outputs, where outputs were  
53 defined as a quantification of activities that occurred during the programme and/or related  
54 professional activities that occurred after the programme (e.g. no. of publications).

55 **Programme Outcomes:** publications that focused on improvements in individual-, institutional- or  
56 environmental-level health research capacity following an HRCS initiative and employed quantitative  
57 measures designed to attribute improved performance to the respective HRCS intervention.

58  
59 The objective of each 'learning and/or evaluation' publication was coded per the typologies  
60 presented in Box 2. Overall, 67% of the learning and evaluation publications were given a single code  
61 and 33% were given 2 or more codes. 'Lessons learned' was allocated to 44% of publications,

1  
2  
3 62 'programme outputs' to 33%, 'programme outcomes' to 28% and unique codes were allocated to  
4  
5 63 33%. Quantitative outcome indicators varied among publications that employed them, although  
6  
7 64 were generally: variants of some form of citation analysis to measure influence of research  
8  
9 65 publication (that followed the HRCS intervention) on health policy <sup>14-16</sup>; measures of knowledge  
10  
11 66 change pre- and post-HRCS intervention or knowledge gained from an intervention <sup>17-20</sup>; some form  
12  
13  
14 67 of 'attributional' measure designed to assess the relationship between capacity improvement and  
15  
16 68 the respective HRCS intervention <sup>17 18 21 22</sup>.

17  
18  
19  
20 70 Sixty-four percent of studies were retrospective, 64% were a type of (quasi-) formative evaluation,  
21  
22 71 53% were mixed methods and 17% were authored by individuals independent of the organisation  
23  
24 72 implementing the respective HRCS initiative (study design data not presented in Table 2 are shown  
25  
26 73 in S2 Table). Sampling was primarily purposive (n=20).

## 27 28 29 30 31 75 **Assessments**

32  
33  
34 76 This category included 27 original research publications that presented the outcome of some form of  
35  
36 77 health research capacity assessment (Table 2 and S3 Table). Capacity assessment focus varied; the  
37  
38 78 largest proportion (9/27) focused on assessing capacity to carry out research, often in a specific  
39  
40 79 subject area (18/27), most commonly health policy and systems research (6/27).

41  
42  
43  
44 80 Capacity assessments were conducted within the context of a research institution(s), including  
45  
46 81 universities or research network in 59% of publications. Eleven percent focussed on the capacities of  
47  
48 82 ethics committees and one involved health care providers. The remaining 26% focused on national  
49  
50 83 and/or regional capacity in specific research and/or geographical areas through reviewing literature  
51  
52 84 and publication trends.

53  
54  
55 85 Thirty-seven percent (10/27) of assessments were conducted as part of a consortium based research  
56  
57 86 programme, consisting of European and African partners.

1  
2  
3 87 HRCS methods for implementation  
4  
5 88 This category includes 7 articles that present a methodological approach to HRCS or evaluation of  
6  
7 89 HRCS (S4 Table). Two articles focus on HRCS within the frame of North-South partnerships and 4  
8  
9 90 prioritised general HRCS, often embedded in a specific subject area e.g. policy analysis. The  
10  
11 91 remaining article focused on the development and validation of a questionnaire for evaluation of  
12  
13 92 HRCS training activities.  
14

15  
16 93  
17  
18 94 The numbers of steps in methodological approach varied; however, consistent phasing or process  
19  
20 95 can be identified. In all publications, the purpose of the HRCS activity was initially established  
21  
22 96 although this was only stated as an explicit methodological step in one paper<sup>23</sup>. Three articles then  
23  
24 97 developed bespoke 'optimal health research' criteria or 'ideal partnership capacity' criteria through  
25  
26 98 a combination of literature searches and interactions with key stakeholders. The remaining 4  
27  
28 99 publications adapted an existing tool or framework that could be used as a common ideal for health  
29  
30 100 research or partnership capacity. Once developed, 3 papers described these measures as  
31  
32 101 'standardised'. The remaining 4 papers described these measures as 'semi-standardised' to allow for  
33  
34 102 flexibility in context. Two papers described this flexibility in approach as linked to theory of change  
35  
36 103 or quality assurance (QA) cycle methodology.  
37  
38 104

39  
40 105 Papers then presented the methods used to conduct the assessment. One described a fixed point of  
41  
42 106 quantitative measurement, and six described a phased or developmental approach to identification  
43  
44 107 of both health research capacity strengths and weaknesses, anticipating that as HRCS methods were  
45  
46 108 implemented, weaknesses may be identified and certain areas strengthened. One partnership  
47  
48 109 focused paper described this developmental approach to ensure equity within partnership  
49  
50 110 development. Two papers described assessments that were solely 'self-assessments' (i.e. relied  
51  
52 111 solely on internal institution staff). Four papers described assessments that involved collaborative  
53  
54 112 assessments between partners inside (usually LMIC) and outside (usually high income country (HIC))  
55  
56  
57  
58  
59  
60



1  
2  
3 113 the institution. Four of the papers that took a developmental approach described the end of this  
4  
5 114 process as the collaborative development of continuously evolving capacity strengthening plans  
6  
7 115 which HRCS activities should be implemented against.  
8

9  
10 116

## 11 117 **Evidence synthesis for HRCS implementation and evaluation**

12  
13  
14 118 This category included 5 articles that focused on the synthesis of evidence to enhance learning for  
15  
16 119 the implementation or evaluation of HRCS programmes (S5 Table). Four articles concentrated on  
17  
18 120 understanding multi-programme experience to harmonise learning for HRCS evaluation. All 4 of  
19  
20 121 these articles focus on the experience of funders of HRCS activities, with 3 extending their  
21  
22 122 exploration to the views of HRCS experts, evaluators and/or implementers. The fifth article focused  
23  
24 123 on understanding multi-programme experience to aid in more effective HRCS programme design  
25  
26 124 and implementation for nurses. All articles had a global focus, with four prioritising LMICs.  
27  
28

29  
30 125

31  
32 126 The nuanced nature of each article in this category made identification of core typologies  
33  
34 127 challenging. The 4 articles focused on evidence harmonisation for HRCS<sup>24-27</sup>, argued that evaluations  
35  
36 128 should be underpinned by theory, using logic or theory of change models. However, 3 articles  
37  
38 129 reflected that these models are rarely employed in practice due to time constraints on the  
39  
40 130 evaluation process<sup>24 25 27</sup>. Furthermore, where potential frameworks for evaluation do exist, 2  
41  
42 131 articles described these as being driven by the goal of the funder with limited stakeholder  
43  
44 132 engagement<sup>26 27</sup>. Two articles linked lack of stakeholder engagement in evaluation design to issues  
45  
46 133 of equity<sup>24 26</sup>, arguing that for HRCS activities to be equitable, members of the most marginalised  
47  
48 134 populations should be involved in evaluation design and indicators should reflect equity issues.  
49

50  
51 135

## 52 53 54 136 **Miscellaneous**

1  
2  
3 137 Four original research articles could not be assigned to any sub-category (Table 2 and S6 Table). The  
4  
5 138 first publication was a qualitative cross sectional study that investigated the challenges and benefits  
6  
7 139 of research capacity strengthening through North-South research partnerships from a Ugandan  
8  
9 140 perspective. The second publication was a qualitative case study of health research commissioning  
10  
11 141 among different organisations in East Africa. The third, investigated researchers' (involved in  
12  
13 142 collaborative networks across LMICs) experiences regarding science and ethics in global health  
14  
15 143 research collaborations. The fourth publication discussed different experiences of mentoring health  
16  
17 144 researchers across HICs and LMICs, as effective mentorship of researchers is crucial for research  
18  
19 145 capacity strengthening.  
20  
21  
22  
23  
24

## 147 **Perspectives, Opinion or Commentary**

25  
26  
27  
28 148  
29  
30 149 The 88 'perspective' publications were coded based on the primary subject matter. Codes included  
31  
32 150 the three previously described in Box 2 and the additional codes 'programme description' and  
33  
34 151 'recommendations'. Publications were coded 'programme description' if they presented a  
35  
36 152 description of a specific HRCS programme or activity. Publications were coded 'recommendations' if  
37  
38 153 a primary purpose of the publication was to describe steps, processes, approaches and/or activities  
39  
40 154 that, per the authors' views and experiences, would enhance capacity strengthening initiatives.  
41  
42 155 There is significant overlap between the categories 'lessons learned' and 'recommendations'. The  
43  
44 156 key point of difference is that the lessons or recommendations presented in publications coded  
45  
46 157 'recommendations' are largely based on broad experience or reading of the literature rather than  
47  
48 158 reference to a specific HRCS programme or programme type (in which case they would be coded  
49  
50 159 'lessons learned').  
51  
52  
53  
54

55  
56 161 Overall, 73% of the perspective, opinion or commentary publications were given a single 'focus' code  
57  
58 162 and 27% were given 2 or more codes. 'Lessons learned' was allocated to 49% of publications,  
59  
60

1  
2  
3 163 'programme description' to 26%, 'recommendations' to 25%, 'programme outputs' to 19%,  
4  
5 164 'programme outcomes' to 2% and unique codes were allocated to 8%. The quantitative outcome  
6  
7 165 indicators included a measure of knowledge change pre- and post-HRCS intervention <sup>28</sup> and an  
8  
9 166 'attributional' measure designed to assess the relationship between capacity improvement and the  
10  
11 167 respective HRCS intervention <sup>29</sup>.

12  
13 168  
14  
15 169 The content of the various perspective, opinion or commentary publications was derived from HRCS  
16  
17 170 experience in 76% of publications, although in the majority commentary pertained to experience  
18  
19 171 from a single HRCS programme (59/67). Content was also drawn from reviews of HRCS-related  
20  
21 172 literature or documentation (12/88), HRCS-related workshops (5/88) and in 8 cases the basis of the  
22  
23 173 commentary was not stated. The HRCS programme or activity types varied widely, ranging from a  
24  
25 174 broad emphasis on HRCS in LMICs to specific aspects of HRCS in specified countries.

26  
27  
28  
29 175

## 30 31 176 **Systematic Review**

32  
33  
34  
35 177 Five publications fitted this category (S8 Table). Two publications reviewed tools and approaches to  
36  
37 178 assess capacity needs and monitor and evaluate capacity strengthening activities <sup>30 31</sup>. Three  
38  
39 179 publications did not focus on specific HRCS activities, but used bibliometric and scientometric  
40  
41 180 techniques to investigate health research capacity in specific subject areas focussing on publication  
42  
43 181 trends, author affiliations, geographical areas of the study, study design and thematic focus <sup>32-34</sup>.

44  
45  
46  
47 182 Two publications searched a single database, 2 searched 2 and 1 searched 3. Four publications  
48  
49 183 searched PubMed as the main database. Four publications followed a single systematic search  
50  
51 184 strategy, whereas 1 employed a systematic search and snowball-sampling to identify publications  
52  
53 185 after considering inclusion and exclusion criteria. The number of papers included in each review  
54  
55 186 varied from 14–690.

1  
2  
3 1874  
5 1886  
7  
8 189 **HRCS Definitions**

9  
10 190 Nineteen percent (33/172) of publications presented an operational definition of 'capacity' (S9  
11  
12 191 Table). The definition specifically pertained to 'health research capacity' in 7 publications; in the  
13  
14 192 remaining publications' broader definitions of 'research capacity' (n=10), 'capacity' (n=6) or  
15  
16 193 'organisational capacity' (n=1) were presented and in 2 publications capacity was operationally  
17  
18 194 defined as 'progress'. Twenty-five separate definitions were presented of which 9 were original  
19  
20 195 (Table 3). Seven of the 25 definitions were cited by 2 (n=4), 3 (n=2) or 4 (n=1) publications. In all  
21  
22 196 other cases the definition was presented in a single publication. Three publications presented 2  
23  
24 197 definitions.

25  
26  
27 198

28  
29 199 Thirty-six percent of the definitions included explicit reference to all 3 levels of capacity  
30  
31 200 strengthening, 12% included explicit reference to all 3 aspects of the research process (defining  
32  
33 201 research questions, conducting research and communicating/applying research outcomes) and 28%  
34  
35 202 included explicit reference to at least 2 of the 4 'other' content domains assessed, the most common  
36  
37 203 of which included reference to HRCS as improving research quality or ability (n=11) or HRCS as a  
38  
39 204 process (n=9) (Table 3). Out of the 10 content domains assessed, the median number present across  
40  
41 205 all definitions was 4 (range 2-9). Variation in median 'content' score was evident across the  
42  
43 206 definition types: the median score for 'health research capacity' definitions was 3 (range 2-6), 5  
44  
45 207 (range 2-9) for 'research capacity' definitions, 4 (range 3-5) for 'capacity' definitions and 2 (range 2)  
46  
47 208 for the 'organisational capacity' and 'progress' definitions.

48  
49  
50 20951  
52 21053  
54 21155  
56 21257  
58  
59  
60 18

213 Table 3. Content analysis of 'capacity' definitions<sup>1</sup>

| Subject Defined          | Capacity Term                                | Content Domains <sup>2</sup> |      |      |      |      |      |     |      |      |     |
|--------------------------|----------------------------------------------|------------------------------|------|------|------|------|------|-----|------|------|-----|
|                          |                                              | Ind.                         | Ins. | Env. | Def. | Car. | App. | Qua | Sus. | Pro. | Con |
| Health Research Capacity | Building [30], Strengthening [70]            | x                            | x    | x    |      | x    | x    |     | x    |      |     |
|                          | Building [166], Strengthening [74, 126]      |                              | x    |      | x    | x    |      |     | x    |      |     |
|                          | Strengthening [123]                          |                              |      | x    |      |      |      | x   |      |      |     |
|                          | Development [45]                             |                              | x    |      |      |      |      | x   |      | x    |     |
|                          | Strengthening [48]                           |                              |      |      |      | x    | x    |     |      |      |     |
|                          | Building [139]                               | x                            | x    |      |      |      | x    |     | x    |      |     |
|                          | Building [97]                                | x                            | x    |      |      |      |      | x   |      |      |     |
| Research Capacity        | Building [164], Strengthening [29, 123, 159] | x                            | x    | x    | x    | x    | x    |     |      | x    | x   |
|                          | Strengthening [16, 72]                       | x                            | x    |      |      | x    |      | x   |      | x    |     |
|                          | Development [4], Strengthening [31, 74]      | x                            | x    | x    | x    | x    | x    | x   | x    | x    |     |
|                          | Building [132]                               |                              |      |      |      | x    | x    |     |      |      |     |
|                          | Building [91, 96]                            | x                            | x    |      |      | x    | x    | x   |      |      |     |
|                          | Building [130]                               | x                            | x    | x    |      |      |      |     |      | x    | x   |
|                          | Strengthening [165]                          | x                            | x    |      |      | x    |      | x   |      |      |     |

|                         |                                  |   |   |   |   |   |   |   |
|-------------------------|----------------------------------|---|---|---|---|---|---|---|
|                         | Building [46]                    | x | x | x | x | x | x | x |
|                         | Strengthening [79]               | x | x | x |   |   |   |   |
|                         | Building [166]                   | x |   |   |   | x |   | x |
| Capacity                | Building [25]                    | x | x | x |   |   |   | x |
|                         | Building [133]                   |   | x | x |   |   | x | x |
|                         | Strengthening [66]               | x | x | x |   |   |   | x |
|                         | Strengthening [65]               | x | x | x |   |   | x | x |
|                         | Building [150]                   |   | x | x |   |   |   | x |
|                         | Strengthening [47]               | x |   |   |   | x |   | x |
| Organisational Capacity | Development [27]                 |   | x |   |   |   |   | x |
| Progress                | Building [142], Development[143] |   |   |   |   | x | x |   |

1. Numbered citations pertain to the reference list in S1 Table. 2. The content of each definition was independently coded according to the following criteria: explicit reference to individual (ind.), institutional (Ins.) or environmental (Env.) level capacity strengthening; explicit reference to strengthening capacity in terms of defining research questions or identifying research priorities (Def.), conducting research or applying research methods (Car.) or communicating and applying research outcomes (App.); explicit reference to facilitating an improvement in research abilities/quality (Qua.) sustainability (Sus.), reference to HRCS as a process (Pro.) and/or HRCS as a continuous activity (Con.).

1  
2  
3 221 Variation between a capacity definition and favoured capacity 'term' (i.e. building, strengthening or  
4  
5 222 development) was evident where a definition had been cited by more than 1 paper. For example,  
6  
7 223 "an ability of individuals, organisations or systems to perform and utilise health research effectively,  
8  
9 224 efficiently and sustainably"<sup>35</sup> was variously presented as a definition of health research capacity  
10  
11 225 'strengthening'<sup>35</sup> and health research capacity 'building'<sup>16</sup>.

12  
13  
14 226

15  
16 227 An additional content analysis was conducted to examine the possible relationship between  
17  
18 228 favoured capacity term and choice of capacity definition (S10 Table). Of the definitions used in the  
19  
20 229 14 publications that favoured the term 'capacity building', the median content score was 4 (range 2-  
21  
22 230 8), 36% (5/14) included a specific reference to all 3 levels of capacity strengthening, 14% (2/14)  
23  
24 231 included explicit reference to all 3 aspects of the research process and 21% (3/14) included explicit  
25  
26 232 reference to at least 2 of the 4 'other' content domains assessed. Comparative results for the 12  
27  
28 233 publications that favoured the term 'capacity strengthening' were: 4 (2-9), 50% (6/12), 17% (2/12)  
29  
30 234 and 33% (4/12) and 2.5 (range 2-9), 25% (1/4), 25% (1/4), 25% (1/4) for the 4 publications that  
31  
32 235 favoured the term 'capacity development'.

33  
34  
35 236

## 37 237 **Discussion**

38  
39  
40  
41  
42 238

43  
44 239 The purpose of this scoping review was to map the current HRCS research effort since the year 2000  
45  
46 240 and to critically examine how HRCS has been defined within the literature. With regards to the level  
47  
48 241 and type of HRCS-related publication, the study revealed that the number of HRCS publications has  
49  
50 242 increased exponentially between 2000 and 2016. Most publications during this period have been  
51  
52 243 perspective, opinion or commentary pieces. Publications presenting original research findings also  
53  
54 244 increased over this period and have been the primary publication type since 2013, indicating an  
55  
56 245 emerging field of predominantly implementation-focused HRCS science. Almost half of the original  
57  
58  
59  
60

1  
2  
3 246 research papers pertained to the African region as did a large proportion of commentary papers (S7  
4  
5 247 Table). An Afrocentric evidence base may reflect current HRCS funding priorities <sup>36</sup> and need;  
6  
7 248 however, such Afrocentrism renders it difficult to generalise the collective findings to LMIC settings  
8  
9 249 in other geographical regions.  
10

11 250

12  
13 251 The findings and recommendations presented in this paper should be considered alongside  
14  
15 252 limitations in the review methodology. HRCS research, reviews and commentaries published in non-  
16  
17 253 Anglophone journals, in non-health related journals or in a lexicon outside of the key word terms  
18  
19 254 employed herein would not have been retrieved by the search methodology. Relevant work that  
20  
21 255 remains unpublished, published outside of academic peer-reviewed journals or published prior to  
22  
23 256 2000 would also have been omitted. Thus, the reported findings should not be considered a  
24  
25 257 comprehensive representation of the existing literature pertaining to HRCS in LMICs. The analysis of  
26  
27 258 retrieved publications was limited to identifying the typologies within, and key characteristics of, the  
28  
29 259 collective literature as well as the frequency and type of operational HRCS definitions. The review  
30  
31 260 did not critically examine the quality of the research effort (in original research publications) or  
32  
33 261 analyse the output (findings) of the collective research effort. These tasks were outside the scope of  
34  
35 262 this review, but warrant future attention to inform a fuller assessment of the 'value' of published  
36  
37 263 HRCS research. All authors on this publication have considerable experience working in and/or with  
38  
39 264 health research institutions in LMICs. However, all authors originate from, were educated in and are  
40  
41 265 currently based in a high-income country context. Interpretation of the reported findings may  
42  
43 266 reflect this reality.  
44  
45  
46  
47

48 267

49  
50 268 Our findings suggest conceptual representations of HRCS within the published literature are  
51  
52 269 inconsistent and infrequently applied. Capacity was rarely defined across the publications and the  
53  
54 270 definitions that were presented varied widely in content and scope. Broader definitions of 'research  
55  
56 271 capacity' or 'capacity', rather than specific 'health research capacity' definitions, were most  
57  
58  
59

60 22



1  
2  
3 272 commonly employed and no 'one' specific definition of health research capacity was consistently  
4  
5 273 applied. There appeared to be no relationship between a favoured capacity term, such as 'building'  
6  
7 274 or 'strengthening', and the type of capacity definition used or the content of that definition. There  
8  
9 275 was no apparent difference between operational definitions of (health) research capacity building,  
10  
11 276 strengthening or development even though distinctions between these terms and the concepts they  
12  
13 277 represent have previously been drawn <sup>8 10 37</sup>. The content analysis identified a divide between many  
14  
15 278 of the capacity definitions presented and current conceptualisations of a multi-level 'systems'  
16  
17 279 approach to HRCS <sup>5 6</sup>. For example, only 36% of the proffered definitions made explicit reference to  
18  
19 280 individual, institutional and environmental level capacity strengthening and only 12% explicitly  
20  
21 281 applied the definition to all stages of the research process from conception to subsequent uptake.  
22  
23  
24 282  
25  
26 283 There was little sign of cohesion or 'connectedness' across the HRCS-related literature. Greater use  
27  
28 284 of theory of change or logic models in HRCS programme and evaluation design was advocated <sup>31-34</sup>  
29  
30 285 and evident among the sub-set of articles focusing on HRCS methods for implementation <sup>27 28 30 32</sup>.  
31  
32 286 However, systematic reviews or syntheses of available evidence were uncommon, despite the  
33  
34 287 relatively narrow focus of the collective literature, and the available conceptual models and  
35  
36 288 methodologies were rarely applied in practice. For example, learning and evaluation studies were  
37  
38 289 typically retrospective and capacity assessments limited to a single 'fixed' time point, in contrast to  
39  
40 290 the prospective, phased approaches deemed necessary to advance our understanding of what works  
41  
42 291 well in HRCS implementation <sup>28 32</sup>. Furthermore, while multi-level, systems wide HRCS interventions  
43  
44 292 are increasingly advocated <sup>5-7</sup>, learning and evaluation studies commonly centred on individual-level  
45  
46 293 education-based activities. This may reflect intervention or evaluation design, but either way  
47  
48 294 highlights the absence of a widely accepted overarching (H)RCS framework to promote prevailing  
49  
50 295 theories and concepts or to link the increasingly active HRCS research community.  
51  
52  
53  
54  
55 296  
56  
57  
58  
59  
60

1  
2  
3 297 Collectively, findings suggest the existing (published) evidence-base is not yet sufficiently developed  
4  
5 298 to reliably inform HRCS interventions in LMICs. The disjointed research effort is exacerbated by the  
6  
7 299 absence of a recognisable HRCS research 'field' and the lack of a defined, needs-based HRCS-specific  
8  
9 300 research agenda. Published research primarily consists of anecdotal, qualitative or descriptive  
10  
11 301 accounts of single interventions not readily generalizable across different types of HRCS or to regions  
12  
13 302 outside of Africa. While research quality was not formally assessed in the context of this review, the  
14  
15 303 body of evidence needs further development when considered against relevant standards such as  
16  
17 304 the Medical Research Council's guidance for developing and evaluating complex interventions<sup>38</sup> or  
18  
19 305 against common hierarchies of evidence<sup>39</sup>, inclusive of hierarchies specifically for assessing  
20  
21 306 qualitative health research<sup>40</sup>. Good research practice would further suggest that no new 'learning'  
22  
23 307 studies should be completed without first reviewing the existing evidence of 'what works' or 'lessons  
24  
25 308 learned' from previous investments or interventions<sup>41</sup>.

26  
27  
28  
29 309  
30  
31 310 Three comprehensive definitions that explicitly align with current HRCS guidelines were evident  
32  
33 311 across the reviewed publications, although all three pertain to the broader notion of 'research  
34  
35 312 capacity' strengthening. These included: "the ongoing process of empowering individuals,  
36  
37 313 institutions, organisations, and nations to: define and prioritise problems systematically; develop  
38  
39 314 and scientifically evaluate appropriate solutions; and share and apply the knowledge generated"<sup>42</sup>;  
40  
41 315 "the process by which individuals, organisations, and societies develop abilities (individually and  
42  
43 316 collectively) to perform functions effectively, efficiently and in a sustainable manner to define  
44  
45 317 problems, set objectives and priorities, build sustainable institutions and bring solutions to key  
46  
47 318 national problems"<sup>43</sup>; and "strengthening the abilities of individuals, institutions, and countries to  
48  
49 319 perform research functions, defining national problems and priorities, solving national problems,  
50  
51 320 utilizing the results of research in policy making and programme delivery"<sup>44</sup>.

52  
53  
54  
55 321

1  
2  
3 322 In our opinion, the RCS definition presented by Lansang and Dennis <sup>42</sup> is the best among those  
4  
5 323 presented in this review. This definition not only reflects current HRCS 'best practice' (i.e.  
6  
7 324 encompasses all three levels of research capacity and spans the research process from conception to  
8  
9 325 uptake) but also positions RCS as an 'ongoing process' and places few parameters on the focus of the  
10  
11 326 research to be supported (beyond defining and prioritising 'problems' systematically). Alternative  
12  
13 327 definitions, such as those provided by the Global Forum for Health Research <sup>43</sup> or the United Nations  
14  
15 328 Development Program <sup>44</sup>, limit the HRCS focus to '(key) national problems'. Whilst a focus on  
16  
17 329 national problems is undoubtedly important, these definitions suggest restrictions on what types of  
18  
19 330 research capacity should be strengthened. The more comprehensive, and more frequently used,  
20  
21 331 'research capacity' definitions further raise the possibility that a health-specific RCS definition may  
22  
23 332 not be needed. Arguably, a comprehensive, rather than sector-specific, RCS definition would  
24  
25 333 suitably reflect contemporary HRCS approaches and illuminate the potential for health-specific RCS  
26  
27 334 interventions to enhance capacity for all/additional (i.e. non-health) research areas within a target  
28  
29 335 institution or environment (where applicable). Whilst discipline specific nuance may sometimes be  
30  
31 336 required, promoting this kind of inter-sectoral, systems level thinking and discouraging vertical,  
32  
33 337 parallel processes that can arise from topic-specific interventions, is increasingly advocated in the  
34  
35 338 health sector <sup>45 46</sup> and is equally applicable in the context of a national research system.  
36  
37  
38  
39  
40  
41  
42  
43  
44  
45  
46  
47  
48  
49  
50  
51  
52  
53  
54  
55  
56  
57  
58  
59  
60

1  
2  
3 348 Without an agreed definition and understanding of HRCS, it is difficult to calculate annual  
4  
5 349 investment in HRCS in LMICs, but the sum is likely to be substantial. For example, the United  
6  
7 350 Kingdom's 'Global Challenges Research Fund' totals 1.5 billion pounds over a five-year period to  
8  
9 351 support cutting edge research addressing challenges faced by developing countries, a significant  
10  
11 352 proportion of which is allocated for strengthening capacity for research and innovation within LMICs  
12  
13 353 (<http://www.rcuk.ac.uk/funding/gcrf/>). Thus, a 5% investment in (H)RCS implementation science  
14  
15 354 could support a substantial research effort and rapidly accelerate learning about how to do HRCS  
16  
17 355 more effectively.  
18  
19  
20  
21

22 356  
23 357 Crucially, given the aim of the HRCS research endeavour, ensuring equitable participation by LMIC  
24  
25 358 partners in the development of an HRCS implementation science is essential. Metrics that better  
26  
27 359 account for LMIC contribution may assist this. Despite promising findings, such as relatively high  
28  
29 360 levels of LMIC authorship, questions can be raised as to what extent such indicators reliably reflect  
30  
31 361 equitable contribution in HRCS implementation and research<sup>48</sup>. Relatively few studies examined  
32  
33 362 North-South HRCS partnerships (a dominant form of HRCS implementation) from an exclusively  
34  
35 363 southern perspective, or contrasted North-South models with South-South variants, suggesting an  
36  
37 364 absence of critical reflection on the experiences and realities of those for whom HRCS interventions  
38  
39 365 are intended. Such 'silencing' in intervention design and development should be rectified if  
40  
41 366 ownership (an essential element of sustainability for HRCS interventions)<sup>49-51</sup> is to be promoted.  
42  
43 367 Conversely, it is widely acknowledged that equitable and effective partnerships should be of mutual  
44  
45 368 benefit to all parties<sup>52</sup>, yet benefits to the more strongly capacitated partners in HRCS  
46  
47 369 implementation (e.g. those in HIC) were rarely discussed. Consideration of such issues will likely  
48  
49 370 afford deeper insights into how power and politics influence equity in the design and development  
50  
51 371 of HRCS theory and implementation, as well as allowing more rigorous examination as to which  
52  
53 372 models of implementation provide the most equitable, efficient and sustainable gains for HRCS.  
54  
55  
56  
57  
58  
59  
60

374

## 375 Conclusions & Recommendations

376

377 The review findings indicate a HRCS research field with a focus on implementation science is  
378 emerging, although the conceptual and empirical bases are not yet sufficiently advanced to  
379 effectively inform HRCS programme planning. The constituent parts for a coherent and conceptually  
380 driven research effort are present (if somewhat embryonic), but are not yet aligned under a  
381 recognisable 'HRCS implementation science' framework. Consolidating a HRCS implementation  
382 science therefore presents as a viable option that may accelerate the development of a useful  
383 evidence-base to inform HRCS programme planning. Identifying an agreed operational definition of  
384 HRCS, standardising HRCS-related terminology, developing a needs-based HRCS-specific research  
385 agenda and synthesising currently available evidence may be useful first steps. Crucially, given the  
386 aim of the HRCS research endeavour, ensuring equitable participation by LMIC partners in the  
387 development of an HRCS implementation science is essential. Advancing a dedicated HRCS  
388 implementation science will require specialist meetings (e.g. technical working groups, research  
389 priority setting forums) with representation from influential HRCS researchers, key LMIC partners,  
390 funders and implementers as well as the creation and maintenance of networking and resource  
391 sharing fora. The continued, substantial investment in HRCS in LMICs suggests apportioning a  
392 fraction of the various research and development budgets to support HRCS implementation science  
393 would represent a good 'buy'.

394

395

396

397

398

399

400 **References**

- 401 1. McKee M, Stuckler D, Basu S. Where there is no health research: What can be done to fill the  
402 global gaps in health research? *PLoS medicine* 2012;9(4) doi: 10.1371/journal.pmed.1001209
- 403 2. Kebede D, Zielinski C, Mbondji PE, et al. Human resources in health research institutions in sub-  
404 Saharan African countries: results of a questionnaire-based survey. *Journal of the Royal*  
405 *Society of Medicine* 2014;107(Suppl. 1):85-95.
- 406 3. Kebede D, Zielinski C, Mbondji PE, et al. Institutional facilities in national health research systems  
407 in sub-Saharan African countries: results of a questionnaire-based survey. *Journal of the*  
408 *Royal Society of Medicine* 2014;107(1 suppl):96-104. doi: 10.1177/0141076813517680
- 409 4. Ijsselmuiden C, Marais DL, Becerra-Posada F, et al. Africa's neglected area of human resources for  
410 health research - the way forward. *South African Medical Journal* 2012;102(4):228-33.
- 411 5. Ghaffar A, Ijsselmuiden C, Zucker F. Changing mindsets: Research capacity strengthening in low-  
412 and middle-income countries. Geneva: COHRED, Global Forum for Health Research and  
413 UNICEF/UNDP/World Bank/WHO Special Programme for Research and Training in Tropical  
414 Diseases (TDR), 2008.
- 415 6. ESSENCE. Planning, monitoring and evaluation framework for research capacity strengthening.  
416 Geneva: TDR-ESSENCE on Health Research, 2016.
- 417 7. DFID. Capacity building in research: A DFID practice paper. In: Department for International  
418 Development, ed. London, 2010.
- 419 8. Franzen SR, Chandler C, Lang T. Health research capacity development in low and middle income  
420 countries: reality or rhetoric? A systematic meta-narrative review of the qualitative  
421 literature. *BMJ open* 2017;7(1):e012332. doi: 10.1136/bmjopen-2016-012332
- 422 9. Commission on Health Research for Development. Health Research: Essential Link to Equity in  
423 Development. Cambridge, USA: Commission on Health Research for Development, 1990.
- 424 10. Redman-Maclaren M, MacLaren DJ, Harrington H, et al. Mutual research capacity strengthening:  
425 a qualitative study of two-way partnerships in public health research. *International journal*  
426 *for equity in health* 2012;11(79):
- 427 11. Levac D, Colquhoun H, O'Brien KK. Scoping studies: advancing the methodology. *Implementation*  
428 *science : IS* 2010;5:69. doi: 10.1186/1748-5908-5-69
- 429 12. Arksey H, O'Malley L. Scoping studies: towards a methodological framework. *International*  
430 *Journal of Social Research Methodology* 2005;8(1):19-32.
- 431 13. Byrne E, Donaldson L, Manda-Taylor L, et al. The use of technology enhanced learning in health  
432 research capacity development: lessons from a cross country research partnership.  
433 *Globalization and health* 2016;12(19):
- 434 14. Bennett S, Paina L, Ssengooba F, et al. The impact of Fogarty International Center research  
435 training programs on public health policy and program development in Kenya and Uganda.  
436 *BMC public health* 2013;13(770):
- 437 15. Zachariah R, Guillermin N, Berger S, et al. Research to policy and practice change: is capacity  
438 building in operational research delivering the goods? *Tropical Medicine and International*  
439 *Health* 2014;19(9):1068-75.
- 440 16. Mahmood S, Hort K, Ahmed S, et al. Strategies for capacity building for health research in  
441 Bangladesh: Role of core funding and a common monitoring and evaluation framework.  
442 *Health research policy and systems* 2011;9 doi: 10.1186/1478-4505-9-31

28

- 1  
2  
3 443 17. Wilson LL, Rice M, Jones CT, et al. Enhancing research capacity for global health: Evaluation of a  
4 444 distance-based program for international study coordinators. *Journal of Continuing*  
5 445 *Education in the Health Professions* 2013;33(1):67-75. doi: 10.1002/chp.21167
- 6 446 18. Goto A, Nguyen Quang V, Nguyen Thi Tu V, et al. Epidemiology research training in Vietnam:  
7 447 evaluation at the five year mark. *Fukushima journal of medical science* 2010;56(1):63-70.
- 8 448 19. Thomson DR, Semakula M, Hirschhorn LR, et al. Applied statistical training to strengthen analysis  
9 449 and health research capacity in Rwanda. *Health research policy and systems* 2016;14(1) doi:  
10 450 10.1186/s12961-016-0144-x
- 11 451 20. Mahendradhata Y, Nabieva J, Ahmad RA, et al. Promoting good health research practice in low-  
12 452 and middle-income countries. *Global health action* 2016;9:32474. doi:  
13 453 10.3402/gha.v9.32474
- 14 454 21. Minja H, Nsanzabana C, Maure C, et al. Impact of health research capacity strengthening in low-  
15 455 and middle-income countries: the case of WHO/TDR programmes. *PLoS neglected tropical*  
16 456 *diseases* 2011;5(10):e1351-e51.
- 17 457 22. Kaser M, Maure C, Halpaap BM, et al. Research Capacity Strengthening in Low and Middle  
18 458 Income Countries - An Evaluation of the WHO/TDR Career Development Fellowship  
19 459 Programme. *PLoS neglected tropical diseases* 2016;10(5):e0004631. doi:  
20 460 10.1371/journal.pntd.0004631
- 21 461 23. Bates I, Boyd A, Smith H, et al. A practical and systematic approach to organisational capacity  
22 462 strengthening for research in the health sector in Africa. *Health research policy and systems*  
23 463 2014;12(11):
- 24 464 24. Cole DC, Boyd A, Aslanyan G, et al. Indicators for tracking programmes to strengthen health  
25 465 research capacity in lower- and middle-income countries: a qualitative synthesis. *Health*  
26 466 *research policy and systems* 2014;12(17):
- 27 467 25. Gadsby EW. Research capacity strengthening: donor approaches to improving and assessing its  
28 468 impact in low- and middle-income countries. *International Journal of Health Planning and*  
29 469 *Management* 2011;26(1):89-106.
- 30 470 26. Boyd A, Cole DC, Cho DB, et al. Frameworks for evaluating health research capacity  
31 471 strengthening: a qualitative study. *Health research policy and systems* 2013;11(46):
- 32 472 27. Bates I, Boyd A, Aslanyan G, et al. Tackling the tensions in evaluating capacity strengthening for  
33 473 health research in low- and middle-income countries. *Health policy and planning*  
34 474 2015;30(3):334-44.
- 35 475 28. Kutcher S, Horner B, Cash C, et al. Building psychiatric clinical research capacity in low and middle  
36 476 income countries: The Cuban-Canadian partnership project. *Innovation Journal* 2010;15(1):1-  
37 477 10.
- 38 478 29. Goto A, Thi Ngoc Phuong N, Thi Mai Huong N, et al. Building postgraduate capacity in medical  
39 479 and public health research in Vietnam: An in-service training model. *Public health*  
40 480 2005;119(3):174-83. doi: 10.1016/j.puhe.2004.05.005
- 41 481 30. Mugabo L, Rouleau D, Odhiambo J, et al. Approaches and impact of non-academic research  
42 482 capacity strengthening training models in sub-Saharan Africa: a systematic review. *Health*  
43 483 *research policy and systems* 2015;13(30):
- 44 484 31. Huber J, Nepal S, Bauer D, et al. Tools and instruments for needs assessment, monitoring and  
45 485 evaluation of health research capacity development activities at the individual and  
46 486 organizational level: A systematic review. *Health research policy and systems* 2015;13(1) doi:  
47 487 10.1186/s12961-015-0070-3
- 48 488 32. Adedokun BO, Olopade CO, Olopade OI. Building local capacity for genomics research in Africa:  
49 489 Recommendations from analysis of publications in Sub-Saharan Africa from 2004 to 2013.  
50 490 *Global health action* 2016;9(1) doi: 10.3402/gha.v9.31026
- 51 491 33. González-Block MA, Vargas-Riaño EM, Sonela N, et al. Research capacity for institutional  
52 492 collaboration in implementation research on diseases of poverty. *Tropical Medicine and*  
53 493 *International Health* 2011;16(10):1285-90.

- 1  
2  
3 494 34. San Sebastian M, Hurtig AK. Review of health research on indigenous populations in Latin  
4 495 America, 1995-2004. *Salud publica de Mexico* 2007;49(4):316-20. [published Online First:  
5 496 2007/08/22]
- 6 497 35. Bates I, Akoto AY, Ansong D, et al. Evaluating health research capacity building: an evidence-  
7 498 based tool. *PLoS medicine* 2006;3(8):e299. doi: 10.1371/journal.pmed.0030299
- 8 499 36. UKCDS. Health Research Capacity Strengthening: A A UKCDS Mapping. London: United Kingdom  
9 500 Collaborative on Development Sciences (UKCDS), 2015.
- 10 501 37. Vasquez EE, Hirsch JS, Giang le M, et al. Rethinking health research capacity strengthening.  
11 502 *Global public health* 2013;8 Suppl 1:S104-24. doi: 10.1080/17441692.2013.786117
- 12 503 38. Craig P, Dieppe P, Macintyre S, et al. Developing and evaluating complex interventions: the new  
13 504 Medical Research Council guidance. *BMJ* 2008;337:a1655. doi: 10.1136/bmj.a1655
- 14 505 39. Petticrew M, Roberts H. Evidence, hierarchies, and typologies: horses for courses. *Journal of*  
15 506 *epidemiology and community health* 2003;57(7):527-9.
- 16 507 40. Daly J, Willis K, Small R, et al. A hierarchy of evidence for assessing qualitative health research. *J*  
17 508 *Clin Epidemiol* 2007;60(1):43-9. doi: 10.1016/j.jclinepi.2006.03.014
- 18 509 41. Lund H, Brunnhuber K, Juhl C, et al. Towards evidence based research. *BMJ* 2016;355:i5440. doi:  
19 510 10.1136/bmj.i5440
- 20 511 42. Lansang MA, Dennis R. Building capacity in health research in the developing world. *Bulletin of*  
21 512 *the World Health Organization* 2004;82(10):764-70.
- 22 513 43. Global Forum for Health Research. The 10/90 Report on Health Research 2003-2004. Geneva:  
23 514 Global Forum for Health Research, 2004.
- 24 515 44. UNDP. Technical advisory paper, No:2. New York: UNDP, 1999.
- 25 516 45. Ooms G, Van Damme W, Baker BK, et al. The 'diagonal' approach to Global Fund financing: a cure  
26 517 for the broader malaise of health systems? *Globalization and health* 2008;4:6. doi:  
27 518 10.1186/1744-8603-4-6
- 28 519 46. Hafner T, Shiffman J. The emergence of global attention to health systems strengthening. *Health*  
29 520 *policy and planning* 2013;28(1):41-50. doi: 10.1093/heapol/czs023
- 30 521 47. Chan M, Kazatchkine M, Lob-Levyt J, et al. Meeting the demand for results and accountability: a  
31 522 call for action on health data from eight global health agencies. *PLoS medicine*  
32 523 2010;7(1):e1000223. doi: 10.1371/journal.pmed.1000223
- 33 524 48. Bradley M. North-south research partnerships: literature review and annotated bibliography.  
34 525 Ottawa, Canada: International Development Research Centre, 2006.
- 35 526 49. KFPE. A Guide for Transboundary Research Partnerships: 11 Principles and 7 Questions. Bern,  
36 527 Switzerland: Swiss Commission for Research Partnerships with Developing Countries (KFPE),  
37 528 2012.
- 38 529 50. Pryor J, Kuupole A, Kutor N, et al. Exploring the fault lines of cross-cultural collaborative  
39 530 research. *Compare* 2009;39:769-82.
- 40 531 51. Dean L, Njelesani J, Smith H, et al. Promoting sustainable research partnerships: a mixed-method  
41 532 evaluation of a United Kingdom-Africa capacity strengthening award scheme. *Health*  
42 533 *research policy and systems* 2015;13(81):
- 43 534 52. Musolino N, Lazdins J, Toohey J, et al. COHRED Fairness Index for international collaborative  
44 535 partnerships. *Lancet (London, England)* 2015;385(9975):1293-4. doi: 10.1016/S0140-  
45 536 6736(15)60680-8

537

## 538 Acknowledgements

539



1  
2  
3 539 The authors would like to thank Helen Smith and Janet Njelesani who contributed to an earlier  
4  
5 540 version of this manuscript. Rachel Tolhurst is also acknowledged for providing a critical review of the  
6  
7 541 final draft.  
8  
9

## 10 542 **Funding Statement**

11  
12  
13 543 This research received no specific grant from any funding agency in the public, commercial or not-  
14  
15 544 for-profit sectors.  
16

## 17 545 **Competing Interests**

18  
19  
20  
21 546 We have read and understood BMJ policy on declaration of interests and declare that we have no  
22  
23 547 competing interests.  
24

25 548

## 26 27 549 **Authors Contributions**

28  
29  
30  
31 550 LD, SG and JP were all involved in the search, screening and analysis of research articles. IB provided  
32  
33 551 technical oversight and expertise throughout the screening processes. All authors contributed to the  
34  
35 552 content, drafting, review and revisions to the manuscript.  
36

## 37 553 **Data Sharing Statement**

38  
39  
40  
41 554 Supplementary files as listed in the main manuscript are available to the reader. There is no other  
42  
43 555 unpublished data that links to this research.  
44  
45

## 46 47 556 **Supporting Information**

48  
49  
50  
51 557 **S1 Table. List of publications included in the review by typology**

52  
53 558 **S2 Table. Supplementary and detailed data for 'learning and evaluation' original research publications.**

54  
55  
56 559 **S3 Table. Supplementary and detailed data for 'assessments' original research publications**  
57  
58  
59

1  
2  
3 560 **S4 Table. Supplementary and detailed data for 'HRCS methods for implementation' original research**  
4  
5 561 **publications.**

6  
7 562 **S5 Table. Supplementary and detailed data for 'Evidence synthesis for RCS implementation and evaluation'**  
8  
9 563 **original research publications.**

10  
11 564 **S6 Table. Supplementary and detailed data for 'miscellaneous' publications.**

12  
13 565 **S7 Table. Supplementary and detailed data for 'Perspective, Opinion & Commentary' publications.**

14  
15 566 **S8 Table. Supplementary and detailed data for 'systematic review' publications.**

16  
17 567 **S9 Table. HRCS definitions, sources and citing papers<sup>1</sup>.** 1. Numbered citations in italics pertain to the  
18 568 reference list in Supplementary Table 1. Numbered citations in normal (non-italicised) font are listed below. 2.  
19 569 Presented as a definition of 'Health Systems Research' capacity. 3. Presented as a definition of 'research  
20 570 capacity' in citing publication, but included in the 'health research capacity' definition list as contains specific  
21 571 reference to 'health research'. 4. Cited as definition of 'health' research capacity in [123]. 5. Presented as a  
22 572 definition of 'capacity' in citing publication, but included in the 'research capacity' definition list as contains  
23 573 specific reference to 'research'  
24 574

25  
26 575 **S10 Table. Content analysis of capacity definitions by capacity term<sup>1</sup>.** 1. Numbered citations pertain to the  
27 576 reference list in Supplementary Table 1. 2. The content of each definition was independently coded according  
28 577 to the following criteria: explicit reference to individual (ind.), institutional (Ins.) or environmental (Env.) level  
29 578 capacity strengthening; explicit reference to strengthening capacity in terms of defining research questions or  
30 579 identifying research priorities (Def.), conducting research or applying research methods (Car.) or  
31 580 communicating and applying research outcomes (App.); explicit reference to facilitating an improvement in  
32 581 research abilities/quality (Qua.) sustainability (Sus.), reference to HRCS as a process (Pro.) and/or HRCS as a  
33 582 continuous activity (Con.).  
34 583

35  
36  
37  
38  
39  
40 584  
41  
42  
43  
44  
45  
46  
47  
48  
49  
50  
51  
52  
53  
54  
55  
56  
57  
58  
59  
60

## Supplementary Table 1. List of publications included in the review by typology

## Original Research: Learning &amp; Evaluation

1. Abawi K, Chandra-Mouli V, Toskin I, Festin MP, Gertiser L, Idris R, Hamamy H, Ali M, Bonventure AM, Temmerman M *et al*: **E-learning for research capacity strengthening in sexual and reproductive health: The experience of the Geneva Foundation for Medical Education and Research and the Department of Reproductive Health and Research, World Health Organization.** *Human resources for health* 2016, **14**(1).
2. Aidam J, Sombie I: **The West African Health Organization's experience in improving the health research environment in the ECOWAS region.** *Health research policy and systems* 2016, **14**:30.
3. Atkins S, Yan W, Meragia E, Mahomed H, Rosales-Klantz S, Skinner D, Zwarenstein M: **Student experiences of participating in five collaborative blended learning courses in Africa and Asia: a survey.** *Global health action* 2016, **9**:28145.
4. Byrne E, Donaldson L, Manda-Taylor L, Brugha R, Matthews A, MacDonald S, Mwapasa V, Petersen M, Walsh A: **The use of technology enhanced learning in health research capacity development: lessons from a cross country research partnership.** *Globalization and health* 2016, **12**(19):
5. Cole DC, Nyirenda LJ, Fazal N, Bates I: **Implementing a national health research for development platform in a low-income country - a review of Malawi's Health Research Capacity Strengthening Initiative.** *Health research policy and systems* 2016, **14**(24):
6. Elmusharaf K, Tahir H, D OD, Brugha R, Homeida M, Abbas AM, Byrne E: **From local to global: a qualitative review of the multi-leveled impact of a multi-country health research capacity development partnership on maternal health in Sudan.** *Globalization and health* 2016, **12**(1):20.
7. Farnman R, Diwan V, Zwarenstein M, Atkins S: **Successes and challenges of north-south partnerships - key lessons from the African/Asian Regional Capacity Development projects.** *Global health action* 2016, **9**:30522.
8. Kaser M, Maure C, Halpaap BM, Vahedi M, Yamaka S, Launois P, Casamitjana N: **Research Capacity Strengthening in Low and Middle Income Countries - An Evaluation of the WHO/TDR Career Development Fellowship Programme.** *PLoS neglected tropical diseases* 2016, **10**(5):e0004631.
9. Mahendradhata Y, Nabieva J, Ahmad RA, Henley P, Launois P, Merle C, Maure C, Horstick O, Elango V: **Promoting good health research practice in low- and middle-income countries.** *Global health action* 2016, **9**:32474.
10. Protsiv M, Atkins S: **The experiences of lecturers in African, Asian and European universities in preparing and delivering blended health research methods courses: a qualitative study.** *Global health action* 2016, **9**:28149.
11. Protsiv M, Rosales-Klantz S, Bwanga F, Zwarenstein M, Atkins S: **Blended learning across universities in a South-North-South collaboration: a case study.** *Health research policy and systems* 2016, **14**(67):
12. Thomson DR, Semakula M, Hirschhorn LR, Murray M, Ndahindwa V, Manzi A, Mukabutera A, Karema C, Condo J, Hedt-Gauthier B: **Applied statistical training to strengthen analysis and health research capacity in Rwanda.** *Health research policy and systems* 2016, **14**(1).
13. Varshney D, Atkins S, Das A, Diwan V: **Understanding collaboration in a multi-national research capacity-building partnership: a qualitative study.** *Health research policy and systems* 2016, **14**(1):64.
14. Ager A, Zarowsky C: **Balancing the personal, local, institutional, and global: multiple case study and multidimensional scaling analysis of African experiences in addressing complexity and political economy in health research capacity strengthening.** *Health research policy and systems* 2015, **13**(5):
15. Daniels J, Nduati R, Kiarie J, Farquhar C: **Supporting early career health investigators in Kenya: a qualitative study of HIV/AIDS research capacity building.** *Pan African Medical Journal* 2015, **20**:192-192.
16. Dean L, Njelesani J, Smith H, Bates I: **Promoting sustainable research partnerships: a mixed-method evaluation of a United Kingdom-Africa capacity strengthening award scheme.** *Health research policy and systems* 2015, **13**(81):
17. Heller RF, Machingura PI, Musa BM, Paramita S, Myles P: **Mobilising the alumni of a Master of Public Health degree to build research and development capacity in low- and middle-income settings: the Peoples-uni.** *Health research policy and systems* 2015, **13**(71):
18. Ndebele P, Wassenaar D, Benatar S, Fleischer T, Kruger M, Adebamowo C, Kass N, Hyder AA: **Research ethics capacity building in sub-saharan Africa: A review of NIH fogarty-funded programs 2000-2012.** *Journal of Empirical Research on Human Research Ethics* 2014, **9**(2):24-40.

19. Saenz C, Heitman E, Luna F, Litewka S, Goodman KW, Macklin R: **Twelve years of fogarty-funded bioethics training in latin America and the caribbean: Achievements and challenges.** *Journal of Empirical Research on Human Research Ethics* 2014, **9**(2):80-91.
20. Zachariah R, Guillermin N, Berger S, Kumar AMV, Satyanarayana S, Bissell K, Edginton M, Hinderaker SG, Tayler-Smith K, Bergh Rvd *et al*: **Research to policy and practice change: is capacity building in operational research delivering the goods?** *Tropical Medicine and International Health* 2014, **19**(9):1068-1075.
21. Bennett S, Paina L, Ssengooba F, Waswa D, M'Imunya JM: **Mentorship in African health research training programs: an exploratory study of Fogarty International Center Programs in Kenya and Uganda.** *Education for health (Abingdon, England)* 2013, **26**(3):183-187.
22. Bennett S, Paina L, Ssengooba F, Waswa D, M'Imunya JM: **The impact of Fogarty International Center research training programs on public health policy and program development in Kenya and Uganda.** *BMC public health* 2013, **13**(770):
23. Marjanovic S, Hanlin R, Diepeveen S, Chataway J: **Research capacity-building in Africa: Networks, institutions and local ownership.** *Journal of International Development* 2013, **25**(7):936-946.
24. Miiro GM, Oukem-Boyer OO, Sarr O, Rahmani M, Ntoumi F, Dheda K, Pym A, Mboup S, Kaleebu P: **EDCTP regional networks of excellence: initial merits for planned clinical trials in Africa.** *BMC public health* 2013, **13**:258.
25. Vian T, Koseki S, Feeley FG, Beard J: **Strengthening capacity for AIDS vaccine research: analysis of the Pfizer Global Health Fellows Program and the International AIDS Vaccine Initiative.** *BMC health services research* 2013, **13**(378):
26. Wilson LL, Rice M, Jones CT, Joiner C, Laborde J, McCall K, Jester PM, Carter SC, Boone C, Onwuzuligbo U *et al*: **Enhancing research capacity for global health: Evaluation of a distance-based program for international study coordinators.** *Journal of Continuing Education in the Health Professions* 2013, **33**(1):67-75.
27. Bennett S, Corluka A, Doherty J, Tangcharoensathien V: **Approaches to developing the capacity of health policy analysis institutes: a comparative case study.** *Health research policy and systems* 2012, **10**(7):
28. Bissell K, Harries AD, Reid AJ, Edginton M, Hinderaker SG, Satyanarayana S, Enarson DA, Zachariah R: **Operational research training: the course and beyond.** *Public health action* 2012, **2**(3):92-97.
29. Redman-Maclaren M, MacLaren DJ, Harrington H, Asugeni R, Timothy-Harrington R, Kekeubata E, Speare R: **Mutual research capacity strengthening: a qualitative study of two-way partnerships in public health research.** *International journal for equity in health* 2012, **11**(79):
30. Mahmood S, Hort K, Ahmed S, Salam M, Cravioto A: **Strategies for capacity building for health research in Bangladesh: Role of core funding and a common monitoring and evaluation framework.** *Health research policy and systems* 2011, **9**.
31. Minja H, Nsanzabana C, Maure C, Hoffmann A, Rumisha S, Ogundahunsi O, Zicker F, Tanner M, Launois P: **Impact of health research capacity strengthening in low- and middle-income countries: the case of WHO/TDR programmes.** *PLoS neglected tropical diseases* 2011, **5**(10):e1351-e1351.
32. Goto A, Nguyen Quang V, Nguyen Thi Tu V, Yokokawa H, Yasumura S, Nguyen Thy K: **Epidemiology research training in Vietnam: evaluation at the five year mark.** *Fukushima journal of medical science* 2010, **56**(1):63-70.
33. Mayhew SH, Doherty J, Pitayarangsarit S: **Developing health systems research capacities through north-south partnership: an evaluation of collaboration with South Africa and Thailand.** *Health research policy and systems* 2008, **6**(8):
34. Jönsson K, Tomson G, Jönsson C, Kounnavong S, Wahlström R: **Health systems research in Lao PDR: capacity development for getting research into policy and practice.** *Health research policy and systems* 2007, **5**(11):
35. Hyder AA, Akhter T, Qayyum A: **Capacity development for health research in Pakistan: The effects of doctoral training.** *Health policy and planning* 2003, **18**(3):338-343.
36. Jentsch B, Pilley C: **Research relationships between the South and the North: Cinderella and the ugly sisters?** *Social Science and Medicine* 2003, **57**(10):1957-1967.

#### Original Research: Assessment

37. Erasmus E, Lehmann U, Agyepong IA, Alwar J, de Savigny D, Kamuzora P, Mirzoev T, Nxumalo N, Tomson G, Uzochukwu B *et al*: **Strengthening post-graduate educational capacity for health policy and systems**

- 1  
2  
3 research and analysis: the strategy of the Consortium for Health Policy and Systems Analysis in Africa. *Health research policy and systems* 2016, **14**:29.
- 4  
5 38. Uzochukwu B, Mbachu C, Onwujekwe O, Okwuosa C, Etiaba E, Nyström ME, Gilson L: **Health policy and**
- 6 **systems research and analysis in Nigeria: examining health policymakers' and researchers' capacity**
- 7 **assets, needs and perspectives in south-east Nigeria.** *Health research policy and systems* 2016, **14**(13):
- 8 39. Agyepong IA, Anniah K, Aikins M, Akweongo P, Esena R, Mirzoev T: **Health Policy, Health Systems**
- 9 **Research and Analysis Capacity Assessment of the School of Public Health, University of Ghana.** *Ghana*
- 10 *medical journal* 2015, **49**(3):200-213.
- 11 40. Motari M, Ota MO, Kirigia JM: **Readiness of ethics review systems for a changing public health landscape**
- 12 **in the WHO African Region Ethics in Biomedical Research.** *BMC medical ethics* 2015, **16**(1).
- 13 41. Oliver S, Bangpan M, Stansfield C, Stewart R: **Capacity for conducting systematic reviews in low- and**
- 14 **middle-income countries: a rapid appraisal.** *Health research policy and systems* 2015, **13**(23):
- 15 42. Ekeroma AJ, Kenealy T, Shulruf B, McCowan LM, Hill A: **Building reproductive health research and audit**
- 16 **capacity and activity in the pacific islands (BRRACAP) study: Methods, rationale and baseline results.**
- 17 *BMC medical education* 2014, **14**(1).
- 18 43. Haafkens J, Blomstedt Y, Eriksson M, Becher H, Ramroth H, Kinsman J: **Training needs for research in**
- 19 **health inequities among health and demographic researchers from eight African and Asian countries.**
- 20 *BMC public health* 2014, **14**(1254):
- 21 44. Kanoute A, Faye D, Bourgeois D: **Strategies to promote better research on oral health in Africa: a Delphi**
- 22 **consensus study.** *Contemporary clinical dentistry* 2014, **5**(1):13-19.
- 23 45. Kebede D, Zielinski C, Mbondji PE, Sanou I, Kouvididila W, Lusamba-Dikassa PS: **Human resources in health**
- 24 **research institutions in sub-Saharan African countries: results of a questionnaire-based survey.** *Journal*
- 25 *of the Royal Society of Medicine* 2014, **107**(Suppl. 1):85-95.
- 26 46. Kilic B, Phillimore P, Islek D, Oztoprak D, Korkmaz E, Abu-Rmeileh N, Zaman S, Unal B: **Research capacity**
- 27 **and training needs for non-communicable diseases in the public health arena in Turkey.** *BMC health*
- 28 *services research* 2014, **14**:373.
- 29 47. Mirzoev T, Lê G, Green A, Orgill M, Komba A, Esena RK, Nyapada L, Uzochukwu B, Amde WK, Nxumalo N *et*
- 30 *al*: **Assessment of capacity for Health Policy and Systems Research and Analysis in seven African**
- 31 **universities: results from the CHEPSAA project.** *Health policy and planning* 2014, **29**(7):831-841.
- 32 48. Simba D, Mukose A, Bazeyo W: **Institutional capacity for health systems research in East and Central**
- 33 **African schools of public health: strengthening human and financial resources.** *Health research policy*
- 34 *and systems* 2014, **12**(23):
- 35 49. Franzen SR, Chandler C, Enquesselassie F, Siribaddana S, Atashili J, Angus B, Lang T: **Understanding the**
- 36 **investigators: a qualitative study investigating the barriers and enablers to the implementation of local**
- 37 **investigator-initiated clinical trials in Ethiopia.** *BMJ open* 2013, **3**(11):e003616.
- 38 50. Hofman K, Blomstedt Y, Addei S, Kalage R, Maredza M, Sankoh O, Bangha M, Kahn K, Becher H, Haafkens J
- 39 *et al*: **Addressing research capacity for health equity and the social determinants of health in three**
- 40 **African countries: the INTREC programme.** *Global health action* 2013, **6**(1):19668.
- 41 51. Nachege JB, Uthman OA, Ho Y, Lo M, Anude C, Kayembe P, Wabwire-Mangen F, Gomo E, Sow PS, Obike U
- 42 *et al*: **Current status and future prospects of epidemiology and public health training and research in the**
- 43 **WHO African region.** *International journal of epidemiology* 2012, **41**(6):1829-1846.
- 44 52. Paulus JK, Santoyo-Vistrain R, Havelick D, Cohen A, Kalyesubula R, Ajayi IO, Mattsson JG, Adami HO, Dalal
- 45 S: **Global teaching and training initiatives for emerging cohort studies.** *Journal of epidemiology and*
- 46 *global health* 2012, **2**(3):125-133.
- 47 53. Peykari N, Djalalinia S, Owlia P, Habibi E, Falahat K, Ghanei M, Malekafzali H, Baradaran Eftekhari M: **Health**
- 48 **research system evaluation in I.R. of Iran.** *Archives of Iranian medicine* 2012, **15**(7):394-399.
- 49 54. Keshavarz Mohammadi N, Zaree F, de Leeuw E, Emamjomeh MM: **Share of nations in 37 international**
- 50 **public health journals: An equity and diversity perspective towards health research capacity building.**
- 51 *Iranian journal of public health* 2011, **40**(4):129-137.
- 52 55. Magesa SM, Mwape B, Mboera LE: **Challenges and opportunities in building health research capacity in**
- 53 **Tanzania: a case of the National Institute for Medical Research.** *Tanzania journal of health research* 2011,
- 54 **13**(5):427-443.
- 55 56. Nakanjako D, Byakika-Kibwika P, Kintu K, Aizire J, Nakwagala F, Luzige S, Namisi C, Mayanja-Kizza H, Kamya
- 56 MR: **Mentorship needs at academic institutions in resource-limited settings: A survey at makerere**
- 57 **university college of health sciences.** *BMC medical education* 2011, **11**(1).
- 58 57. Pepping F: **The current capacity for training in public health nutrition in West Africa.** *Global public health*
- 59 2010, **5**(Suppl. 1):S20-S41.
- 60

- 1  
2  
3  
4  
5  
6  
7  
8  
9  
10  
11  
12  
13  
14  
15  
16  
17  
18  
19
58. Redman-MacLaren ML, MacLaren DJ, Asugeni R, Fa'anuabae CE, Harrington H, Muse A, Speare R, Clough AR: **"We can move forward": challenging historical inequity in public health research in Solomon Islands.** *International journal for equity in health* 2010, **9**(25):
59. Nyika A, Kilama W, Chilengi R, Tangwa G, Tindana P, Ndebele P, Ikingura J: **Composition, training needs and independence of ethics review committees across Africa: Are the gate-keepers rising to the emerging challenges?** *Journal of medical ethics* 2009, **35**(3):189-193.
60. Malekafzali H, Eftekhari MB, Peykari N, Gholami FS, Djalali nia S, Owlia P, Habibi E, Mesgarpour B, Vasei M: **Research assessment of Iranian medical universities, an experience from a developing country.** *Iranian journal of public health* 2009, **38**(Suppl.1):47-49.
61. Moodley K, Myer L: **Health Research Ethics Committees in South Africa 12 years into democracy.** *BMC medical ethics* 2007, **8**.
62. Singh D: **Publication bias - A reason for the decreased research output in developing countries.** *South African Psychiatry Review* 2006, **9**(3):
63. Cuboni HD, Finau SA, Wainiqolo I, Cuboni G: **Fijian participation in health research: analysis of Medline publications 1965-2002.** *Pacific health dialog : a publication of the Pacific Basin Officers Training Program and the Fiji School of Medicine* 2004, **11**(1):59-78.

20  
21  
22

#### Original Research: HRCS Methods

- 23  
24  
25  
26  
27  
28  
29  
30  
31  
32  
33  
34  
35  
36  
37  
38  
39  
40
64. Murphy J, Hatfield J, Afsana K, Neufeld V: **Making a Commitment to Ethics in Global Health Research Partnerships: A Practical Tool to Support Ethical Practice.** *Journal of Bioethical Inquiry* 2015, **12**(1):137-146.
65. Bates I, Boyd A, Smith H, Cole DC: **A practical and systematic approach to organisational capacity strengthening for research in the health sector in Africa.** *Health research policy and systems* 2014, **12**(11):
66. Huber J, Bauer D, Hoelscher M, Kapungu J, Kroidl A, Lennemann T, Maganga L, Opitz O, Salehe O, Sigauke A *et al*: **Evaluation of health research capacity strengthening trainings on individual level: Validation of a questionnaire.** *Journal of evaluation in clinical practice* 2014, **20**(4):390-395.
67. Le G, Mirzoev T, Orgill M, Erasmus E, Lehmann U, Okeyo S, Goudge J, Maluka S, Uzochukwu B, Aikins M *et al*: **A new methodology for assessing health policy and systems research and analysis capacity in African universities.** *Health research policy and systems* 2014, **12**:59.
68. Jessani N, Lewy D, Ekirapa-Kiracho E, Bennett S: **Institutional capacity for health systems research in East and Central African schools of public health: experiences with a capacity assessment tool.** *Health research policy and systems* 2014, **12**(21):
69. Birch AP, Tuck J, Malata A, Gagnon AJ: **Assessing global partnerships in graduate nursing.** *Nurse education today* 2013, **33**(11):1288-1294.
70. Bates I, Akoto AY, Ansong D, Karikari P, Bedu-Addo G, Critchley J, Agbenyega T, Nsiah-Asare A: **Evaluating health research capacity building: an evidence-based tool.** *PLoS medicine* 2006, **3**(8):e299.

41  
42  
43

#### Original Research: HRCS Evidence Synthesis

- 44  
45  
46  
47  
48  
49  
50  
51  
52  
53  
54  
55  
56
71. Bates I, Boyd A, Aslanyan G, Cole DC: **Tackling the tensions in evaluating capacity strengthening for health research in low- and middle-income countries.** *Health policy and planning* 2015, **30**(3):334-344.
72. Cole DC, Boyd A, Aslanyan G, Bates I: **Indicators for tracking programmes to strengthen health research capacity in lower- and middle-income countries: a qualitative synthesis.** *Health research policy and systems* 2014, **12**(17):(12 A-(12 A.
73. Boyd A, Cole DC, Cho DB, Aslanyan G, Bates I: **Frameworks for evaluating health research capacity strengthening: a qualitative study.** *Health research policy and systems* 2013, **11**(46):
74. Gadsby EW: **Research capacity strengthening: donor approaches to improving and assessing its impact in low- and middle-income countries.** *International Journal of Health Planning and Management* 2011, **26**(1):89-106.
75. Edwards N, Webber J, Mill J, Kahwa E, Roelofs S: **Building capacity for nurse-led research.** *International nursing review* 2009, **56**(1):88-94.

57  
58  
59  
60

#### Original Research: Miscellaneous

- 1  
2  
3  
4 76. Cole DC, Johnson N, Mejia R, McCullough H, Turcotte-Tremblay AM, Barnoya J, Falabella Luco MS: **Mentoring health researchers globally: Diverse experiences, programmes, challenges and responses.** *Global public health* 2016, **11**(9):1093-1108.
- 5  
6  
7 77. Parker M, Kingori P: **Good and bad research collaborations: Researchers' views on science and ethics in global health research.** *PloS one* 2016, **11**(10).
- 8  
9 78. Muldoon KA, Birungi J, Berry NS, Ngolobe MH, Mwesigwa R, Shannon K, Moore DM: **Supporting southern-led research: Implications for north-south research partnerships.** *Canadian Journal of Public Health* 2012, **103**(2):128-131.
- 10  
11  
12 79. Nurse K, Wight D: **Development assistance and research capacity strengthening: the commissioning of health research in East Africa.** *Journal of Eastern African Studies* 2011, **5**(2):233-251.

#### 14 15 16 17 18 19 20 21 22 23 24 25 26 27 28 29 30 31 32 33 34 35 36 37 38 39 40 41 42 43 44 45 46 47 48 49 50 51 52 53 54 55 56 57 58 59 60

80. Atkins S, Marsden S, Diwan V, Zwarenstein M: **North-south collaboration and capacity development in global health research in low- and middle-income countries - the ARCADE projects.** *Global health action* 2016, **9**:30524.
81. Atkins S, Varshney D, Meragia E, Zwarenstein M, Diwan V: **'Research clinics': online journal clubs between south and north for student mentoring.** *Global health action* 2016, **9**:30434.
82. Bloomfield GS, Narayan KM, Sampson UK, Narula J: **What Defines a Valuable Investment in Global Health Research?** *Global heart* 2016, **11**(1):1-3.
83. Bloomfield GS, Xavier D, Belis D, Alam D, Davis P, Dorairaj P, Ghannem H, Gilman RH, Kamath D, Kimaiyo S *et al*: **Training and Capacity Building in LMIC for Research in Heart and Lung Diseases: The NHLBI-UnitedHealth Global Health Centers of Excellence Program.** *Global heart* 2016, **11**(1):17-25.
84. Cubaka VK, Schriver M, Kyamanywa P, Cotton P, Kallestrup P: **Capacity-building for equitable global health research from Africa: the power of two.** *International journal of public health* 2016, **61**(3):389-390.
85. Davies J, Mullan Z: **Research capacity in Africa--will the sun rise again?** *The Lancet Global health* 2016, **4**(5):e287.
86. Dossou JP, Assarag B, Delamou A, Van der Veken K, Belaid L, Ouedraogo M, Khalfallah S, Aouras H, Diadiou M, Fassassi R *et al*: **Switching the poles in sexual and reproductive health research: implementing a research capacity-strengthening network in West and North Africa.** *Reproductive health* 2016, **13**(1):91.
87. Hawkes S, Aulakh BK, Jadeja N, Jimenez M, Buse K, Anwar I, Barge S, Odubanjo MO, Shukla A, Ghaffar A *et al*: **Strengthening capacity to apply health research evidence in policy making: Experience from four countries.** *Health policy and planning* 2016, **31**(2):161-170.
88. Hyder AA, Norton R, Perez-Nunez R, Mojarro-Iniguez FR, Peden M, Kobusingye O: **The Road Traffic Injuries Research Network: a decade of research capacity strengthening in low- and middle-income countries.** *Health research policy and systems* 2016, **14**:14.
89. O'Connor S, Gallagher J, Wamba N, Moyo C, Chirambo GB, O'Donoghue J: **Establishing Long-Term Nursing Informatics Capacity in Malawi, Africa.** *Studies in health technology and informatics* 2016, **225**:1013-1014.
90. Osanjo GO, Oyugi JO, Kibwage IO, Mwanda WO, Ngugi EN, Otieno FC, Ndege W, Child M, Farquhar C, Penner J *et al*: **Building capacity in implementation science research training at the University of Nairobi.** *Implementation science : IS* 2016, **11**:30.
91. Sturke R, Vorkoper S, Duncan K, Levintova M, Parascondola M: **Addressing NCDs through research and capacity building in LMICs: lessons learned from tobacco control.** *Global health action* 2016, **9**:32407.
92. Winchester MS, BeLue R, Oni T, Wittwer-Backofen U, Deobagkar D, Onya H, Samuels TA, Matthews SA, Stone C, Airhihenbuwa C: **The Pan-University Network for Global Health: framework for collaboration and review of global health needs.** *Globalization and health* 2016, **12**:13.
93. Adanu R, Mbizvo MT, Baguiya A, Adam V, Ademe BW, Ankomah A, Aja GN, Ajuwon AJ, Esimai OA, Ibrahim T *et al*: **Sexual and Reproductive Health Research and Research Capacity Strengthening in Africa: Perspectives from the region.** *Reproductive health* 2015, **12**:64.
94. Airhihenbuwa CO, Ogedegbe G, Iwelunmor J, Jean-Louis G, Williams N, Zizi F, Okuyemi K: **Claim Your Space: Leadership Development as a Research Capacity Building Goal in Global Health.** *Health Education and Behavior* 2015, **43**:17S-24S.
95. Berman J, Mitambo C, Matanje-Mwagomba B, Khan S, Kachimanga C, Wroe E, Mwape L, Oosterhout Jv, Chindebvu G, Schoor Vv *et al*: **Building a knowledge translation platform in Malawi to support evidence-**

- 1  
2  
3 informed health policy. *Health research policy and systems* 2015, **13**(73):(8 December 2015)-(2018  
4 December 2015).
- 5 96. Cash-Gibson L, Guerra G, Salgado-de-Snyder VN: **SDH-NET: a South-North-South collaboration to build**  
6 **sustainable research capacities on social determinants of health in low- and middle-income countries.**  
7 *Health research policy and systems* 2015, **13**(45):(22 October 2015)-(2022 October 2015).
- 8 97. Cottler LB, Zunt J, Weiss B, Kamal AK, Vaddiparti K: **Building global capacity for brain and nervous system**  
9 **disorders research.** *Nature* 2015, **527**(7578):S207-213.
- 10 98. Kombe F: **Enhancing quality and integrity in biomedical research in Africa: An international call for**  
11 **greater focus, investment and standardisation in capacity strengthening for frontline staff.** *BMC medical*  
12 *ethics* 2015, **16**(1).
- 13 99. Koso-Thomas M, McClure EM, Belizán JM, Althabe F, Buekens PM, Tshefu A, Bose CL, Garces A, Hambidge  
14 KM, Krebs NF *et al*: **The Global Network for Women's and Children's Health Research: A model of**  
15 **capacity-building research.** *Seminars in Fetal and Neonatal Medicine* 2015, **20**(5):293-299.
- 16 100. Langlois EV, Ranson MK, Barnighausen T, Bosch-Capblanch X, Daniels K, El-Jardali F, Ghaffar A, Grimshaw J,  
17 Haines A, Lavis JN *et al*: **Advancing the field of health systems research synthesis.** *Systematic reviews*  
18 2015, **4**:90.
- 19 101. MacLaren D, Asugeni J, Redman-MacLaren M: **Strengthening research capacity in the Pacific: an example**  
20 **from the Atoifi Health Research Group, Solomon Islands.** *Australasian psychiatry : bulletin of Royal*  
21 *Australian and New Zealand College of Psychiatrists* 2015, **23**(6):42-44.
- 22 102. McGregor S, Henderson KJ, Kaldor JM: **Capacity building in longitudinal HIV research.** *The Lancet Global*  
23 *health* 2015, **3**(1):e18-19.
- 24 103. Miranda JJ, Bernabe-Ortiz A, Diez-Canseco F, Malaga G, Cardenas MK, Carrillo-Larco RM, Pesantes MA,  
25 Araya R, Boggio O, Checkley W *et al*: **Building a platform for translational research in chronic**  
26 **noncommunicable diseases to address population health: lessons from NHLBI supported CRONICAS in**  
27 **Peru.** *Global heart* 2015, **10**(1):13-19.
- 28 104. Adedokun B, Nyasulu P, Maseko F, Adedini S, Akinyemi J, Afolabi S, Wet Nd, Sulaimon A, Sambai C,  
29 Utembe W *et al*: **Sharing perspectives and experiences of doctoral fellows in the first cohort of**  
30 **Consortium for Advanced Research Training in Africa: 2011-2014.** *Global health action* 2014, **7**:25127-  
31 25127.
- 32 105. Anderson F, Donkor P, de Vries R, Appiah-Denkyira E, Dakpallah GF, Rominski S, Hassinger J, Lou A,  
33 Kwansah J, Moyer C *et al*: **Creating a charter of collaboration for international university partnerships:**  
34 **the Elmina Declaration for Human Resources for Health.** *Academic medicine : journal of the Association*  
35 *of American Medical Colleges* 2014, **89**(8):1125-1132.
- 36 106. Carothers CL, Heimbürger DC, Schlachter S, Gardner P, Primack A, Warner TL, Vermund SH: **Training**  
37 **programs within global networks: lessons learned in the fogarty international clinical research scholars**  
38 **and fellows program.** *American Journal of Tropical Medicine and Hygiene* 2014, **90**(1):173-179.
- 39 107. Chu KM, Jayaraman S, Kyamanywa P, Ntakiyiruta G: **Building Research Capacity in Africa: Equity and**  
40 **Global Health Collaborations.** *PLoS medicine* 2014, **11**(3).
- 41 108. Cole DC, Aslanyan G, Dunn A, Boyd A, Bates I: **Dilemmas of evaluation: Health research capacity**  
42 **initiatives.** *Bulletin of the World Health Organization* 2014, **92**(12):920-921.
- 43 109. Hanney SR, González-Block MA: **Four centuries on from Bacon: Progress in building health research**  
44 **systems to improve health systems?** *Health research policy and systems* 2014, **12**(1).
- 45 110. Harries AD, Marais B, Kool B, Ram S, Kumar AM, Gounder S, Viney K, Brostrom R, Roseveare C, Bissell K *et*  
46 *al*: **Mentorship for operational research capacity building: hands-on or hands-off?** *Public health action*  
47 2014, **4**(Suppl 1):S56-58.
- 48 111. Kabiru CW, Izugbara CO, Wairimu J, Amendah D, Ezeh AC: **Strengthening local health research capacity in**  
49 **Africa: the African Doctoral Dissertation Research Fellowship Program.** *The Pan African medical journal*  
50 2014, **17**:1.
- 51 112. Klinkenberg E, Assefa D, Rusen ID, Dlodlo RA, Shimeles E, Kebede B, Fiseha D, Tsegaye F, Leimane I, Teklai  
52 Y *et al*: **The Ethiopian initiative to build sustainable capacity for operational research: overview and**  
53 **lessons learned.** *Public health action* 2014, **4**(Suppl 3):S2-7.
- 54 113. Mandala WL, Cowan FM, Lalloo DG, Wilkinson RJ, Kelly P, Chidzonga MM, Michelo C, Gomo E, Bailey R,  
55 Simuyemba M *et al*: **Southern Africa consortium for research excellence (SACORE): successes and**  
56 **challenges.** *The Lancet Global health* 2014, **2**(12):e691-692.
- 57 114. Pratt B, Loff B: **A framework to link international clinical research to the promotion of justice in global**  
58 **health.** *Bioethics* 2014, **28**(8):387-396.
- 59  
60



- 1  
2  
3 115.Ramsay A, Harries AD, Zachariah R, Bissell K, Hinderaker SG, Edginton M, Enarson DA, Satyanarayana S,  
4 Kumar AM, Hoa NB *et al*: **The Structured Operational Research and Training Initiative for public health**  
5 **programmes**. *Public health action* 2014, **4**(2):79-84.
- 6 116.Sweetland AC, Oquendo MA, Sidat M, Santos PF, Vermund SH, Duarte CS, Arbuckle M, Wainberg ML:  
7 **Closing the mental health gap in low-income settings by building research capacity: perspectives from**  
8 **Mozambique**. *Annals of global health* 2014, **80**(2):126-133.
- 9 117.Ekeroma A: **Building clinical research capacity in the Pacific Islands**. *Journal of primary health care* 2013,  
10 **5**(3):257-258.
- 11 118.Noormahomed EV, Mocumbi AO, Preziosi M, Damasceno A, Bickler S, Smith DM, Funzamo C, Aronoff-  
12 Spencer E, Badaro R, Mabila F *et al*: **Strengthening research capacity through the medical education**  
13 **partnership initiative: the Mozambique experience**. *Human resources for health* 2013, **11**:62.
- 14 119.Pratt B, Loff B: **Linking research to global health equity: the contribution of product development**  
15 **partnerships to access to medicines and research capacity building**. *American journal of public health*  
16 2013, **103**(11):1968-1978.
- 17 120.Sanchez AL, Canales M, Enriquez L, Zelaya AA, Espinoza VE, Fontecha GA: **Research capacity strengthening**  
18 **in Honduras**. *The Lancet Global health* 2013, **1**(2):e75.
- 19 121.Sanchez AL, Canales M, Enriquez L, Bottazzi ME, Zelaya AA, Espinoza VE, Fontecha GA: **A research capacity**  
20 **strengthening project for infectious diseases in Honduras: experience and lessons learned**. *Global health*  
21 *action* 2013, **6**:21643-21643.
- 22 122.Shaji KS: **Capacity building in mental health research: The way forward**. *Indian journal of psychological*  
23 *medicine* 2013, **35**(3):302-304.
- 24 123.Vasquez EE, Hirsch JS, Giang le M, Parker RG: **Rethinking health research capacity strengthening**. *Global*  
25 *public health* 2013, **8 Suppl 1**:S104-124.
- 26 124.Aikins AdG, Arhinful DK, Pitchforth E, Ogedegbe G, Allotey P, Agyemang C: **Establishing and sustaining**  
27 **research partnerships in Africa: a case study of the UK-Africa Academic Partnership on Chronic Disease**.  
28 *Globalization and health* 2012, **8**(29):
- 29 125.Greenwood B, Bhasin A, Targett G: **The Gates Malaria Partnership: a consortium approach to malaria**  
30 **research and capacity development**. *Tropical Medicine and International Health* 2012, **17**(5):558-563.
- 31 126.Ijsselmuiden C, Marais DL, Becerra-Posada F, Ghannem H: **Africa's neglected area of human resources for**  
32 **health research - the way forward**. *South African Medical Journal* 2012, **102**(4):228-233.
- 33 127.Kasonde JM, Campbell S: **Creating a Knowledge Translation Platform: nine lessons from the Zambia**  
34 **Forum for Health Research**. *Health research policy and systems* 2012, **10**:31.
- 35 128.McKee M, Stuckler D, Basu S: **Where there is no health research: What can be done to fill the global gaps**  
36 **in health research?** *PLoS medicine* 2012, **9**(4).
- 37 129.Nwaka S, Ochem A, Besson D, Ramirez B, Fakorede F, Botros S, Inyang U, Mgone C, Adae-Mensah I, Konde  
38 V *et al*: **Analysis of pan-African Centres of excellence in health innovation highlights opportunities and**  
39 **challenges for local innovation and financing in the continent**. *BMC international health and human*  
40 *rights* 2012, **12**(1).
- 41 130.Osei-Atweneboana MY, Lustigman S, Prichard RK, Boatman BA, Basanez MG: **A research agenda for**  
42 **helminth diseases of humans: health research and capacity building in disease-endemic countries for**  
43 **helminthiasis control**. *PLoS neglected tropical diseases* 2012, **6**(4):e1602.
- 44 131.Pinto RM, Da Silva SB, Penido C, Spector AY: **International participatory research framework:**  
45 **Triangulating procedures to build health research capacity in Brazil**. *Health promotion international*  
46 2012, **27**(4):435-444.
- 47 132.Thornicroft G, Cooper S, Bortel TV, Kakuma R, Lund C: **Capacity building in global mental health research**.  
48 *Harvard review of psychiatry* 2012, **20**(1):13-24.
- 49 133.Airhihenbuwa CO, Shisana O, Zungu N, BeLue R, Makofani DM, Shefer T, Smith E, Simbayi L: **Research**  
50 **capacity building: a US-South African partnership**. *Global health promotion* 2011, **18**(2):35-94.
- 51 134.Farquhar C, Nathanson N: **The Afya Bora Consortium: An Africa-US Partnership to Train Leaders in Global**  
52 **Health**. *Infectious disease clinics of North America* 2011, **25**(2):399-409.
- 53 135.Forde M, Morrison K, Dewailly E, Badrie N, Robertson L: **Strengthening integrated research and capacity**  
54 **development within the Caribbean region**. *BMC international health and human rights* 2011, **11**(Suppl.  
55 2):S7-S7.
- 56 136.Gezmu M, Degruittola V, Dixon D, Essex M, Halloran E, Hogan J, Grobler A, Kim S, McDermott J, McKaig R  
57 *et al*: **Strengthening biostatistics resources in sub-Saharan Africa: Research collaborations through U.S.**  
58 **partnerships**. *Statistics in medicine* 2011, **30**(7):695-708.
- 59  
60

- 1  
2  
3  
4  
5  
6  
7  
8  
9  
10  
11  
12  
13  
14  
15  
16  
17  
18  
19  
20  
21  
22  
23  
24  
25  
26  
27  
28  
29  
30  
31  
32  
33  
34  
35  
36  
37  
38  
39  
40  
41  
42  
43  
44  
45  
46  
47  
48  
49  
50  
51  
52  
53  
54  
55  
56  
57  
58  
59  
60
137. Kariuki T, Phillips R, Njenga S, Olesen OF, Klatser PR, Porro R, Lock S, Cabral MH, Gliber M, Hanne D: **Research and capacity building for control of neglected tropical diseases: the need for a different approach.** *PLoS neglected tropical diseases* 2011, **5**(5):e1020.
138. Laabes EP, Desai R, Zawedde SM, Glew RH: **How much longer will Africa have to depend on western nations for support of its capacity-building efforts for biomedical research?** *Tropical Medicine and International Health* 2011, **16**(3):258-262.
139. Manabe YC, Katabira E, Brough RL, Coutinho AG, Sewankambo N, Merry C: **Developing independent investigators for clinical research relevant for Africa.** *Health research policy and systems* 2011, **9**(44):
140. Wilson ME, Ko AI, Reis MG: **Collaborative teaching and learning: a model for building capacity and partnerships to address NTDs.** *PLoS neglected tropical diseases* 2011, **5**(3):e939-e939.
141. Brown KH, McLachlan M, Cardoso P, Tchibindat F, Baker SK: **Strengthening public health nutrition research and training capacities in West Africa: Report of a planning workshop convened in Dakar, Senegal, 26-28 March 2009.** *Global public health* 2010, **5** Suppl 1:S1-19.
142. Ezeh AC, Izugbara CO, Kabiru CW, Fonn S, Kahn K, Manderson L, Undieh AS, Omigbodun A, Thorogood M: **Building capacity for public and population health research in Africa: The consortium for advanced research training in Africa (CARTA) model.** *Global health action* 2010, **3**(1).
143. Kabiru CW, Izugbara CO, Wambugu SW, Ezeh AC: **Capacity development for health research in Africa: experiences managing the African Doctoral Dissertation Research Fellowship Program.** *Health research policy and systems* 2010, **8**(21):
144. Kutcher S, Horner B, Cash C, Lopez MF, Pascual MA: **Building psychiatric clinical research capacity in low and middle income countries: The Cuban-Canadian partnership project.** *Innovation Journal* 2010, **15**(1):1-10.
145. Lazarus JV, Wallace SA, Liljestrand J: **Improving African health research capacity.** *Scandinavian journal of public health* 2010, **38**(6):670-671.
146. Maher D, Biraro S, Hosegood V, Isingo R, Lutalo T, Mushati P, Ngwira B, Nyirenda M, Todd J, Zaba B: **Translating global health research aims into action: the example of the ALPHA network.** *Tropical Medicine and International Health* 2010, **15**(3):321-328.
147. Ntoumi F: **Networking and capacity building for health research in central Africa.** *Wiener klinische Wochenschrift* 2010, **122**(SUPPL. 1):23-26.
148. Zumla A, Huggett J, Dheda K, Green C, Kapata N, Mwaba P: **Trials and tribulations of an African-led research and capacity development programme: the case for EDCTP investments.** *Tropical Medicine and International Health* 2010, **15**(4):489-494.
149. Coloma J, Harris E: **From construction workers to architects: developing scientific research capacity in low-income countries.** *PLoS biology* 2009, **7**(7):e1000156.
150. Kilama W: **From research to control: Translating research findings into health policies, operational guidelines and health products.** *Acta tropica* 2009, **112**(SUPPL. 1).
151. Kilama WL: **The 10/90 gap in sub-Saharan Africa: Resolving inequities in health research.** *Acta tropica* 2009, **112**(SUPPL. 1).
152. Hussein G: **The Sudan experience.** *Journal of Academic Ethics* 2008, **6**(4):289-293.
153. Kumar N, Ravindran GD, Bhan A, Srivastava JS, Nair VM: **The India experience.** *Journal of Academic Ethics* 2008, **6**(4):295-303.
154. Malomo AO, Ogundiran TO, Jegede A, Adejumo A: **The Nigeria experience.** *Journal of Academic Ethics* 2008, **6**(4):305-309.
155. Sheikh S: **The Pakistan experience.** *Journal of Academic Ethics* 2008, **6**(4):283-287.
156. Tindana P, Boateng O: **The Ghana experience.** *Journal of Academic Ethics* 2008, **6**(4):277-281.
157. Upshur REG: **Introduction.** *Journal of Academic Ethics* 2008, **6**(4):271-275.
158. Whitworth JAG, Kokwaro G, Kinyanjui S, Snewin VA, Tanner M, Walport M, Sewankambo N: **Strengthening capacity for health research in Africa.** *Lancet (British edition)* 2008, **372**(9649):1590-1593.
159. Nuyens Y: **10 best resources for ... health research capacity strengthening.** *Health policy and planning* 2007, **22**(4):274-276.
160. Schulz-Baldes A, Vayena E, Biller-Andorno N: **Sharing benefits in international health research. Research-capacity building as an example of an indirect collective benefit.** *EMBO reports* 2007, **8**(1):8-13.
161. Stillman F, Yang G, Figueiredo V, Hernandez-Avila M, Samet J: **Building capacity for tobacco control research and policy.** *Tobacco control* 2006, **15**(Suppl.1):i18-i23.
162. Andruchow JE, Soskolne CL, Racioppi F, Bertollini R: **Capacity building for epidemiologic research: a case study in the newly independent state of Azerbaijan.** *Annals of epidemiology* 2005, **15**(3):228-231.

- 1  
2  
3 163.Goto A, Thi Ngoc Phuong N, Thi Mai Huong N, Hughes J: **Building postgraduate capacity in medical and public health research in Vietnam: An in-service training model.** *Public health* 2005, **119**(3):174-183.
- 4 164.Lansang MA, Dennis R: **Building capacity in health research in the developing world.** *Bulletin of the World Health Organization* 2004, **82**(10):764-770.
- 5  
6 165.Nchinda TC: **Research capacity strengthening in the South.** *Social Science & Medicine* 2002, **54**(11):1699-1711.
- 7  
8 166.Reddy P, Taylor SE, Sifunda S: **Research capacity building and collaboration between South African and American partners: The adaptation of an intervention model for HIV/AIDS prevention in corrections research.** *AIDS Education and Prevention* 2002, **14**(5 SUPPL.):92-102.
- 9  
10 167.Varkevisser CM, Mwaluko GMP, Grand LE: **Research in action: The training approach of the Joint Health Systems Research Project for the Southern African Region.** *Health policy and planning* 2001, **16**(3):281-291.
- 11  
12  
13  
14

#### 15 Systematic Review

- 16  
17  
18 168.Adedokun BO, Olopade CO, Olopade OI: **Building local capacity for genomics research in Africa: Recommendations from analysis of publications in Sub-Saharan Africa from 2004 to 2013.** *Global health action* 2016, **9**(1).
- 19  
20 169.Huber J, Nepal S, Bauer D, Wessels I, Fischer MR, Kiessling C: **Tools and instruments for needs assessment, monitoring and evaluation of health research capacity development activities at the individual and organizational level: A systematic review.** *Health research policy and systems* 2015, **13**(1).
- 21  
22 170.Mugabo L, Rouleau D, Odhiambo J, Nisingizwe MP, Amoroso C, Barebwanuwe P, Warugaba C, Habumugisha L, Hedt-Gauthier BL: **Approaches and impact of non-academic research capacity strengthening training models in sub-Saharan Africa: a systematic review.** *Health research policy and systems* 2015, **13**(30):
- 23  
24  
25  
26  
27 171.González-Block MA, Vargas-Riaño EM, Sonela N, Idrovo AJ, Ouwe-Missi-Oukem-Boyer O, Monot JJ: **Research capacity for institutional collaboration in implementation research on diseases of poverty.** *Tropical Medicine and International Health* 2011, **16**(10):1285-1290.
- 28  
29 172.San Sebastian M, Hurtig AK: **Review of health research on indigenous populations in Latin America, 1995-2004.** *Salud publica de Mexico* 2007, **49**(4):316-320.
- 30  
31  
32  
33  
34  
35  
36  
37  
38  
39  
40  
41  
42  
43  
44  
45  
46  
47  
48  
49  
50  
51  
52  
53  
54  
55  
56  
57  
58  
59  
60

1  
2  
3  
4  
5  
6  
7  
8  
9  
10  
11  
12  
13  
14  
15  
16  
17  
18  
19  
20  
21  
22  
23  
24  
25  
26  
27  
28  
29  
30  
31  
32  
33  
34  
35  
36  
37  
38  
39  
40  
41  
42  
43  
44  
45  
46  
47  
48  
49  
50  
51  
52  
53  
54  
55  
56  
57  
58  
59  
60

For peer review only

Supplementary Table 9. HRCS definitions, sources and citing papers<sup>1</sup>

| Subject Defined             | Capacity Term                | Definition & Source                                                                                                                                                                                                                                                                                                             | Cited In            |
|-----------------------------|------------------------------|---------------------------------------------------------------------------------------------------------------------------------------------------------------------------------------------------------------------------------------------------------------------------------------------------------------------------------|---------------------|
| Health<br>Research Capacity | Building [30]                | “an ability of individuals, organisations or systems to perform and utilise health research effectively, efficiently and sustainably” [70]                                                                                                                                                                                      | [30, 70]            |
|                             | Strengthening [70]           | “the ability to define problems, set objectives and priorities, build sustainable institutions and organisations, and identify solutions to key national health problems” [1]                                                                                                                                                   | [74, 126, 166]      |
|                             | Building [166]               | “a strategy that is implemented worldwide to improve the ability of developing countries to tackle the persistent and disproportionate burdens of disease they face” [2]                                                                                                                                                        | [123]               |
|                             | Strengthening [74, 126]      | “the process required for building capacity in health research would be define the institutional systems needed to support research, enumerate existing and missing resources and improve research support by addressing the identified gaps” [70]                                                                              | [45]                |
|                             | Strengthening                | “the level of expertise and resources needed for the production of new knowledge and its application” [3] <sup>2</sup>                                                                                                                                                                                                          | [48]                |
|                             | Development                  | “an approach to the development of sustainable skills, organisational structure, resources and commitment to health improvement...to multiply health gains many times over” [4] <sup>3</sup>                                                                                                                                    | [139]               |
|                             | Strengthening                | “a systematic, purposeful and goal-oriented effort to strengthen human resources and infrastructure to enable local scientists and institutions to become independent and responsive to existing and emerging health needs and threats” [97] <sup>2</sup>                                                                       | [97]                |
|                             | Building                     |                                                                                                                                                                                                                                                                                                                                 |                     |
| Research Capacity           | Building [164]               | “the ongoing process of empowering individuals, institutions, organisations, and nations to: define and prioritise problems systematically; develop and scientifically evaluate appropriate solutions; and share and apply the knowledge generated” [164] <sup>4</sup>                                                          | [29, 123, 159, 164] |
|                             | Strengthening [29, 123, 159] | “process of individual and institutional development which leads to higher levels of skills and greater ability to perform useful research” [5]                                                                                                                                                                                 | [16, 72]            |
|                             | Strengthening [16, 72]       | “the process by which individuals, organisations, and societies develop abilities (individually and collectively) to perform functions effectively, efficiently and in a sustainable manner to define problems, set objectives and priorities, build sustainable institutions and bring solutions to key national problems” [6] | [4, 31, 74]         |
|                             | Development [4]              | “the ability to conduct, manage, disseminate, and apply research in policy and practice” [132]                                                                                                                                                                                                                                  | [132]               |
|                             | Strengthening [31, 74]       | “Includes any efforts to increase the ability of individuals and institutions to undertake high-quality research and to engage with the wider community of stakeholders” [7]                                                                                                                                                    | [91, 96]            |
|                             | Building                     | “a long-term process that requires a systematic and inter-sectoral approach to developing appropriate regulatory frameworks, building and maintaining physical infrastructure, and investing in human resources, equipment and training in an environment conducive to research commitment and institutional support” [8]       | [130]               |

|                         |                                     |                                                                                                                                                                                                                                                                                                                                                                                                                             |            |
|-------------------------|-------------------------------------|-----------------------------------------------------------------------------------------------------------------------------------------------------------------------------------------------------------------------------------------------------------------------------------------------------------------------------------------------------------------------------------------------------------------------------|------------|
|                         | Strengthening                       | “consists of two main closely inter-related and inter-dependent activities, which, together, form the basis of institutional development. The two parts are: improving, through appropriate training, the capabilities of scientists to undertake quality research; improving institutional support – equipment, supplies and other logistic support to the institution in which the trained scientists have to work” [165] | [165]      |
|                         | Building                            | “strengthening the abilities of individuals, institutions, and countries to perform research functions, defining national problems and priorities, solving national problems, utilizing the results of research in policy making and programme delivery.” [9]                                                                                                                                                               | [46]       |
|                         | Strengthening                       | “goes beyond facilitating or funding a research project to the broader objectives of nurturing the prerequisites of the research process, such as state and institutional support, specialized training, infrastructural development, networking opportunities, publications and career paths.” [79]                                                                                                                        | [79]       |
|                         | Building                            | “a deliberate effort to augment health and social science research outputs as well as human capital, so as to favourably impact upon a research focus area” [166] <sup>5</sup>                                                                                                                                                                                                                                              | [166]      |
| Capacity                | Building                            | “a process that improves the ability of a person, group, organisation or system to meet its objectives or perform better” [10]                                                                                                                                                                                                                                                                                              | [25]       |
|                         | Building                            | “the process of helping communities and organisations harness human, technical and financial resources, which allows them to respond adequately to health issues in ways that inform such policies” [11]                                                                                                                                                                                                                    | [133]      |
|                         | Strengthening                       | “process through which people, organisations, and society as a whole are enabled to shape their own development and adapt it to changing conditions and frameworks” [12]                                                                                                                                                                                                                                                    | [66]       |
|                         | Strengthening                       | “process of improving individual skills, processes, and structures at the organisational level and the networks and context in which the organisation functions” [65]                                                                                                                                                                                                                                                       | [65]       |
|                         | Building                            | “helping recipient countries to invent, develop and maintain institutions and organisations which are capable of learning and bringing about their own transformation, so that they can play a dynamic role in supporting national development processes” [13]                                                                                                                                                              | [150]      |
|                         | Strengthening                       | “the ability of individuals or groups to perform tasks in a sustainable manner” [47]                                                                                                                                                                                                                                                                                                                                        | [47]       |
| Organisational capacity | Development                         | “the capacity of research departments in universities, think tanks and so on to fund, manage and maintain themselves” [14]                                                                                                                                                                                                                                                                                                  | [27]       |
| Progress                | Building [142]<br>Development [143] | “ability to understand, interpret, select, adapt, use, transmit, diffuse, produce and commercialise scientific and technological knowledge in ways appropriate to culture, aspirations and level of development” [15]                                                                                                                                                                                                       | [142, 143] |

1. Numbered citations in italics pertain to the reference list in Supplementary Table 1. Numbered citations in normal (non-italicised) font are listed below. 2. Presented as a definition of ‘Health Systems Research’ capacity. 3. Presented as a definition of ‘research capacity’ in citing publication, but included in the ‘health research capacity’ definition list as contains specific reference to ‘health research’. 4. Cited as definition of ‘health’ research capacity in [123]. 5. Presented as a definition of ‘capacity’ in citing publication, but included in the ‘research capacity’ definition list as contains specific reference to ‘research’

**List of References (not included in Supplementary Table 1)**

1. Global Forum for Health Research. The 10.90 report on health research. Geneva: Global Forum for Health Research, 2000.
2. Council on Health Research for Development. Beyond air: Research and innovation as key drivers for health, equity and development. Geneva: Council on Health Research for Development, 2012.
3. Block MAG, Mills A. Assessing capacity for health policy and systems research in low and middle income countries. *Health Research Policy and Systems*, 1(1), p.1. Health research policy and systems. 2003;1(1). doi: 10.1186/1478-4505-1-1.
4. Albert E, Mickan S. Closing the gap and widening the scope. New directions for research capacity building in primary health care. *Australian family physician*. 2003;32(12):1038-40, 43. PubMed PMID: 14708158.
5. Golenko X, Pager S, Holden L. A thematic analysis of the role of the organisation in building allied health research capacity: A senior managers perspective. *BMC health services research*. 2012;12(1). doi: 10.1186/1472-6963-12-276.
6. Global Forum for Health Research. The 10/90 Report on Health Research 2003-2004. Geneva: Global Forum for Health Research, 2004.
7. ESSENCE on Health Research. Seven principles for strengthening research capacity in low- and middle-income countries: simple ideas in a complex world. Geneva: TDR-ESSENCE on Health Research, 2014.
8. Volmink J, Dare L. Addressing inequalities in research capacity in Africa. *BMJ*. 2005;331(7519):705-6. doi: 10.1136/bmj.331.7519.705. PubMed PMID: 16195259; PubMed Central PMCID: PMCPMC1239957.
9. UNDP. Technical advisory paper, No:2. New York: UNDP, 1999.
10. LaFond AK, Brown L, Macintyre K. Mapping capacity in the health sector: a conceptual framework. *The International journal of health planning and management*. 2002;17(1):3-22. doi: 10.1002/hpm.649. PubMed PMID: 11963442.
11. Haines A, Sanders D. Building capacity to attain the Millennium Development Goals. *Trans R Soc Trop Med Hyg*. 2005;99(10):721-6. doi: 10.1016/j.trstmh.2005.06.010. PubMed PMID: 16029880.
12. Gesellschaft für Internationale Zusammenarbeit (GIZ). Capacity works. The Management Model for Sustainable Development. Eschborn: Gesellschaft für Internationale Zusammenarbeit (GIZ), 2011.
13. Depart of Economic and Social Affairs. Capacity-building for poverty eradication: Analysis of, and lessons from, evaluations of UN system support to countries' efforts. New York: United Nations, 2002.
14. DFID. Research Programme Consortia: Guidance note on capacity development. London: DFID, 2009.
15. Watson R, Crawford M, Farley S. Strategic approaches to science and technology in development. Geneva: World Bank, 2003.

Supplementary Table 10. Content analysis of capacity definitions by capacity term<sup>1</sup>

| Subject Defined          | Capacity Term                                | Content Domains <sup>2</sup> |      |      |      |      |      |     |      |      |     |
|--------------------------|----------------------------------------------|------------------------------|------|------|------|------|------|-----|------|------|-----|
|                          |                                              | Ind.                         | Ins. | Env. | Def. | Car. | App. | Qua | Sus. | Pro. | Con |
| Health Research Capacity | Building [139]                               | x                            | x    |      |      |      |      | x   |      | x    |     |
| Health Research Capacity | Building [97]                                | x                            | x    |      |      |      |      |     | x    |      |     |
| Research Capacity        | Building [132]                               |                              |      |      |      | x    | x    |     |      |      |     |
| Research Capacity        | Building [91, 96]                            | x                            | x    |      |      | x    | x    | x   |      |      |     |
| Research Capacity        | Building [130]                               | x                            | x    | x    |      |      |      |     |      | x    | x   |
| Research Capacity        | Building [46]                                | x                            | x    | x    | x    | x    | x    | x   |      |      |     |
| Research Capacity        | Building [166]                               | x                            |      |      |      | x    |      | x   |      |      |     |
| Capacity                 | Building [25]                                | x                            | x    | x    |      |      |      |     | x    |      | x   |
| Capacity                 | Building [133]                               |                              | x    | x    |      |      | x    |     |      | x    |     |
| Capacity                 | Building [150]                               |                              | x    | x    |      |      |      |     |      | x    |     |
| Progress                 | Building [142], Development [143]            |                              |      |      |      | x    | x    |     |      |      |     |
| Health Research Capacity | Building [30], Strengthening [70]            | x                            | x    | x    |      | x    | x    |     |      | x    |     |
| Health Research Capacity | Building [166], Strengthening [74, 126]      |                              | x    |      | x    | x    |      |     |      | x    |     |
| Research Capacity        | Building [164], Strengthening [29, 123, 159] | x                            | x    | x    | x    | x    | x    |     |      |      | x   |
| Health Research Capacity | Strengthening [123]                          |                              |      | x    |      |      |      | x   |      |      |     |
| Health Research Capacity | Strengthening [48]                           |                              |      |      |      | x    | x    |     |      |      |     |
| Research Capacity        | Strengthening [16, 72]                       | x                            | x    |      |      | x    |      | x   |      |      | x   |
| Research Capacity        | Strengthening [165]                          | x                            | x    |      |      | x    |      | x   |      |      |     |
| Research Capacity        | Strengthening [79]                           | x                            | x    | x    |      |      |      |     |      |      |     |
| Capacity                 | Strengthening [66]                           | x                            | x    | x    |      |      |      |     |      |      | x   |
| Capacity                 | Strengthening [65]                           | x                            | x    | x    |      |      |      | x   |      |      | x   |
| Capacity                 | Strengthening [47]                           | x                            |      |      |      | x    |      |     |      | x    |     |
| Research Capacity        | Development [4], Strengthening [31, 74]      | x                            | x    | x    | x    | x    | x    | x   | x    | x    | x   |
| Health Research Capacity | Development [45]                             |                              | x    |      |      |      |      | x   |      |      | x   |
| Organisational Capacity  | Development [27]                             |                              | x    |      |      |      |      |     |      | x    |     |
| Progress                 | Building [142], Development [143]            |                              |      |      |      | x    | x    |     |      |      |     |

1. Numbered citations pertain to the reference list in Supplementary Table 1. 2. The content of each definition was independently coded according to the following criteria: explicit reference to individual (ind.), institutional (ins.) or environmental (env.) level capacity strengthening; explicit reference to strengthening capacity in terms of defining research questions or identifying research priorities (Def.), conducting research or applying research methods (Car.) or communicating and applying research



1  
2  
3  
4  
5  
6  
7  
8  
9  
10  
11  
12  
13  
14  
15  
16  
17  
18  
19  
20  
21  
22  
23  
24  
25  
26  
27  
28  
29  
30  
31  
32  
33  
34  
35  
36  
37  
38  
39  
40  
41  
42  
43  
44  
45  
46  
47  
48  
49

outcomes (App.); explicit reference to facilitating an improvement in research abilities/quality (Qua.) sustainability (Sus.), reference to HRCS as a process (Pro.) and/or HRCS as a continuous activity (Con.).

For peer review only

# BMJ Open

**Advancing the science of health research capacity strengthening in low- and middle-income countries: A scoping review of the published literature, 2000-2016.**

|                                 |                                                                                                                                                                                                                                                                                                                              |
|---------------------------------|------------------------------------------------------------------------------------------------------------------------------------------------------------------------------------------------------------------------------------------------------------------------------------------------------------------------------|
| Journal:                        | <i>BMJ Open</i>                                                                                                                                                                                                                                                                                                              |
| Manuscript ID                   | bmjopen-2017-018718.R1                                                                                                                                                                                                                                                                                                       |
| Article Type:                   | Research                                                                                                                                                                                                                                                                                                                     |
| Date Submitted by the Author:   | 20-Sep-2017                                                                                                                                                                                                                                                                                                                  |
| Complete List of Authors:       | Dean, Laura; Liverpool School of Tropical Medicine, Department of International Public Health<br>Gregorius, Stefanie; Liverpool School of Tropical Medicine, Department of International Public Health<br>bates, imelda<br>Pulford, Justin; Liverpool School of Tropical Medicine, Department of International Public Health |
| <b>Primary Subject Heading</b>: | Global health                                                                                                                                                                                                                                                                                                                |
| Secondary Subject Heading:      | Evidence based practice                                                                                                                                                                                                                                                                                                      |
| Keywords:                       | Capacity Strengthening, LMIC, Scoping Review                                                                                                                                                                                                                                                                                 |
|                                 |                                                                                                                                                                                                                                                                                                                              |

SCHOLARONE™  
Manuscripts

1  
2  
3 **Title: Advancing the science of health research capacity strengthening in low- and middle-income**  
4  
5 **countries: A scoping review of the published literature, 2000-2016**  
6  
7

8  
9 **Authors:**

10  
11 Laura Dean<sup>1a</sup>

12  
13 Stefanie Gregorius<sup>1</sup>

14  
15 Imelda Bates<sup>1</sup>

16  
17 Justin Pulford<sup>1</sup>

18  
19  
20  
21  
22 1. Department of International Public Health, Capacity Research Unit, Liverpool School of Tropical  
23  
24 Medicine, Pembroke Place, Liverpool, L3 5QA, UK.  
25  
26

27  
28  
29 <sup>a</sup> Corresponding Author: [laura.dean@lstm.ac.uk](mailto:laura.dean@lstm.ac.uk) Tel: 01517053793  
30  
31

32  
33 Key Words: LMIC, Capacity Strengthening, Scoping Review  
34

35  
36 Word Count: 5721  
37  
38  
39  
40  
41  
42  
43  
44  
45  
46  
47  
48  
49  
50  
51  
52  
53  
54  
55  
56  
57  
58  
59  
60

## Abstract

**Objectives:** Substantial development assistance and research funding are invested in health research capacity strengthening (HRCS) interventions in low- and middle-income countries, yet the effectiveness, impact and value for money of these investments are not well understood. A major constraint to evidence-informed HRCS intervention has been the disparate nature of the research effort to date. This review aims to map and critically analyse the existing HRCS effort to better understand the level, type, cohesion and conceptual sophistication of the current evidence base. The overall goal of this paper is to advance the development of a unified, implementation-focused HRCS science.

**Methods:** We utilised a scoping review methodology to identify peer-reviewed HRCS literature within the following databases: PubMed, Global Health, and Scopus. HRCS publications available in English between the period 2000-2016 were included. 1195 articles were retrieved of which 172 met the final inclusion criteria. A-priori thematic analysis of all included articles was completed. Content analysis of identified HRCS definitions was conducted.

**Results:** The number of HRCS publications increased exponentially between 2000 and 2016. Most publications during this period were perspective, opinion or commentary pieces; however, original research publications were the primary publication type since 2013. Twenty-five different definitions of research capacity strengthening were identified, of which three aligned with current HRCS guidelines.

**Conclusions:** The review findings indicate a HRCS research field with a focus on implementation science is emerging, although the conceptual and empirical bases are not yet sufficiently advanced to effectively inform HRCS programme planning. Consolidating a HRCS implementation science therefore presents as a viable option that may accelerate the development of a useful evidence-base to inform HRCS programme planning. Identifying an agreed operational definition of HRCS,

1  
2  
3 standardising HRCS-related terminology, developing a needs-based HRCS-specific research agenda  
4  
5 and synthesising currently available evidence may be useful first steps.  
6  
7  
8

### 9 **Strengths and Limitations of the Study**

- 11 • This scoping review brings together various studies and reviews focused on HRCS to provide  
12 the impetus and direction for a dedicated HRCS implementation science to emerge and to  
13 foster a common identity for HRCS researchers.  
14
- 15 • This review critically analysed current definitions of HRCS to contribute toward the  
16 identification of a consolidated, evidence based, operational definition of HRCS on which  
17 future HRCS interventions and evaluations can be based.  
18
- 19 • Some articles published in non-Anglophone journals, in non-health related journals, or in a  
20 lexicon outside of the key word terms employed herein would not have been retrieved by  
21 the search methodology.  
22
- 23 • Relevant work that remains unpublished, published outside of academic peer-reviewed  
24 journals or published prior to 2000 would also have been omitted.  
25
- 26 • The review did not critically examine the quality of the research effort (in original research  
27 publications) or analyse the output (findings) of the collective research effort.  
28  
29  
30  
31  
32  
33  
34  
35  
36  
37  
38  
39  
40  
41  
42  
43  
44  
45  
46  
47  
48  
49  
50  
51  
52  
53  
54  
55  
56  
57  
58  
59  
60

## Introduction

Health research capacity in many low- and middle-income countries (LMICs) is poor<sup>1-4</sup>, undermining LMIC ability to identify and respond to local health needs or to equitably participate in the international response to global health challenges. Numerous health research capacity strengthening (HRCS) interventions have been employed in LMICs ranging from simple training programmes to currently advocated 'systems' approaches that focus on developing the capacity of individual researchers, research institutions and the wider research environment<sup>5-7</sup>. The international research community has a dual role in LMIC HRCS. The first role is that of a HRCS *implementer* and centres on the transfer of expertise in specialist subject areas pertinent to LMIC health research priorities, typically from higher- to lower-capacitated individuals or organisations and may be facilitated through such mechanisms as scholarship schemes, technical assistance, research networks or research consortia. The second role is that of an HRCS *scientist* and centres on the creation of robust theory and evidence to inform optimal HRCS interventions. Here, the researcher is not an expert in the subject matter of a specific HRCS intervention (e.g. increasing capacity in operational research to support national malaria control programmes), but is concerned with providing the evidence-base to inform HRCS funders and implementing partners how their respective programme goals may best be achieved (e.g. what investments would produce the greatest, most sustainable gain in operational research capacity to support a national malaria control programme).

The extent to which the research community is fulfilling this latter role (i.e. HRCS scientist), as compared to the former role (i.e. HRCS implementer), is questionable at present. A recent paper described the existing HRCS evidence-base as 'confusing, controversial and poorly defined'<sup>8</sup> despite a long recognised need to support HRCS in LMICs<sup>9</sup>. Fundamental questions remain largely unanswered such as; how to reliably assess existing capacities at different levels of a health research

1  
2  
3 system; which interventions facilitate sustainable capacity gains in which circumstances; and which  
4  
5 capacity term (building, strengthening or development) is the most nuanced and appropriate to  
6  
7 reflect developmental discourse and baseline capacities<sup>10</sup>. The international research community is  
8  
9 therefore in the awkward position of being a highly active participant in the transfer of scientific  
10  
11 theory and method within the context of subject-specific HRCS interventions, yet largely inactive in  
12  
13 rigorously applying scientific theory and method to the HRCS process.  
14  
15

16  
17  
18 The paucity of evidence available to inform HRCS implementation reflects, in part, the difficulties in  
19  
20 measuring an inherently multi-faceted, long-term, continuous process (i.e. HRCS) subject to a  
21  
22 diverse range of influences and assumptions. A greater constraint has been the sparse and disparate  
23  
24 nature of the HRCS-related research effort to date. HRCS-related research has involved multiple  
25  
26 academic disciplines, employing diverse frameworks, concepts, methods and terminologies, working  
27  
28 in isolation and publishing in different fields (e.g. medical education, communication, operational  
29  
30 research and evaluation). A dedicated, multi-disciplinary, implementation-focused research  
31  
32 approach is undoubtedly required to improve the effectiveness, impact and value for money of  
33  
34 current and future HRCS implementation activities in LMICs. However, there is little evidence of a  
35  
36 unified HRCS implementation science emerging to date.  
37  
38  
39

40  
41  
42 The overall goal of this paper is to advance the development of a unified, implementation-focused  
43  
44 HRCS science. To achieve this goal, a scoping review of HRCS-related publications for the period  
45  
46 2000-2016 was conducted and operational definitions of HRCS within this literature critically  
47  
48 examined. The review findings are not presented as a definitive account of HRCS activity across this  
49  
50 period as relevant material may be unpublished, may be found in the grey literature or may be  
51  
52 published in a lexicon outside of the search terms employed herein. The review is better understood  
53  
54 as an attempt to critically analyse the collective HRCS effort regarding the level, type, cohesion and  
55  
56 conceptual sophistication of the current evidence base. The review may be considered an initial  
57  
58  
59  
60

1  
2  
3 attempt to map the HRCS research effort, providing the impetus and direction for a dedicated HRCS  
4  
5 implementation science to emerge and fostering a common identity for HRCS researchers.  
6  
7  
8

## 9 10 **Methods**

11  
12  
13  
14  
15 This review was conducted according to stages 1-5 of the advanced 'scoping' methodology proposed  
16  
17 by Levac et al <sup>11</sup>, based on the original framework of Arksey and O'Malley <sup>12</sup>. A scoping review was  
18  
19 considered appropriate given the primary focus was on examining the extent, range and nature of  
20  
21 an emerging peer-reviewed literature. The critical examination of operational definitions of HRCS  
22  
23 falls outside of the 'scoping review' approach, yet is included as a means of 'revealing' (in part) the  
24  
25 conceptual sophistication and cohesion of the reviewed literature.  
26  
27  
28  
29

## 30 31 **Identification of Data Sources**

32  
33  
34  
35  
36 The first two steps of the scoping review method include identifying a research question and  
37  
38 relevant studies. To explore the breadth, concepts, definitions and methods currently prioritised in  
39  
40 the HRCSpeer-reviewed literature, we searched for empirical and theoretical publications within the  
41  
42 following databases: PubMed, Global Health, and Scopus. Search terms used were: ("capacity  
43  
44 strengthening", OR "capacity development", OR "capacity building") combined with ("global health"  
45  
46 OR, "international health" OR, "global public health", OR "health research" OR, "health  
47  
48 development"). Additional search criteria included: papers published between 01/01/2000 and  
49  
50 31/12/2016 and both abstract and full paper available in English. Searches began from the year 2000  
51  
52 as a reflection of the stepwise change in the profile and investment in HRCS. Results were stored  
53  
54 within an EndNote library.  
55  
56  
57  
58  
59  
60



## Selection of Data Sources

Study selection (step 3) was an iterative process in which selected abstracts and full texts were initially reviewed to identify and agree upon inclusion criteria, which were then subsequently 'tested' and refined through further review. All article titles, abstracts and key words were reviewed against the final inclusion criteria (Figure 1). Publications that met these criteria following abstract review were then subjected to a more intensive full text review. Publications in which a conclusive inclusion/exclusion decision could not be made on the basis of abstract review were also included for full text review. SG and JP independently screened publications included for full text review with LD providing a third review to determine inclusion/exclusion status in cases of disagreement.

**Figure 1. Summary of search and selection process**

## Data Charting and Analysis

The variables extracted from each publication included in the final review were determined by an iterative 'data charting' process (step 4) SG & JP independently reviewed a selection of publications and identified potential variables to extract. Target variables were then agreed by consensus opinion. Target variables included publication 'typologies' (Box 1) and the wide range of programme-, author- and research-type data listed in Tables 1, 2 and S1-S7. Research quality was not formally assessed; however, some aspects such as study design, methods and analysis were considered where appropriate., Data extraction was conducted independently by at least two reviewers, with the third providing a deciding opinion in cases of disagreement. Following data extraction, each member of the review team was assigned a sub-set of publications for subsequent summary analysis (step 5). Final analysis and reporting of all data were agreed by mutual consent.

**Box 1. HRCS Publication Typologies**

**Original Research:** Publications in which a) a hypothesis, research question or study purpose was stated; b) research methods described; c) results reported; and d) the results and their possible implications discussed.

**Perspectives, Opinion or Commentary:** Publications expressing the authors' viewpoint on some aspect of HRCS based on anecdotal evidence, personal experience and/or (in a very few cases) original data that were not presented in an 'original research' format (i.e. did not include a formal description of the research aims, methods, results and discussion).

**Systematic Review:** Publications in which a) research objectives/questions were clearly stated; b) explicit and systematic methods were used; c) methods were limited to the systematic identification and analysis of some form of literature; and d) results were reported and discussed. Non-systematic reviews were included within the original research section.

During in-depth analysis of each publication any operational definition of (health) research capacity strengthening was extracted and analysed for content. To identify commonalities, definition content was independently coded by JP and SG per the a-priori content criteria identified in Table 3. Coding disagreements were resolved by the same process described above. A content score, defined as the number of domains (out of 10) present, was calculated for each definition to identify the most inclusive working definition of HRCS within the current evidence base.

## Results

1  
2  
3 1195 papers were retrieved via the search methodology of which 172 (see S8 Table) met the final  
4  
5 inclusion criteria. The number of HRCS publications identified increased over time, from 0 in the year  
6  
7 2000 to a maximum of 32 in 2016 (Fig 2).  
8  
9

10  
11  
12 **Fig 2.** Number of publications per year by publication type.

## 13 14 15 **HRCS Publication Typologies**

16  
17  
18  
19  
20 Overall, 51% of publications presented a perspective, opinion or commentary, 46% original research  
21  
22 and 3% findings from a systematic review (Table 1). The first and/or last author was from an institute  
23  
24 located in an LMIC in 58% of publications, 'capacity building' was the favoured term in 59% and 19%  
25  
26 presented an operational definition of HRCS.  
27  
28  
29

30  
31 **Table 1. Selected characteristics of reviewed publications**

| Publication Type       | No.        | LMIC Authorship <sup>1</sup> |           |            | Capacity Term <sup>2</sup> |           |           |          | Defined HRCS <sup>3</sup> |
|------------------------|------------|------------------------------|-----------|------------|----------------------------|-----------|-----------|----------|---------------------------|
|                        |            | First                        | Last      | Either     | CB                         | CD        | CS        | Oth.     |                           |
| Original Research      | 79         | 31                           | 32        | 41         | 38                         | 18        | 24        | 0        | 17                        |
| Pers. Opin. Commentary | 88         | 36                           | 42        | 56         | 63                         | 6         | 19        | 0        | 16                        |
| Systematic Review      | 5          | 3                            | 1         | 3          | 1                          | 1         | 2         | 0        | 0                         |
| <b>Total</b>           | <b>172</b> | <b>70</b>                    | <b>75</b> | <b>100</b> | <b>102</b>                 | <b>25</b> | <b>45</b> | <b>0</b> | <b>33</b>                 |

32  
33  
34  
35  
36  
37  
38  
39  
40  
41  
42  
43  
44  
45  
46  
47  
48 1 Based on location of listed organisational affiliation of first and last authors; 'either' = either first or last. 2

49 capacity term used in title and then keywords given priority. (CB=capacity building, CD=capacity development,

50  
51 CS=capacity strengthening, Oth.=other). 3 Number of papers that provided an operational definition of HRCS.  
52  
53  
54  
55  
56  
57  
58  
59  
60

1  
2  
3 1  
4  
5 2  
6 **Original Research**  
7 3  
8  
9  
10 4  
11  
12 5  
13  
14 6  
15  
16 7  
17  
18 8  
19  
20 9  
21  
22 10  
23  
24 11  
25  
26 12  
27  
28 13  
29  
30 14  
31  
32 15  
33  
34 16  
35  
36 17  
37  
38 18  
39  
40 19  
41  
42 20  
43  
44 21  
45  
46 22  
47  
48 23  
49  
50 24  
51  
52 25  
53  
54  
55  
56  
57  
58  
59  
60

## Original Research

The 79 publications that met 'original research' criteria were sub-categorised into research typologies including: learning and evaluation (from research initiatives), capacity assessment, HRCS methods for implementation, evidence synthesis for HRCS implementation and evaluation, and miscellaneous. Table 2 presents selected methodological characteristics of the original research publications both overall and by sub-category. Additional data, not all of which are described below, are included in S1-S7 Tables.

1  
2  
3  
4  
5  
6  
7  
8  
9  
10  
11  
12  
13  
14  
15  
16  
17  
18  
19  
20  
21  
22  
23  
24  
25  
26  
27  
28  
29  
30  
31  
32  
33  
34  
35  
36  
37  
38  
39  
40  
41  
42  
43  
44  
45  
46  
47  
48  
49

26 **Table 2. Selected methodological characteristics of original research publications**

| Sub-Category          | No.       | Setting <sup>1</sup> |          |          |          |          |          |           | Design <sup>2</sup> |           |           |           | Data Collection <sup>3,4</sup> |           |           |           | Data Analysis <sup>4,5</sup> |           |          |
|-----------------------|-----------|----------------------|----------|----------|----------|----------|----------|-----------|---------------------|-----------|-----------|-----------|--------------------------------|-----------|-----------|-----------|------------------------------|-----------|----------|
|                       |           | Af                   | Am       | Se       | Eu       | Em       | Wp       | Gl        | Quan                | Qual      | Mix       | Sur       | IDI                            | FGD       | Rev       | Oth       | The                          | Des       | Inf      |
| Learning & Evaluation | 36        | 14                   | 1        | 4        | 0        | 1        | 4        | 14        | 8                   | 9         | 19        | 20        | 18                             | 5         | 16        | 10        | 28                           | 18        | 1        |
| Capacity Assessment   | 27        | 16                   | 0        | 0        | 1        | 2        | 3        | 5         | 6                   | 7         | 14        | 15        | 13                             | 5         | 15        | 7         | 19                           | 22        | 0        |
| HRCS Methods          | 7         | 6                    | 0        | 0        | 0        | 0        | 0        | 1         | 1                   | 5         | 1         | 2         | 1                              | 1         | 4         | 4         | 6                            | 1         | 1        |
| Evidence Synthesis    | 5         | 0                    | 0        | 0        | 0        | 0        | 0        | 5         | 0                   | 4         | 1         | 1         | 0                              | 0         | 5         | 4         | 5                            | 0         | 0        |
| Miscellaneous         | 4         | 2                    | 0        | 0        | 0        | 0        | 0        | 2         | 0                   | 2         | 2         | 2         | 3                              | 0         | 2         | 1         | 4                            | 0         | 0        |
| <b>Total</b>          | <b>79</b> | <b>38</b>            | <b>1</b> | <b>4</b> | <b>1</b> | <b>3</b> | <b>7</b> | <b>27</b> | <b>15</b>           | <b>27</b> | <b>37</b> | <b>40</b> | <b>35</b>                      | <b>11</b> | <b>42</b> | <b>26</b> | <b>62</b>                    | <b>41</b> | <b>2</b> |

27 1. WHO region where the study was located: African (Af), Americas (Am), South-East Asia (Se), European (Eu), Eastern Mediterranean (Em), Western Pacific (Wp) or Global  
 28 (Gl)(defined as 3 or more WHO regions). 2. Quantitative (Quan.), qualitative (Qual.) or mixed methods (Mix.). 3. Survey (Sur.), in-depth interview (IDI), focus group  
 29 discussion (FGD), literature/document review (Rev.) or other methodology (Other). 4. Categories are not mutually exclusive. 5. Thematic (Them.), descriptive (Desc.) or  
 30 inferential (Infer.).

## 35 Learning & evaluation

36 This category included 36 publications that presented findings from a formal evaluation of an HRCS  
37 initiative or described 'learnings' obtained from HRCS implementation (Table 2 and S1 Table). Sixty-  
38 four percent were 'education' based HRCS programmes in which some form of training (inclusive of  
39 postgraduate awards) was provided to strengthen individual capacity and, in some cases, was  
40 inclusive of the development and transfer of a course curriculum at an institutional level e.g. <sup>13</sup>.  
41 Other HRCS programme types included collaborative research (n=12), time-limited work placement  
42 (n=2), strengthening the broader health research system (n=2), infrastructure development (n=1) or  
43 strengthening financial management (n=1). The respective HRCS programmes involved North-South  
44 collaboration in 83% of cases. Seventy-five percent of programmes sought to strengthen research  
45 capacity in a specific subject area, most commonly health systems (n=6).

### 47 Box 2. Learning and Evaluation Typologies

48 **Lessons Learned:** publications focused on broad, programme(s)-level experiences in setting up  
49 and/or participating in an HRCS initiative and/or providing a largely qualitative account of  
50 programme achievements.

51 **Programme Outputs:** publications focused on HRCS programme outputs, where outputs were  
52 defined as a quantification of activities that occurred during the programme and/or related  
53 professional activities that occurred after the programme (e.g. no. of publications).

54 **Programme Outcomes:** publications that focused on improvements in individual-, institutional- or  
55 environmental-level health research capacity following an HRCS initiative and employed quantitative  
56 measures designed to attribute improved performance to the respective HRCS intervention.

57  
58 The objective of each 'learning and/or evaluation' publication was coded per the typologies  
59 presented in Box 2. Overall, 67% of the learning and evaluation publications were given a single code  
60 and 33% were given 2 or more codes. 'Lessons learned' was allocated to 44% of publications,

1  
2  
3 61 'programme outputs' to 33%, 'programme outcomes' to 28% and unique codes were allocated to  
4  
5 62 33%. Quantitative outcome indicators varied among publications that employed them, although  
6  
7 63 were generally: variants of some form of citation analysis to measure influence of research  
8  
9 64 publication (that followed the HRCS intervention) on health policy <sup>14-16</sup>; measures of knowledge  
10  
11 65 change pre- and post-HRCS intervention or knowledge gained from an intervention <sup>17-20</sup>; some form  
12  
13  
14 66 of 'attributional' measure designed to assess the relationship between capacity improvement and  
15  
16 67 the respective HRCS intervention <sup>17 18 21 22</sup>.

17  
18  
19  
20 69 Sixty-four percent of studies were retrospective, 64% were a type of (quasi-) formative evaluation,  
21  
22 70 53% were mixed methods and 17% were authored by individuals independent of the organisation  
23  
24 71 implementing the respective HRCS initiative (study design data not presented in Table 2 are shown  
25  
26 72 in S1 Table). Sampling was primarily purposive (n=20).

27  
28  
29  
30  
31  
32  
33

### 74 **Capacity Assessment**

34 75 This category included 27 original research publications that presented the outcome of some form of  
35  
36 76 health research capacity assessment (Table 2 and S2 Table). Capacity assessment focus varied; the  
37  
38 77 largest proportion (9/27) focused on assessing capacity to carry out research, often in a specific  
39  
40 78 subject area (18/27), most commonly health policy and systems research (6/27).

41  
42  
43 79 Capacity assessments were conducted within the context of a research institution(s), including  
44  
45 80 universities or research network in 59% of publications. Eleven percent focussed on the capacities of  
46  
47 81 ethics committees and one involved health care providers. The remaining 26% focused on national  
48  
49 82 and/or regional capacity in specific research and/or geographical areas through reviewing literature  
50  
51 83 and publication trends.

52  
53  
54  
55 84 Thirty-seven percent (10/27) of capacity assessments were conducted as part of a consortium based  
56  
57 85 research programme, consisting of European and African partners.

## 86 HRCS methods for implementation

87 This category includes 7 articles that present a methodological approach to HRCS or evaluation of  
88 HRCS (S3 Table). Two articles focus on HRCS within the frame of North-South partnerships and 4  
89 prioritised general HRCS, often embedded in a specific subject area e.g. policy analysis. The  
90 remaining article focused on the development and validation of a questionnaire for evaluation of  
91 HRCS training activities.

92  
93 The numbers of steps in methodological approach varied; however, consistent phasing or process  
94 can be identified. In all publications, the purpose of the HRCS activity was initially established  
95 although this was only stated as an explicit methodological step in one paper<sup>23</sup>. Three articles then  
96 developed bespoke 'optimal health research' criteria or 'ideal partnership capacity' criteria through  
97 a combination of literature searches and interactions with key stakeholders. The remaining 4  
98 publications adapted an existing tool or framework that could be used as a common ideal for health  
99 research or partnership capacity. Once developed, 3 papers described these measures as  
100 'standardised'. The remaining 4 papers described these measures as 'semi-standardised' to allow for  
101 flexibility in context. Two papers described this flexibility in approach as linked to theory of change  
102 or quality assurance (QA) cycle methodology.

103  
104 Papers then presented the methods used to conduct the capacity assessment. One described a fixed  
105 point of quantitative measurement, and six described a phased or developmental approach to  
106 identification of both health research capacity strengths and weaknesses, anticipating that as HRCS  
107 methods were implemented, weaknesses may be identified and certain areas strengthened. One  
108 partnership focused paper described this developmental approach to ensure equity within  
109 partnership development. Two papers described assessments that were solely 'self-assessments'  
110 (i.e. relied solely on internal institution staff). Four papers described assessments that involved  
111 collaborative assessments between partners inside (usually LMIC) and outside (usually high income



1  
2  
3 112 country (HIC) the institution. Four of the papers that took a developmental approach described the  
4  
5 113 end of this process as the collaborative development of continuously evolving capacity  
6  
7 114 strengthening plans which HRCS activities should be implemented against.  
8

9  
10 115

## 11 116 **Evidence synthesis for HRCS implementation and evaluation**

12  
13  
14 117 This category included 5 articles that focused on the synthesis of evidence to enhance learning for  
15  
16 118 the implementation or evaluation of HRCS programmes (S4 Table). Four articles concentrated on  
17  
18 119 understanding multi-programme experience to harmonise learning for HRCS evaluation. All 4 of  
19  
20 120 these articles focus on the experience of funders of HRCS activities, with 3 extending their  
21  
22 121 exploration to the views of HRCS experts, evaluators and/or implementers. The fifth article focused  
23  
24 122 on understanding multi-programme experience to aid in more effective HRCS programme design  
25  
26 123 and implementation for nurses. All articles had a global focus, with four prioritising LMICs.  
27  
28

29  
30 124

31 125 The nuanced nature of each article in this category made identification of core typologies  
32  
33 126 challenging. The 4 articles focused on evidence harmonisation for HRCS<sup>24-27</sup>, argued that evaluations  
34  
35 127 should be underpinned by theory, using logic or theory of change models. However, 3 articles  
36  
37 128 reflected that these models are rarely employed in practice due to time constraints on the  
38  
39 129 evaluation process<sup>24 25 27</sup>. Furthermore, where potential frameworks for evaluation do exist, 2  
40  
41 130 articles described these as being driven by the goal of the funder with limited stakeholder  
42  
43 131 engagement<sup>26 27</sup>. Two articles linked lack of stakeholder engagement in evaluation design to issues  
44  
45 132 of equity<sup>24 26</sup>, arguing that for HRCS activities to be equitable, members of the most marginalised  
46  
47 133 populations should be involved in evaluation design and indicators should reflect equity issues.  
48

49  
50  
51 134

## 52 135 **Miscellaneous**

1  
2  
3 136 Four original research articles could not be assigned to any sub-category (Table 2 and S5 Table). The  
4  
5 137 first publication was a qualitative cross sectional study that investigated the challenges and benefits  
6  
7 138 of research capacity strengthening through North-South research partnerships from a Ugandan  
8  
9 139 perspective. The second publication was a qualitative case study of health research commissioning  
10  
11 140 among different organisations in East Africa. The third, investigated researchers' (involved in  
12  
13 141 collaborative networks across LMICs) experiences regarding science and ethics in global health  
14  
15 142 research collaborations. The fourth publication discussed different experiences of mentoring health  
16  
17 143 researchers across HICs and LMICs, as effective mentorship of researchers is crucial for research  
18  
19 144 capacity strengthening.  
20  
21  
22  
23  
24

## 146 **Perspectives, Opinion or Commentary**

25  
26  
27 147  
28  
29 148 The 88 'perspective' publications were coded based on the primary subject matter. Codes included  
30  
31 149 the three previously described in Box 2 and the additional codes 'programme description' and  
32  
33 150 'recommendations'. Publications were coded 'programme description' if they presented a  
34  
35 151 description of a specific HRCS programme or activity. Publications were coded 'recommendations' if  
36  
37 152 a primary purpose of the publication was to describe steps, processes, approaches and/or activities  
38  
39 153 that, per the authors' views and experiences, would enhance capacity strengthening initiatives.  
40  
41 154 There is significant overlap between the categories 'lessons learned' and 'recommendations'. The  
42  
43 155 key point of difference is that the lessons or recommendations presented in publications coded  
44  
45 156 'recommendations' are largely based on broad experience or reading of the literature rather than  
46  
47 157 reference to a specific HRCS programme or programme type (in which case they would be coded  
48  
49 158 'lessons learned').  
50  
51  
52  
53  
54

55  
56 160 Overall, 73% of the perspective, opinion or commentary publications were given a single 'focus' code  
57  
58 161 and 27% were given 2 or more codes. 'Lessons learned' was allocated to 49% of publications,  
59  
60

1  
2  
3 162 'programme description' to 26%, 'recommendations' to 25%, 'programme outputs' to 19%,  
4  
5 163 'programme outcomes' to 2% and unique codes were allocated to 8%. The quantitative outcome  
6  
7 164 indicators included a measure of knowledge change pre- and post-HRCS intervention <sup>28</sup> and an  
8  
9 165 'attributional' measure designed to assess the relationship between capacity improvement and the  
10  
11 166 respective HRCS intervention <sup>29</sup>.

12  
13  
14 167  
15  
16 168 The content of the various perspective, opinion or commentary publications was derived from HRCS  
17  
18 169 experience in 76% of publications, although in the majority commentary pertained to experience  
19  
20 170 from a single HRCS programme (59/67). Content was also drawn from reviews of HRCS-related  
21  
22 171 literature or documentation (12/88), HRCS-related workshops (5/88) and in 8 cases the basis of the  
23  
24 172 commentary was not stated. The HRCS programme or activity types varied widely, ranging from a  
25  
26 173 broad emphasis on HRCS in LMICs to specific aspects of HRCS in specified countries.

27  
28  
29 174

## 30 31 175 **Systematic Review**

32  
33  
34  
35 176 Five publications fitted this category (S7 Table). Two publications reviewed tools and approaches to  
36  
37 177 assess capacity needs and monitor and evaluate capacity strengthening activities <sup>30 31</sup>. Three  
38  
39 178 publications did not focus on specific HRCS activities, but used bibliometric and scientometric  
40  
41 179 techniques to investigate health research capacity in specific subject areas focussing on publication  
42  
43 180 trends, author affiliations, geographical areas of the study, study design and thematic focus <sup>32-34</sup>.

44  
45  
46  
47 181 Two publications searched a single database, 2 searched 2 and 1 searched 3. Four publications  
48  
49 182 searched PubMed as the main database. Four publications followed a single systematic search  
50  
51 183 strategy, whereas 1 employed a systematic search and snowball-sampling to identify publications  
52  
53 184 after considering inclusion and exclusion criteria. The number of papers included in each review  
54  
55 185 varied from 14–690.

1  
2  
3 186  
4  
5 187  
6  
7  
8 188  
9  
10  
11  
12  
13  
14  
15  
16  
17  
18  
19  
20  
21  
22  
23  
24  
25  
26  
27  
28  
29  
30  
31  
32  
33  
34  
35  
36  
37  
38  
39  
40  
41  
42  
43  
44  
45  
46  
47  
48  
49  
50  
51  
52  
53  
54  
55  
56  
57  
58  
59  
60

## 188 HRCS Definitions

189 Nineteen percent (33/172) of publications presented an operational definition of 'capacity' (S9  
190 Table). The definition specifically pertained to 'health research capacity' in 7 publications; in the  
191 remaining publications' broader definitions of 'research capacity' (n=10), 'capacity' (n=6) or  
192 'organisational capacity' (n=1) were presented and in 2 publications capacity was operationally  
193 defined as 'progress'. Twenty-five separate definitions were presented of which 9 were original  
194 (Table 3). Seven of the 25 definitions were cited by 2 (n=4), 3 (n=2) or 4 (n=1) publications. In all  
195 other cases the definition was presented in a single publication. Three publications presented 2  
196 definitions.

197  
198 Thirty-six percent of the definitions included explicit reference to all 3 levels of capacity  
199 strengthening, 12% included explicit reference to all 3 aspects of the research process (defining  
200 research questions, conducting research and communicating/applying research outcomes) and 28%  
201 included explicit reference to at least 2 of the 4 'other' content domains assessed, the most common  
202 of which included reference to HRCS as improving research quality or ability (n=11) or HRCS as a  
203 process (n=9) (Table 3). Out of the 10 content domains assessed, the median number present across  
204 all definitions was 4 (range 2-9). Variation in median 'content' score was evident across the  
205 definition types: the median score for 'health research capacity' definitions was 3 (range 2-6), 5  
206 (range 2-9) for 'research capacity' definitions, 4 (range 3-5) for 'capacity' definitions and 2 (range 2)  
207 for the 'organisational capacity' and 'progress' definitions.

1  
2  
3  
4  
5  
6  
7  
8  
9  
10  
11  
12  
13  
14  
15  
16  
17  
18  
19  
20  
21  
22  
23  
24  
25  
26  
27  
28  
29  
30  
31  
32  
33  
34  
35  
36  
37  
38  
39  
40  
41  
42  
43  
44  
45  
46  
47  
48  
49

212 Table 3. Content analysis of ‘capacity’ definitions<sup>1</sup>

| Subject Defined          | Capacity Term                                | Content Domains <sup>2</sup> |      |      |      |      |      |     |      |      |     |
|--------------------------|----------------------------------------------|------------------------------|------|------|------|------|------|-----|------|------|-----|
|                          |                                              | Ind.                         | Ins. | Env. | Def. | Car. | App. | Qua | Sus. | Pro. | Con |
| Health Research Capacity | Building [30], Strengthening [70]            | x                            | x    | x    |      | x    | x    |     | x    |      |     |
|                          | Building [166], Strengthening [74, 126]      |                              | x    |      | x    | x    |      |     |      | x    |     |
|                          | Strengthening [123]                          |                              |      | x    |      |      |      | x   |      |      |     |
|                          | Development [45]                             |                              | x    |      |      |      |      | x   |      | x    |     |
|                          | Strengthening [48]                           |                              |      |      |      | x    | x    |     |      |      |     |
|                          | Building [139]                               | x                            | x    |      |      |      |      | x   |      | x    |     |
|                          | Building [97]                                | x                            | x    |      |      |      |      | x   |      |      |     |
| Research Capacity        | Building [164], Strengthening [29, 123, 159] | x                            | x    | x    | x    | x    | x    |     |      | x    | x   |
|                          | Strengthening [16, 72]                       | x                            | x    |      |      | x    |      | x   |      | x    |     |
|                          | Development [4], Strengthening [31, 74]      | x                            | x    | x    | x    | x    | x    | x   | x    | x    |     |
|                          | Building [132]                               |                              |      |      |      | x    | x    |     |      |      |     |
|                          | Building [91, 96]                            | x                            | x    |      |      | x    | x    | x   |      |      |     |
|                          | Building [130]                               | x                            | x    | x    |      |      |      |     |      | x    | x   |
|                          | Strengthening [165]                          | x                            | x    |      |      | x    |      | x   |      |      |     |

|                         |                                  |   |   |   |   |   |   |   |
|-------------------------|----------------------------------|---|---|---|---|---|---|---|
|                         | Building [46]                    | x | x | x | x | x | x | x |
|                         | Strengthening [79]               | x | x | x |   |   |   |   |
|                         | Building [166]                   | x |   |   |   | x |   | x |
| Capacity                | Building [25]                    | x | x | x |   |   |   | x |
|                         | Building [133]                   |   | x | x |   |   | x | x |
|                         | Strengthening [66]               | x | x | x |   |   |   | x |
|                         | Strengthening [65]               | x | x | x |   |   | x | x |
|                         | Building [150]                   |   | x | x |   |   |   | x |
|                         | Strengthening [47]               | x |   |   |   | x |   | x |
| Organisational Capacity | Development [27]                 |   | x |   |   |   |   | x |
| Progress                | Building [142], Development[143] |   |   |   |   | x | x |   |

213 1. Numbered citations pertain to the reference list in S8 Table. 2. The content of each definition was independently coded according to the following criteria: explicit  
 214 reference to individual (ind.), institutional (Ins.) or environmental (Env.) level capacity strengthening; explicit reference to strengthening capacity in terms of defining  
 215 research questions or identifying research priorities (Def.), conducting research or applying research methods (Car.) or communicating and applying research outcomes  
 216 (App.); explicit reference to facilitating an improvement in research abilities/quality (Qua.) sustainability (Sus.), reference to HRCS as a process (Pro.) and/or HRCS as a  
 217 continuous activity (Con.).

218

219

20

1  
2  
3 220 Variation between a capacity definition and favoured capacity 'term' (i.e. building, strengthening or  
4  
5 221 development) was evident where a definition had been cited by more than 1 paper. For example,  
6  
7 222 "an ability of individuals, organisations or systems to perform and utilise health research effectively,  
8  
9 223 efficiently and sustainably"<sup>35</sup> was variously presented as a definition of health research capacity  
10  
11 224 'strengthening'<sup>35</sup> and health research capacity 'building'<sup>16</sup>.

12  
13  
14 225

15  
16 226 An additional content analysis was conducted to examine the possible relationship between  
17  
18 227 favoured capacity term and choice of capacity definition (S10 Table). Of the definitions used in the  
19  
20 228 14 publications that favoured the term 'capacity building', the median content score was 4 (range 2-  
21  
22 229 8), 36% (5/14) included a specific reference to all 3 levels of capacity strengthening, 14% (2/14)  
23  
24 230 included explicit reference to all 3 aspects of the research process and 21% (3/14) included explicit  
25  
26 231 reference to at least 2 of the 4 'other' content domains assessed. Comparative results for the 12  
27  
28 232 publications that favoured the term 'capacity strengthening' were: 4 (2-9), 50% (6/12), 17% (2/12)  
29  
30 233 and 33% (4/12) and 2.5 (range 2-9), 25% (1/4), 25% (1/4), 25% (1/4) for the 4 publications that  
31  
32 234 favoured the term 'capacity development'.

33  
34  
35 235

## 36 37 38 236 **Discussion**

39  
40  
41  
42 237

43  
44 238 The purpose of this scoping review was to map the current HRCS research effort since the year 2000  
45  
46 239 and to critically examine how HRCS has been defined within the peer-reviewed literature. With  
47  
48 240 regards to the level and type of HRCS-related publication, the study revealed that the number of  
49  
50 241 HRCS publications has increased exponentially between 2000 and 2016. Most publications during  
51  
52 242 this period have been perspective, opinion or commentary pieces. Publications presenting original  
53  
54 243 research findings also increased over this period and have been the primary publication type since  
55  
56 244 2013, indicating an emerging field of predominantly implementation-focused HRCS science. Almost

1  
2  
3 245 half of the original research papers pertained to the African region as did a large proportion of  
4  
5 246 commentary papers (S6 Table). An Afrocentric evidence base may reflect current HRCS funding  
6  
7 247 priorities<sup>36</sup> and need; however, such Afrocentrism renders it difficult to generalise the collective  
8  
9 248 findings to LMIC settings in other geographical regions.  
10

11 249

12  
13 250 The findings and recommendations presented in this paper should be considered alongside  
14  
15 251 limitations in the review methodology. HRCS research, reviews and commentaries published in non-  
16  
17 252 Anglophone journals, in non-health related journals or in a lexicon outside of the key word terms  
18  
19 253 employed herein would not have been retrieved by the search methodology. Relevant work that  
20  
21 254 remains unpublished, published outside of academic peer-reviewed journals or published prior to  
22  
23 255 2000 would also have been omitted. Thus, the reported findings should not be considered a  
24  
25 256 comprehensive representation of the existing literature pertaining to HRCS in LMICs. The analysis of  
26  
27 257 retrieved publications was limited to identifying the typologies within, and key characteristics of, the  
28  
29 258 collective peer-reviewed literature as well as the frequency and type of operational HRCS definitions.  
30  
31 259 The review did not critically examine the quality of the research effort (in original research  
32  
33 260 publications) or analyse the output (findings) of the collective research effort. These tasks were  
34  
35 261 outside the scope of this review, but warrant future attention to inform a fuller assessment of the  
36  
37 262 'value' of published HRCS research. All authors on this publication have considerable experience  
38  
39 263 working in and/or with health research institutions in LMICs. However, all authors originate from,  
40  
41 264 were educated in and are currently based in a high-income country context. Interpretation of the  
42  
43 265 reported findings may reflect this reality.  
44  
45  
46  
47  
48

49 266

50  
51 267 Our findings suggest conceptual representations of HRCS within the published literature are  
52  
53 268 inconsistent and infrequently applied. Capacity was rarely defined across the publications and the  
54  
55 269 definitions that were presented varied widely in content and scope. Broader definitions of 'research  
56  
57 270 capacity' or 'capacity', rather than specific 'health research capacity' definitions, were most  
58  
59



1  
2  
3 271 commonly employed and no 'one' specific definition of health research capacity was consistently  
4  
5 272 applied. There appeared to be no relationship between a favoured capacity term, such as 'building'  
6  
7 273 or 'strengthening', and the type of capacity definition used or the content of that definition. There  
8  
9 274 was no apparent difference between operational definitions of (health) research capacity building,  
10  
11 275 strengthening or development even though distinctions between these terms and the concepts they  
12  
13 276 represent have previously been drawn <sup>8 10 37</sup>. The content analysis identified a divide between many  
14  
15 277 of the capacity definitions presented and current conceptualisations of a multi-level 'systems'  
16  
17 278 approach to HRCS <sup>5 6</sup>. For example, only 36% of the proffered definitions made explicit reference to  
18  
19 279 individual, institutional and environmental level capacity strengthening and only 12% explicitly  
20  
21 280 applied the definition to all stages of the research process from conception to subsequent uptake.  
22  
23  
24  
25

26  
27  
28  
29  
30  
31  
32  
33  
34  
35  
36  
37  
38  
39  
40  
41  
42  
43  
44  
45  
46  
47  
48  
49  
50  
51  
52  
53  
54  
55  
56  
57  
58  
59  
60

281  
282 There was little sign of cohesion or 'connectedness' across the HRCS-related peer-reviewed  
283 literature. Greater use of theory of change or logic models in HRCS programme and evaluation  
284 design was advocated <sup>31-34</sup> and evident among the sub-set of articles focusing on HRCS methods for  
285 implementation <sup>27 28 30 32</sup>. However, systematic reviews or syntheses of available evidence were  
286 uncommon, despite the relatively narrow focus of the collective literature, and the available  
287 conceptual models and methodologies were rarely applied in practice. For example, learning and  
288 evaluation studies were typically retrospective and capacity assessments limited to a single 'fixed'  
289 time point, in contrast to the prospective, phased approaches deemed necessary to advance our  
290 understanding of what works well in HRCS implementation <sup>28 32</sup>. Furthermore, while multi-level,  
291 systems wide HRCS interventions are increasingly advocated <sup>5-7</sup>, learning and evaluation studies  
292 commonly centred on individual-level education-based activities. This may reflect intervention or  
293 evaluation design, but either way highlights the absence of a widely accepted overarching (H)RCS  
294 framework to promote prevailing theories and concepts or to link the increasingly active HRCS  
295 research community.

296

1  
2  
3 297 Collectively, findings suggest the existing (published) evidence-base is not yet sufficiently developed  
4  
5 298 to reliably inform HRCS interventions in LMICs. The disjointed research effort is exacerbated by the  
6  
7 299 absence of a recognisable HRCS research 'field' and the lack of a defined, needs-based HRCS-specific  
8  
9 300 research agenda. Published research primarily consists of anecdotal, qualitative or descriptive  
10  
11 301 accounts of single interventions not readily generalizable across different types of HRCS or to regions  
12  
13 302 outside of Africa. While research quality was not formally assessed in the context of this review, the  
14  
15 303 body of evidence needs further development when considered against relevant standards such as  
16  
17 304 the Medical Research Council's guidance for developing and evaluating complex interventions<sup>38</sup> or  
18  
19 305 against common hierarchies of evidence<sup>39</sup>, inclusive of hierarchies specifically for assessing  
20  
21 306 qualitative health research<sup>40</sup>. Good research practice would further suggest that no new 'learning'  
22  
23 307 studies should be completed without first reviewing the existing evidence of 'what works' or 'lessons  
24  
25 308 learned' from previous investments or interventions<sup>41</sup>.

26  
27  
28  
29 309  
30  
31 310 Three comprehensive definitions that explicitly align with current HRCS guidelines were evident  
32  
33 311 across the reviewed publications, although all three pertain to the broader notion of 'research  
34  
35 312 capacity' strengthening. These included: "the ongoing process of empowering individuals,  
36  
37 313 institutions, organisations, and nations to: define and prioritise problems systematically; develop  
38  
39 314 and scientifically evaluate appropriate solutions; and share and apply the knowledge generated"<sup>42</sup>;  
40  
41 315 "the process by which individuals, organisations, and societies develop abilities (individually and  
42  
43 316 collectively) to perform functions effectively, efficiently and in a sustainable manner to define  
44  
45 317 problems, set objectives and priorities, build sustainable institutions and bring solutions to key  
46  
47 318 national problems"<sup>43</sup>; and "strengthening the abilities of individuals, institutions, and countries to  
48  
49 319 perform research functions, defining national problems and priorities, solving national problems,  
50  
51 320 utilizing the results of research in policy making and programme delivery"<sup>44</sup>.

52  
53  
54  
55 321

1  
2  
3 322 In our opinion, the RCS definition presented by Lansang and Dennis <sup>42</sup> is the best among those  
4  
5 323 presented in this review. This definition not only reflects current HRCS 'best practice' (i.e.  
6  
7 324 encompasses all three levels of research capacity and spans the research process from conception to  
8  
9 325 uptake) but also positions RCS as an 'ongoing process' and places few parameters on the focus of the  
10  
11 326 research to be supported (beyond defining and prioritising 'problems' systematically). Alternative  
12  
13 327 definitions, such as those provided by the Global Forum for Health Research <sup>43</sup> or the United Nations  
14  
15 328 Development Program <sup>44</sup>, limit the HRCS focus to '(key) national problems'. Whilst a focus on  
16  
17 329 national problems is undoubtedly important, these definitions suggest restrictions on what types of  
18  
19 330 research capacity should be strengthened. The more comprehensive, and more frequently used,  
20  
21 331 'research capacity' definitions further raise the possibility that a health-specific RCS definition may  
22  
23 332 not be needed. Arguably, a comprehensive, rather than sector-specific, RCS definition would  
24  
25 333 suitably reflect contemporary HRCS approaches and illuminate the potential for health-specific RCS  
26  
27 334 interventions to enhance capacity for all/additional (i.e. non-health) research areas within a target  
28  
29 335 institution or environment (where applicable). Whilst discipline specific nuance may sometimes be  
30  
31 336 required, promoting this kind of inter-sectoral, systems level thinking and discouraging vertical,  
32  
33 337 parallel processes that can arise from topic-specific interventions, is increasingly advocated in the  
34  
35 338 health sector <sup>45 46</sup> and is equally applicable in the context of a national research system.  
36  
37  
38  
39

40  
41 340 Determining a needs-based HRCS-specific research agenda would ideally involve input from  
42  
43 341 influential HRCS funders, implementers and researchers from multiple disciplines. Technical working  
44  
45 342 groups, specialist meetings and the creation of networking and resource sharing platforms would be  
46  
47 343 required to establish and promote the research agenda and a common HRCS implementation  
48  
49 344 science. Specialist meetings and HRCS research networks would also serve to raise the profile of  
50  
51 345 HRCS science, increasing its standing and recognition as a legitimate field of scientific investigation  
52  
53 346 and attracting greater involvement from the broader health research community. Funding to  
54  
55 347 support these activities for strengthening research systems could be modelled on existing  
56  
57  
58  
59  
60

1  
2  
3 348 mechanisms operating for strengthening health systems, where it is recommended that global  
4  
5 349 development partners involved in health systems strengthening dedicate 5-10% of programme funds  
6  
7 350 to data collection, monitoring and evaluation and implementation research <sup>47</sup>. Without an agreed  
8  
9 351 definition and understanding of HRCS, it is difficult to calculate annual investment in HRCS in LMICs,  
10  
11 352 but the sum is likely to be substantial. For example, the United Kingdom's 'Global Challenges  
12  
13 353 Research Fund' totals 1.5 billion pounds over a five-year period to support cutting edge research  
14  
15 354 addressing challenges faced by developing countries, a significant proportion of which is allocated  
16  
17 355 for strengthening capacity for research and innovation within LMICs  
18  
19 356 (<http://www.rcuk.ac.uk/funding/gcrf/>). Thus, a 5% investment in (H)RCS implementation science  
20  
21 357 could support a substantial research effort and rapidly accelerate learning about how to do HRCS  
22  
23 358 more effectively.  
24  
25  
26  
27

28  
29 360 Crucially, given the aim of the HRCS research endeavour, ensuring equitable participation by LMIC  
30  
31 361 partners in the development of an HRCS implementation science is essential. Metrics that better  
32  
33 362 account for LMIC contribution may assist this. Despite promising findings, such as relatively high  
34  
35 363 levels of LMIC authorship, questions can be raised as to what extent such indicators reliably reflect  
36  
37 364 equitable contribution in HRCS implementation and research <sup>48</sup>. Relatively few studies examined  
38  
39 365 North-South HRCS partnerships (a dominant form of HRCS implementation) from an exclusively  
40  
41 366 southern perspective, or contrasted North-South models with South-South variants, suggesting an  
42  
43 367 absence of critical reflection on the experiences and realities of those for whom HRCS interventions  
44  
45 368 are intended. Such 'silencing' in intervention design and development should be rectified if  
46  
47 369 ownership (an essential element of sustainability for HRCS interventions) <sup>49-51</sup> is to be promoted.  
48  
49 370 Conversely, it is widely acknowledged that equitable and effective partnerships should be of mutual  
50  
51 371 benefit to all parties <sup>52</sup>, yet benefits to the more strongly capacitated partners in HRCS  
52  
53 372 implementation (e.g. those in HIC) were rarely discussed. Consideration of such issues will likely  
54  
55 373 afford deeper insights into how power and politics influence equity in the design and development  
56  
57  
58  
59  
60

1  
2  
3 374 of HRCS theory and implementation, as well as allowing more rigorous examination as to which  
4  
5 375 models of implementation provide the most equitable, efficient and sustainable gains for HRCS.  
6

7 376

8  
9 377

## 10 11 12 378 **Conclusions & Recommendations**

13  
14  
15 379

16  
17 380 The review findings indicate a HRCS research field with a focus on implementation science is  
18  
19 381 emerging, although the conceptual and empirical bases are not yet sufficiently advanced to  
20  
21 382 effectively inform HRCS programme planning. The constituent parts for a coherent and conceptually  
22  
23 383 driven research effort are present (if somewhat embryonic), but are not yet aligned under a  
24  
25 384 recognisable 'HRCS implementation science' framework. Consolidating a HRCS implementation  
26  
27 385 science therefore presents as a viable option that may accelerate the development of a useful  
28  
29 386 evidence-base to inform HRCS programme planning. Identifying an agreed operational definition of  
30  
31 387 HRCS, standardising HRCS-related terminology, developing a needs-based HRCS-specific research  
32  
33 388 agenda and synthesising currently available evidence may be useful first steps. Crucially, given the  
34  
35 389 aim of the HRCS research endeavour, ensuring equitable participation by LMIC partners in the  
36  
37 390 development of an HRCS implementation science is essential. Advancing a dedicated HRCS  
38  
39 391 implementation science will require specialist meetings (e.g. technical working groups, research  
40  
41 392 priority setting forums) with representation from influential HRCS researchers, key LMIC partners,  
42  
43 393 funders and implementers as well as the creation and maintenance of networking and resource  
44  
45 394 sharing fora. The continued, substantial investment in HRCS in LMICs suggests apportioning a  
46  
47 395 fraction of the various research and development budgets to support HRCS implementation science  
48  
49 396 would represent a good 'buy'.  
50  
51

52  
53 397

54  
55  
56  
57 398

399

400

401

402

403

## References

1. McKee M, Stuckler D, Basu S. Where there is no health research: What can be done to fill the global gaps in health research? *PLoS medicine* 2012;9(4) doi: 10.1371/journal.pmed.1001209
2. Kebede D, Zielinski C, Mbondji PE, et al. Human resources in health research institutions in sub-Saharan African countries: results of a questionnaire-based survey. *Journal of the Royal Society of Medicine* 2014;107(Suppl. 1):85-95.
3. Kebede D, Zielinski C, Mbondji PE, et al. Institutional facilities in national health research systems in sub-Saharan African countries: results of a questionnaire-based survey. *Journal of the Royal Society of Medicine* 2014;107(1 suppl):96-104. doi: 10.1177/0141076813517680
4. Ijsselmuiden C, Marais DL, Becerra-Posada F, et al. Africa's neglected area of human resources for health research - the way forward. *South African Medical Journal* 2012;102(4):228-33.
5. Ghaffar A, Ijsselmuiden C, Zucker F. Changing mindsets: Research capacity strengthening in low- and middle-income countries. Geneva: COHRED, Global Forum for Health Research and UNICEF/UNDP/World Bank/WHO Special Programme for Research and Training in Tropical Diseases (TDR), 2008.
6. ESSENCE. Planning, monitoring and evaluation framework for research capacity strengthening. Geneva: TDR-ESSENCE on Health Research, 2016.
7. DFID. Capacity building in research: A DFID practice paper. In: Department for International Development, ed. London, 2010.
8. Franzen SR, Chandler C, Lang T. Health research capacity development in low and middle income countries: reality or rhetoric? A systematic meta-narrative review of the qualitative literature. *BMJ open* 2017;7(1):e012332. doi: 10.1136/bmjopen-2016-012332
9. Commission on Health Research for Development. Health Research: Essential Link to Equity in Development. Cambridge, USA: Commission on Health Research for Development, 1990.
10. Redman-Maclaren M, MacLaren DJ, Harrington H, et al. Mutual research capacity strengthening: a qualitative study of two-way partnerships in public health research. *International journal for equity in health* 2012;11(79):
11. Levac D, Colquhoun H, O'Brien KK. Scoping studies: advancing the methodology. *Implementation science : IS* 2010;5:69. doi: 10.1186/1748-5908-5-69
12. Arksey H, O'Malley L. Scoping studies: towards a methodological framework. *International Journal of Social Research Methodology* 2005;8(1):19-32.
13. Byrne E, Donaldson L, Manda-Taylor L, et al. The use of technology enhanced learning in health research capacity development: lessons from a cross country research partnership. *Globalization and health* 2016;12(19):

- 1  
2  
3 437 14. Bennett S, Paina L, Ssengooba F, et al. The impact of Fogarty International Center research  
4 438 training programs on public health policy and program development in Kenya and Uganda.  
5 439 *BMC public health* 2013;13(770):  
6 440 15. Zachariah R, Guillermin N, Berger S, et al. Research to policy and practice change: is capacity  
7 441 building in operational research delivering the goods? *Tropical Medicine and International*  
8 442 *Health* 2014;19(9):1068-75.  
9 443 16. Mahmood S, Hort K, Ahmed S, et al. Strategies for capacity building for health research in  
10 444 Bangladesh: Role of core funding and a common monitoring and evaluation framework.  
11 445 *Health research policy and systems* 2011;9 doi: 10.1186/1478-4505-9-31  
12 446 17. Wilson LL, Rice M, Jones CT, et al. Enhancing research capacity for global health: Evaluation of a  
13 447 distance-based program for international study coordinators. *Journal of Continuing*  
14 448 *Education in the Health Professions* 2013;33(1):67-75. doi: 10.1002/chp.21167  
15 449 18. Goto A, Nguyen Quang V, Nguyen Thi Tu V, et al. Epidemiology research training in Vietnam:  
16 450 evaluation at the five year mark. *Fukushima journal of medical science* 2010;56(1):63-70.  
17 451 19. Thomson DR, Semakula M, Hirschhorn LR, et al. Applied statistical training to strengthen analysis  
18 452 and health research capacity in Rwanda. *Health research policy and systems* 2016;14(1) doi:  
19 453 10.1186/s12961-016-0144-x  
20 454 20. Mahendradhata Y, Nabieva J, Ahmad RA, et al. Promoting good health research practice in low-  
21 455 and middle-income countries. *Global health action* 2016;9:32474. doi:  
22 456 10.3402/gha.v9.32474  
23 457 21. Minja H, Nsanjabana C, Maure C, et al. Impact of health research capacity strengthening in low-  
24 458 and middle-income countries: the case of WHO/TDR programmes. *PLoS neglected tropical*  
25 459 *diseases* 2011;5(10):e1351-e51.  
26 460 22. Kaser M, Maure C, Halpaap BM, et al. Research Capacity Strengthening in Low and Middle  
27 461 Income Countries - An Evaluation of the WHO/TDR Career Development Fellowship  
28 462 Programme. *PLoS neglected tropical diseases* 2016;10(5):e0004631. doi:  
29 463 10.1371/journal.pntd.0004631  
30 464 23. Bates I, Boyd A, Smith H, et al. A practical and systematic approach to organisational capacity  
31 465 strengthening for research in the health sector in Africa. *Health research policy and systems*  
32 466 2014;12(11):  
33 467 24. Cole DC, Boyd A, Aslanyan G, et al. Indicators for tracking programmes to strengthen health  
34 468 research capacity in lower- and middle-income countries: a qualitative synthesis. *Health*  
35 469 *research policy and systems* 2014;12(17):  
36 470 25. Gadsby EW. Research capacity strengthening: donor approaches to improving and assessing its  
37 471 impact in low- and middle-income countries. *International Journal of Health Planning and*  
38 472 *Management* 2011;26(1):89-106.  
39 473 26. Boyd A, Cole DC, Cho DB, et al. Frameworks for evaluating health research capacity  
40 474 strengthening: a qualitative study. *Health research policy and systems* 2013;11(46):  
41 475 27. Bates I, Boyd A, Aslanyan G, et al. Tackling the tensions in evaluating capacity strengthening for  
42 476 health research in low- and middle-income countries. *Health policy and planning*  
43 477 2015;30(3):334-44.  
44 478 28. Kutcher S, Horner B, Cash C, et al. Building psychiatric clinical research capacity in low and middle  
45 479 income countries: The Cuban-Canadian partnership project. *Innovation Journal* 2010;15(1):1-  
46 480 10.  
47 481 29. Goto A, Thi Ngoc Phuong N, Thi Mai Huong N, et al. Building postgraduate capacity in medical  
48 482 and public health research in Vietnam: An in-service training model. *Public health*  
49 483 2005;119(3):174-83. doi: 10.1016/j.puhe.2004.05.005  
50 484 30. Mugabo L, Rouleau D, Odhiambo J, et al. Approaches and impact of non-academic research  
51 485 capacity strengthening training models in sub-Saharan Africa: a systematic review. *Health*  
52 486 *research policy and systems* 2015;13(30):

- 1  
2  
3 487 31. Huber J, Nepal S, Bauer D, et al. Tools and instruments for needs assessment, monitoring and  
4 488 evaluation of health research capacity development activities at the individual and  
5 489 organizational level: A systematic review. *Health research policy and systems* 2015;13(1) doi:  
6 490 10.1186/s12961-015-0070-3  
7 491 32. Adedokun BO, Olopade CO, Olopade OI. Building local capacity for genomics research in Africa:  
8 492 Recommendations from analysis of publications in Sub-Saharan Africa from 2004 to 2013.  
9 493 *Global health action* 2016;9(1) doi: 10.3402/gha.v9.31026  
10 494 33. González-Block MA, Vargas-Riaño EM, Sonela N, et al. Research capacity for institutional  
11 495 collaboration in implementation research on diseases of poverty. *Tropical Medicine and*  
12 496 *International Health* 2011;16(10):1285-90.  
13 497 34. San Sebastian M, Hurtig AK. Review of health research on indigenous populations in Latin  
14 498 America, 1995-2004. *Salud publica de Mexico* 2007;49(4):316-20. [published Online First:  
15 499 2007/08/22]  
16 500 35. Bates I, Akoto AY, Ansong D, et al. Evaluating health research capacity building: an evidence-  
17 501 based tool. *PLoS medicine* 2006;3(8):e299. doi: 10.1371/journal.pmed.0030299  
18 502 36. UKCDS. Health Research Capacity Strengthening: A A UKCDS Mapping. London: United Kingdom  
19 503 Collaborative on Development Sciences (UKCDS), 2015.  
20 504 37. Vasquez EE, Hirsch JS, Giang le M, et al. Rethinking health research capacity strengthening.  
21 505 *Global public health* 2013;8 Suppl 1:S104-24. doi: 10.1080/17441692.2013.786117  
22 506 38. Craig P, Dieppe P, Macintyre S, et al. Developing and evaluating complex interventions: the new  
23 507 Medical Research Council guidance. *BMJ* 2008;337:a1655. doi: 10.1136/bmj.a1655  
24 508 39. Petticrew M, Roberts H. Evidence, hierarchies, and typologies: horses for courses. *Journal of*  
25 509 *epidemiology and community health* 2003;57(7):527-9.  
26 510 40. Daly J, Willis K, Small R, et al. A hierarchy of evidence for assessing qualitative health research. *J*  
27 511 *Clin Epidemiol* 2007;60(1):43-9. doi: 10.1016/j.jclinepi.2006.03.014  
28 512 41. Lund H, Brunnhuber K, Juhl C, et al. Towards evidence based research. *BMJ* 2016;355:i5440. doi:  
29 513 10.1136/bmj.i5440  
30 514 42. Lansang MA, Dennis R. Building capacity in health research in the developing world. *Bulletin of*  
31 515 *the World Health Organization* 2004;82(10):764-70.  
32 516 43. Global Forum for Health Research. The 10/90 Report on Health Research 2003-2004. Geneva:  
33 517 Global Forum for Health Research, 2004.  
34 518 44. UNDP. Technical advisory paper, No:2. New York: UNDP, 1999.  
35 519 45. Ooms G, Van Damme W, Baker BK, et al. The 'diagonal' approach to Global Fund financing: a cure  
36 520 for the broader malaise of health systems? *Globalization and health* 2008;4:6. doi:  
37 521 10.1186/1744-8603-4-6  
38 522 46. Hafner T, Shiffman J. The emergence of global attention to health systems strengthening. *Health*  
39 523 *policy and planning* 2013;28(1):41-50. doi: 10.1093/heapol/czs023  
40 524 47. Chan M, Kazatchkine M, Lob-Levyt J, et al. Meeting the demand for results and accountability: a  
41 525 call for action on health data from eight global health agencies. *PLoS medicine*  
42 526 2010;7(1):e1000223. doi: 10.1371/journal.pmed.1000223  
43 527 48. Bradley M. North-south research partnerships: literature review and annotated bibliography.  
44 528 Ottawa, Canada: International Development Research Centre, 2006.  
45 529 49. KFPE. A Guide for Transboundary Research Partnerships: 11 Principles and 7 Questions. Bern,  
46 530 Switzerland: Swiss Commission for Research Partnerships with Developing Countries (KFPE),  
47 531 2012.  
48 532 50. Pryor J, Kuupole A, Kutor N, et al. Exploring the fault lines of cross-cultural collaborative  
49 533 research. *Compare* 2009;39:769-82.  
50 534 51. Dean L, Njelesani J, Smith H, et al. Promoting sustainable research partnerships: a mixed-method  
51 535 evaluation of a United Kingdom-Africa capacity strengthening award scheme. *Health*  
52 536 *research policy and systems* 2015;13(81):



1  
2  
3 537 52. Musolino N, Lazdins J, Toohey J, et al. COHRED Fairness Index for international collaborative  
4 538 partnerships. *Lancet (London, England)* 2015;385(9975):1293-4. doi: 10.1016/S0140-  
5 539 6736(15)60680-8  
6  
7 540

## 541 **Acknowledgements**

542 The authors would like to thank Helen Smith and Janet Njelesani who contributed to an earlier  
543 version of this manuscript. Rachel Tolhurst is also acknowledged for providing a critical review of the  
544 final draft.

## 545 **Funding Statement**

546 This research received no specific grant from any funding agency in the public, commercial or not-  
547 for-profit sectors.

## 548 **Competing Interests**

549 We have read and understood BMJ policy on declaration of interests and declare that we have no  
550 competing interests.

551

## 552 **Authors Contributions**

553 LD, SG and JP were all involved in the search, screening and analysis of research articles. IB provided  
554 technical oversight and expertise throughout the screening processes. All authors contributed to the  
555 content, drafting, review and revisions to the manuscript.

## 556 **Data Sharing Statement**

557 Supplementary files as listed in the main manuscript are available to the reader. There is no other  
558 unpublished data that links to this research.

## 559 **Supporting Information**

60 31

- 1  
2  
3 560 **S1 Table. Supplementary and detailed data for 'learning and evaluation' original research publications.**  
4  
5 561 **S2 Table. Supplementary and detailed data for 'assessments' original research publications**  
6  
7  
8 562 **S3 Table. Supplementary and detailed data for 'HRCS methods for implementation' original research**  
9  
10 563 **publications.**  
11  
12 564 **S4 Table. Supplementary and detailed data for 'Evidence synthesis for RCS implementation and evaluation'**  
13  
14 565 **original research publications.**  
15  
16  
17 566 **S5 Table. Supplementary and detailed data for 'miscellaneous' publications.**  
18  
19  
20 567 **S6 Table. Supplementary and detailed data for 'Perspective, Opinion & Commentary' publications.**  
21  
22  
23 568 **S7 Table. Supplementary and detailed data for 'systematic review' publications.**  
24  
25 569 **S8 Table. List of publications included in the review by typology**  
26  
27  
28 570 **S9 Table. HRCS definitions, sources and citing papers<sup>1</sup>.** 1. Numbered citations in italics pertain to the  
29 571 reference list in Supplementary Table 1. Numbered citations in normal (non-italicised) font are listed below. 2.  
30 572 Presented as a definition of 'Health Systems Research' capacity. 3. Presented as a definition of 'research  
31 573 capacity' in citing publication, but included in the 'health research capacity' definition list as contains specific  
32 574 reference to 'health research'. 4. Cited as definition of 'health' research capacity in [123]. 5. Presented as a  
33 575 definition of 'capacity' in citing publication, but included in the 'research capacity' definition list as contains  
34 576 specific reference to 'research'  
35 577  
36  
37 578 **S10 Table. Content analysis of capacity definitions by capacity term<sup>1</sup>.** 1. Numbered citations pertain to the  
38 579 reference list in Supplementary Table 1. 2. The content of each definition was independently coded according  
39 580 to the following criteria: explicit reference to individual (ind.), institutional (Ins.) or environmental (Env.) level  
40 581 capacity strengthening; explicit reference to strengthening capacity in terms of defining research questions or  
41 582 identifying research priorities (Def.), conducting research or applying research methods (Car.) or  
42 583 communicating and applying research outcomes (App.); explicit reference to facilitating an improvement in  
43 584 research abilities/quality (Qua.) sustainability (Sus.), reference to HRCS as a process (Pro.) and/or HRCS as a  
44 585 continuous activity (Con.).  
45 586  
46  
47  
48 587  
49  
50  
51  
52  
53  
54  
55  
56  
57  
58  
59  
60

1  
2  
3  
4  
5  
6  
7  
8  
9  
10  
11  
12  
13  
14  
15  
16  
17  
18  
19  
20  
21  
22  
23  
24  
25  
26  
27  
28  
29  
30  
31  
32  
33  
34  
35  
36  
37  
38  
39  
40  
41  
42  
43  
44  
45  
46  
47  
48  
49  
50  
51  
52  
53  
54  
55  
56  
57  
58  
59  
60

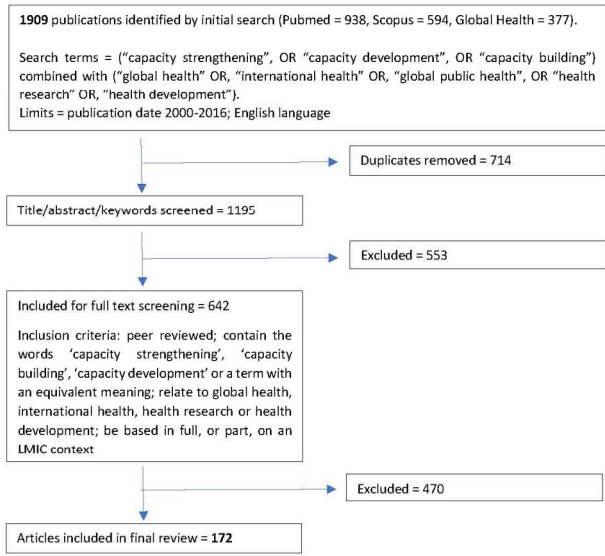

Figure 1. Summary of search and selection process

Figure One: Summary of search and selection process

140x198mm (300 x 300 DPI)

1  
2  
3  
4  
5  
6  
7  
8  
9  
10  
11  
12  
13  
14  
15  
16  
17  
18  
19  
20  
21  
22  
23  
24  
25  
26  
27  
28  
29  
30  
31  
32  
33  
34  
35  
36  
37  
38  
39  
40  
41  
42  
43  
44  
45  
46  
47  
48  
49  
50  
51  
52  
53  
54  
55  
56  
57  
58  
59  
60

Figure 2. Number of publications per year by publication type

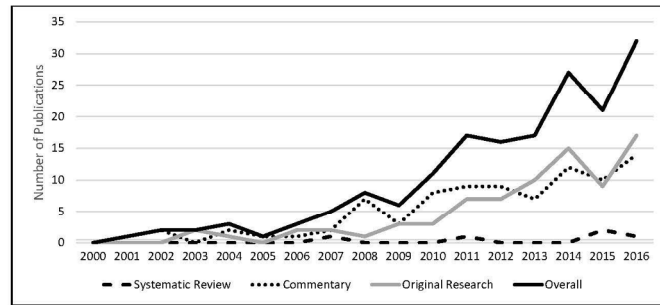

Figure Two: Number of publications per year by publication type

140x198mm (300 x 300 DPI)

Table S1. Supplementary and detailed data for 'learning and evaluation' (from research initiatives) original research publications

| Publication         |      | Publication Characteristics |                        |                 | Programme Characteristics                                     |                                   |          |                                               | Global = 3+regions               |
|---------------------|------|-----------------------------|------------------------|-----------------|---------------------------------------------------------------|-----------------------------------|----------|-----------------------------------------------|----------------------------------|
| Author              | Year | LMIC Authorship             | Capacity Term          | HRCS Definition | Name                                                          | Type                              | Focus    | WHO Region                                    |                                  |
| Byrne et al         | 2016 | Co-author                   | Capacity Development   | Yes             | Development and delivery of a Masters programme               | Education                         | Nth-Sth  | Community Systems Health Research             | African                          |
| Aidam & Sombie      | 2016 | First, last                 | Capacity Development   | No              | West African Health Organisation research development program | Health research system            | Sth-Sth  | Health research                               | African                          |
| Cole et al          | 2016 | Co-author                   | Capacity Strengthening | No              | Malawi's Health research Capacity Strengthening Initiative    | health research system            | National | Health research                               | African                          |
| Elmusharaf et al    | 2016 | First. Co-author            | Capacity Development   | No              | Connecting health research in Africa and Ireland Consortium   | Education; collaborative research | Nth-Sth  | Health systems strengthening                  | African                          |
| Kaser et al         | 2016 | Nil                         | Capacity Strengthening | No              | WHO/TDR Career Development Fellowship Programme               | Placement                         | Nth-Sth  | Clinical research                             | Global                           |
| Abawi et al         | 2016 | Nil                         | Capacity Strengthening | No              | E-learning for RCS                                            | Education                         | Nth-Sth  | Sexual and reproductive health                | Global                           |
| Varshney et al      | 2016 | First, last, co-author      | Capacity Building      | No              | Asian Regional Capacity Development programme                 | Education; collaborative research | Nth-Sth  | Social determinants of health                 | South-East Asia; Western Pacific |
| Thomson et al       | 2016 | First, last, co-author      | Capacity Building      | No              | Applied statistical training to strengthen HRC                | Education                         | Nth-Sth  | Statistical training                          | African                          |
| Atkins et al        | 2016 | Co-author                   | Capacity Building      | No              | Africa/Asian Regional Capacity Development programme          | Education; collaborative research | Nth-Sth  | Health systems; Social determinants of health | Global                           |
| Protsiv & Atkins    | 2016 | Co-author                   | Capacity Building      | No              | Africa/Asian Regional Capacity Development programme          | Education; collaborative research | Nth-Sth  | Health systems; Social determinants of health | Global                           |
| Farnman et al       | 2016 | Co-author                   | Capacity Building      | No              | Africa/Asian Regional Capacity Development programme          | Education; collaborative research | Nth-Sth  | Health systems; Social determinants of health | Global                           |
| Protsiv et al       | 2016 | Co-author                   | Capacity Building      | No              | Africa Regional Capacity Development programme                | Education; collaborative research | Nth-Sth  | Health systems; Social determinants of health | Global                           |
| Mahendradhata et al | 2016 | First, last                 | Capacity Building      | No              | Good Health Research Practice training programme              | Education                         | Nth-Sth  | Good health research practice                 | Global                           |
| Daniels et al       | 2015 | Co-author                   | Capacity Building      | No              | AIDS International Training and Research Program              | Education                         | Nth-Sth  | HIV epidemiology and basic science            | African                          |
| Heller et al        | 2015 | Co-author                   | Capacity Building      | No              | People's Open Access Education Initiative, Peoples-uni        | Education                         | Nth-Sth  | Public health                                 | Global                           |

|    |                      |      |                        |                        |     |                                                         |                           |               |                                        |                          |
|----|----------------------|------|------------------------|------------------------|-----|---------------------------------------------------------|---------------------------|---------------|----------------------------------------|--------------------------|
| 1  |                      |      |                        |                        |     |                                                         |                           |               |                                        |                          |
| 2  | Agar & Zarowsky      | 2015 | Last                   | Capacity Strengthening | No  | Multiple HRCS initiatives (*)                           | NA                        | NA            | NA                                     | African                  |
| 3  |                      |      |                        |                        |     |                                                         |                           |               |                                        |                          |
| 4  | Dean et al           | 2015 | Nil                    | Capacity Strengthening | Yes | RCS Award Scheme (un-named)                             | Collaborative Research    | Nth-Sth       | Life and physical sciences             | African                  |
| 5  |                      |      |                        |                        |     |                                                         |                           |               |                                        |                          |
| 6  | Ndebele et al        | 2014 | First, co-author       | Capacity Building      | No  | FIC research ethics capacity building initiatives (*)   | Education                 | Nth-Sth       | Research ethics                        | African                  |
| 7  |                      |      |                        |                        |     |                                                         |                           |               |                                        |                          |
| 8  | Zachariah et al      | 2014 | Co-author              | Capacity Building      | No  | Structured Operational Research and Training Initiative | Education                 | Nth-Sth       | Operational research                   | Global                   |
| 9  |                      |      |                        |                        |     |                                                         |                           |               |                                        |                          |
| 10 | Saenz et al          | 2014 | Co-author              | Capacity Building      | No  | FIC bioethics training                                  | Education                 | Nth-Sth       | Research ethics                        | Americas                 |
| 11 |                      |      |                        |                        |     |                                                         |                           |               |                                        |                          |
| 12 | Miuro et al          | 2013 | First, co-author, last | Capacity Building      | No  | EDCTP Regional Networks of Excellence                   | Research collaboration    | Nth-Sth       | Clinical trials                        | African                  |
| 13 |                      |      |                        |                        |     |                                                         |                           |               |                                        |                          |
| 14 | Vian et al           | 2013 | Nil                    | Capacity Building      | Yes | Pfizer Global Health Fellows Program                    | Placement                 | Nth-Sth       | Global health                          | Global                   |
| 15 |                      |      |                        |                        |     |                                                         |                           |               |                                        |                          |
| 16 | Wilson et al         | 2013 | Nil                    | Capacity Building      | No  | Promoting Enhanced Research Capacity for Global Health  | Education                 | Nth-Sth       | Clinical research management           | Global                   |
| 17 |                      |      |                        |                        |     |                                                         |                           |               |                                        |                          |
| 18 | Bennett et al        | 2013 | Last, co-author        | Capacity Development   | No  | FIC research training programs(*)                       | Education                 | Nth-Sth       | Health research                        | African                  |
| 19 |                      |      |                        |                        |     |                                                         |                           |               |                                        |                          |
| 20 | Bennett et al        | 2013 | Last, co-author        | Capacity Development   | No  | FIC research training programs(*)                       | Education                 | Nth-Sth       | Health research                        | African                  |
| 21 |                      |      |                        |                        |     |                                                         |                           |               |                                        |                          |
| 22 | Marjanovic et al     | 2013 | Nil                    | Capacity Building      | No  | Africa Institutions initiative                          | Collaborative Research    | Nth-Sth       | Health research                        | African                  |
| 23 |                      |      |                        |                        |     |                                                         |                           |               |                                        |                          |
| 24 | Bennett et al        | 2012 | Last, co-author        | Capacity Development   | Yes | Health policy analysis institutes (*)                   | NA                        | NA            | NA                                     | Global                   |
| 25 |                      |      |                        |                        |     |                                                         |                           |               |                                        |                          |
| 26 | Redman-McLaren et al | 2012 | Co-author              | Capacity Strengthening | Yes | Introduction to Health Research Workshop                | Education                 | Nth-Sth       | Operational research                   | Western Pacific          |
| 27 |                      |      |                        |                        |     |                                                         |                           |               |                                        |                          |
| 28 | Bissell et al        | 2012 | Co-author              | Capacity Building      | No  | Int. Union Against TB & Lung Disease & MSF OR training  | Education                 | Nth-Sth       | Operational research                   | Global                   |
| 29 |                      |      |                        |                        |     |                                                         |                           |               |                                        |                          |
| 30 | Mahmood et al        | 2011 | First, co-author, last | Capacity Building      | Yes | Int. Centre for Diarrhoeal Disease Research, Bangladesh | Financial management      | Institutional | Research funding & perform. monitoring | South East Asia          |
| 31 |                      |      |                        |                        |     |                                                         |                           |               |                                        |                          |
| 32 | Minja et al          | 2011 | First                  | Capacity Strengthening | Yes | WHO/TDR Programmes (*)                                  | Education; Infrastructure | Nth-Sth       | Health research                        | Global                   |
| 33 |                      |      |                        |                        |     |                                                         |                           |               |                                        |                          |
| 34 | Goto et al           | 2010 | Last, co-author        | Capacity Development   | No  | Epidemiology training course for physicians             | Education                 | National      | Epidemiology research                  | Western Pacific          |
| 35 |                      |      |                        |                        |     |                                                         |                           |               |                                        |                          |
| 36 | Mayhew et al         | 2008 | Last, co-author        | Capacity Strengthening | No  | Health Economics & Financing Programme                  | Research collaboration    | Nth-Sth       | Health economics                       | African; South-East Asia |
| 37 |                      |      |                        |                        |     |                                                         |                           |               |                                        |                          |
| 38 | Jonsson et al        | 2007 | Co-author              | Capacity Development   | No  | Health systems research training programmes             | Collaborative Research    | Nth-Sth       | Health systems                         | Western Pacific          |
| 39 |                      |      |                        |                        |     |                                                         |                           |               |                                        |                          |
| 40 | Hyder et al          | 2003 | First, co-author, last | Capacity Development   | No  | Doctoral trainings grants (*)                           | Education                 | Nth-Sth       | Health research                        | Eastern Mediterranean    |
| 41 |                      |      |                        |                        |     |                                                         |                           |               |                                        |                          |
| 42 | Jentsch & Pilley     | 2003 | Nil                    | Capacity Building      | No  | Multinational research project                          | Collaborative research    | Nth-Sth       | Maternal and Child Health              | South East Asia          |
| 43 |                      |      |                        |                        |     |                                                         |                           |               |                                        |                          |
| 44 |                      |      |                        |                        |     |                                                         |                           |               |                                        |                          |
| 45 |                      |      |                        |                        |     |                                                         |                           |               |                                        |                          |
| 46 |                      |      |                        |                        |     |                                                         |                           |               |                                        |                          |
| 47 |                      |      |                        |                        |     |                                                         |                           |               |                                        |                          |

| <b>Learning &amp; Evaluation Characteristics</b>                                                                  |                                                  |                                                      |                                                                                   |                                    |                       |
|-------------------------------------------------------------------------------------------------------------------|--------------------------------------------------|------------------------------------------------------|-----------------------------------------------------------------------------------|------------------------------------|-----------------------|
| Activities                                                                                                        | Objective                                        | Study Design                                         | Data Collection                                                                   | Sampling                           | Data Analysis         |
| Development and delivery of blended (largely web-based) Masters programme; teacher training (to support delivery) | Use of blended learning                          | Prospective; formative; mixed methods                | Online surveys (n=17); IDIs (n=11)                                                | Population                         | Thematic              |
| Research stewardship, financing, creating or sustaining resources, prod. Or using research & dev. partnerships    | Programme outputs; lessons learned               | Retrospective; formative; mixed methods              | Document review; IDIs (n=180); consultation                                       | Purposive                          | Thematic              |
| National priority setting, decision-making on funding, health research actor mobilisation                         | Lessons learned                                  | Retrospective; formative; mixed methods; independent | Document review; IDIs (n=30)                                                      | Purposive; random                  | Thematic              |
| PhD scholarship; capacity assessment; project specific capacity building and/or research activities               | Lessons learned                                  | Prospective; summative; qualitative                  | Reflection; document review                                                       | Convenience                        | Thematic              |
| 12-month placement at pharmaceutical company or PDP; administrative grant; networking                             | Programme outputs; outcomes; lessons learned     | Retrospective; summative; mixed methods              | Survey (n=33); IDIs                                                               | Population; purposive              | Descriptive; thematic |
| Online education                                                                                                  | Programme outputs; outcomes                      | Retrospective; summative; quantitative               | Online survey (n=175)                                                             | Population                         | Descriptive           |
| Short-term training; long-term training; joint research                                                           | Research partnerships                            | Prospective; formative; qualitative                  | IDIs (n=16)                                                                       | Population                         | Thematic              |
| Short-term training                                                                                               | Programme outcomes                               | Prospective; summative; quantitative                 | Surveys (n=14-20)                                                                 | Population                         | Descriptive           |
| Short-term training; long-term training; joint research                                                           | Use of blended learning                          | Prospective; summative; quantitative                 | Survey (n=82)                                                                     | Population                         | Inferential           |
| Short-term training; long-term training; joint research                                                           | Use of blended learning                          | Prospective; formative; qualitative                  | IDIs (n=11)                                                                       | Purposive                          | Thematic              |
| Short-term training; long-term training; joint research                                                           | Lessons learned                                  | Prospective; formative; mixed methods                | IDIs (n=16); document review                                                      | Population                         | Thematic              |
| Short-term training; long-term training; joint research                                                           | Use of blended learning                          | Prospective; formative; mixed methods                | Group discussion (n=3); participant observation (n=11); survey (n=18); IDIs (n=?) | Population; purposive; convenience | Descriptive; thematic |
| Short-term training                                                                                               | Lessons learned; programme outcomes              | Prospective; formative; mixed methods                | Course feedback (multiple methods; n=58); qualitative assessment                  | Population                         | Descriptive; thematic |
| Short-term training; long-term training (MS, MPH, PhD)                                                            | Transfer of a health research training programme | Retrospective; formative; qualitative                | IDIs (n=10)                                                                       | Purposive                          | Thematic              |
| Distance learning MPH                                                                                             | Alumni collaboration                             | Retrospective; formative; mixed methods              | Survey (n=68); online discussion forums                                           | Population; convenience            | Descriptive; thematic |

|    |                                                                                                               |                                              |                                                      |                                                   |                        |                       |
|----|---------------------------------------------------------------------------------------------------------------|----------------------------------------------|------------------------------------------------------|---------------------------------------------------|------------------------|-----------------------|
| 1  |                                                                                                               |                                              |                                                      |                                                   |                        |                       |
| 2  | NA                                                                                                            | Lessons learned                              | Prospective; formative; qualitative                  | Document review; reflection; consultation (n=37)  | Convenience            | Thematic              |
| 3  |                                                                                                               |                                              |                                                      |                                                   |                        |                       |
| 4  | Funding to support delivery of a collaborative research project                                               | Research partnerships                        | Retrospective; formative; mixed methods; independent | Online surveys (n=23); IDIs/FGDs (n=42)           | purposive; convenience | Descriptive; thematic |
| 5  |                                                                                                               |                                              |                                                      |                                                   |                        |                       |
| 6  | Training; mentorship; placements; web/electronic resources; public lectures, symposia; curriculum development | Lessons learned                              | Retrospective; formative; mixed methods              | Survey (n=9); document review                     | Purposive              | Thematic              |
| 7  |                                                                                                               |                                              |                                                      |                                                   |                        |                       |
| 8  | Workshop                                                                                                      | Programme outputs; outcomes                  | Retrospective; summative; quantitative               | Document review; survey (n=88)                    | Population             | Descriptive           |
| 9  |                                                                                                               |                                              |                                                      |                                                   |                        |                       |
| 10 | Training (inclusive of certificate, diploma, masters) and fellowships                                         | Programme outputs; lessons learned           | Retrospective; formative; mixed methods              | Document review; survey; consultation             | Purposive              | Thematic              |
| 11 | Training; infrastructure development; research funding; research collaboration                                | Programme outputs; lessons learned           | Retrospective; formative; mixed methods              | Direct observation; document review               | Convenience            | Descriptive; thematic |
| 12 |                                                                                                               |                                              |                                                      |                                                   |                        |                       |
| 13 | Training; technical assistance                                                                                | Lessons learned                              | Retrospective; formative; qualitative; independent   | Document review; IDIs (n = 9)                     | Purposive              | Thematic              |
| 14 |                                                                                                               |                                              |                                                      |                                                   |                        |                       |
| 15 | Online continuing education course                                                                            | Programme outputs; outcomes; lessons learned | Prospective; summative; quantitative                 | Surveys (x4, n= 21-166)                           | Population             | Descriptive           |
| 16 |                                                                                                               |                                              |                                                      |                                                   |                        |                       |
| 17 | Training (Masters and PhD) and fellowships                                                                    | Mentorship                                   | Retrospective; formative; qualitative                | IDIs/FGDs (n=72)                                  | Purposive              | Thematic              |
| 18 |                                                                                                               |                                              |                                                      |                                                   |                        |                       |
| 19 | Training (Masters and PhD) and fellowships                                                                    | Programme outcomes                           | Retrospective; summative; mixed methods              | IDIs/FGDs (n=52); survey, (n=29); document review | Purposive; random      | Descriptive; thematic |
| 20 |                                                                                                               |                                              |                                                      |                                                   |                        |                       |
| 21 | Funding to support delivery of a collaborative research project.                                              | Lessons learned                              | Prospective; formative; mixed methods; independent   | Document review; consultation; survey (n=51)      | Purposive              | Thematic              |
| 22 | Funding to support advanced research training                                                                 |                                              |                                                      |                                                   |                        |                       |
| 23 | NA                                                                                                            | Lessons learned                              | Retrospective; formative; mixed methods; independent | IDIs (n=80); document review                      | Purposive              | Descriptive; thematic |
| 24 |                                                                                                               |                                              |                                                      |                                                   |                        |                       |
| 25 | Workshop                                                                                                      | Workshop participation dynamics              | Retrospective; formative; qualitative                | IDIs (n=5); written responses (n=5)               | Purposive              | Thematic              |
| 26 |                                                                                                               |                                              |                                                      |                                                   |                        |                       |
| 27 | Workshop                                                                                                      | Programme outputs; lessons learned           | Retrospective; summative; quantitative               | Survey (n=12); document review                    | Population             | Descriptive           |
| 28 |                                                                                                               |                                              |                                                      |                                                   |                        |                       |
| 29 | Implementation of a revised funding and performance monitoring framework                                      | Programme outputs; outcomes                  | Retrospective; summative; mixed methods              | KII; document review; survey                      | Purposive              | Descriptive; thematic |
| 30 |                                                                                                               |                                              |                                                      |                                                   |                        |                       |
| 31 | Research training grants; research re-entry grants; institution strengthening grants                          | Programme outcomes                           | Retrospective; summative; mixed methods              | Survey (n=92); IDIs (n=10)                        | Population; purposive  | Descriptive; thematic |
| 32 |                                                                                                               |                                              |                                                      |                                                   |                        |                       |
| 33 | Workshop                                                                                                      | Programme outputs; outcomes                  | Prospective; summative; quantitative                 | Surveys (x2, n = 8-70)                            | Population             | Descriptive           |
| 34 |                                                                                                               |                                              |                                                      |                                                   |                        |                       |
| 35 | Joint research, publication & funding applications; staff exchanges/training; teaching & TA; small grants     | Programme outputs; lessons learned           | Retrospective; formative; mixed methods              | Document review; IDIs (n=25)                      | Purposive              | Descriptive; thematic |
| 36 | Training; funding to support delivery of a collaborative research project                                     | Informing policy and practice                | Retrospective; formative; mixed-methods              | IDIs/FGDs (n=28); survey (n=56)                   | Purposive              | Thematic              |
| 37 |                                                                                                               |                                              |                                                      |                                                   |                        |                       |
| 38 | Doctoral training                                                                                             | Programme outputs                            | Retrospective; summative; quantitative; independent  | Survey (n=54)                                     | Convenience            | Descriptive           |
| 39 |                                                                                                               |                                              |                                                      |                                                   |                        |                       |
| 40 | Funding to support delivery of a collaborative research project                                               | Research partnerships                        | Retrospective; formative; qualitative                | IDIs (n=7)                                        | purposive; convenience | Thematic              |
| 41 |                                                                                                               |                                              |                                                      |                                                   |                        |                       |
| 42 |                                                                                                               |                                              |                                                      |                                                   |                        |                       |
| 43 |                                                                                                               |                                              |                                                      |                                                   |                        |                       |
| 44 |                                                                                                               |                                              |                                                      |                                                   |                        |                       |
| 45 |                                                                                                               |                                              |                                                      |                                                   |                        |                       |
| 46 |                                                                                                               |                                              |                                                      |                                                   |                        |                       |
| 47 |                                                                                                               |                                              |                                                      |                                                   |                        |                       |



Table S2. Supplementary and detailed data for 'Capacity Assessment' original research publications

| Publication     | Publication Characteristics |                        |                        |                 |                                                                                                                   |
|-----------------|-----------------------------|------------------------|------------------------|-----------------|-------------------------------------------------------------------------------------------------------------------|
| Author          | Year                        | LMIC Authorship        | Capacity Term          | HRCS Definition | Assessment of                                                                                                     |
| Erasmus et al   | 2016                        | First, co-author, last | Capacity Strengthening | No              | Postgraduate teaching capacity                                                                                    |
| Uzochukwu et al | 2016                        | First, co-author, last | Capacity Building      | No              | Capacity needs for health systems policy and systems research and analysis                                        |
| Motari et al    | 2015                        | First, co-author, last | Capacity Strengthening | No              | Readiness of national ethics committees to respond to challenges posed by a globalised biomedical research system |
| Agyepong et al  | 2015                        | First, co-author, last | Capacity Strengthening | No              | Capacity needs for health policy and systems research and analysis, conduct and teaching                          |
| Oliver et al    | 2015                        | Last                   | Capacity Strengthening | No              | Capacity for conducting systematic reviews                                                                        |
| Haafkens et al  | 2014                        | Nil                    | Capacity Building      | No              | Training needs of researchers to conduct research                                                                 |
| Kilic et al     | 2014                        | First, co-author, last | Capacity Building      | Yes             | Research capacity and training needs                                                                              |
| Kebede et al    | 2014                        | First, co-author       | Capacity Development   | Yes             | Human capacity and staff movement                                                                                 |

|    |                 |                             |                        |     |                                   |
|----|-----------------|-----------------------------|------------------------|-----|-----------------------------------|
| 1  |                 |                             |                        |     |                                   |
| 2  | Simba et al     | 2014 First, co-author, last | Capacity Strengthening | Yes | Human and financial resources     |
| 3  |                 |                             |                        |     | capacities, policies and          |
| 4  |                 |                             |                        |     | organisational support            |
| 5  | Ekeroma et al   | 2014 Nil                    | Capacity Building      | No  | Clinical research activity and    |
| 6  |                 |                             |                        |     | audit                             |
| 7  |                 |                             |                        |     |                                   |
| 8  |                 |                             |                        |     |                                   |
| 9  |                 |                             |                        |     |                                   |
| 10 | Kanoute et al   | 2014 First, co-author       | Capacity Strengthening | No  | Current status of oral health     |
| 11 |                 |                             |                        |     | research                          |
| 12 | Franzen et al   | 2013 Co-author              | Capacity Strengthening | No  | Barriers and enablers to          |
| 13 |                 |                             |                        |     | investigator-initiated trials     |
| 14 |                 |                             |                        |     |                                   |
| 15 |                 |                             |                        |     |                                   |
| 16 | Mirzoev et al   | 2014 Last, co-author        | Capacity Strengthening | Yes | Capacity for health policy and    |
| 17 |                 |                             |                        |     | systems research and analysis     |
| 18 |                 |                             |                        |     |                                   |
| 19 | Hofman et al    | 2013 First, co-author       | Capacity Building      | No  | Current status of health equity   |
| 20 |                 |                             |                        |     | and Social Determinants of        |
| 21 |                 |                             |                        |     | Health training                   |
| 22 |                 |                             |                        |     |                                   |
| 23 | Nachega et al   | 2012 First, co-author, last | Capacity Building      | No  | Epidemiology and public health    |
| 24 |                 |                             |                        |     | capacity                          |
| 25 | Paulus et al    | 2012 Co-author              | Capacity Development   | No  | Global training priorities, unmet |
| 26 |                 |                             |                        |     | needs and potential cross-        |
| 27 |                 |                             |                        |     | cohort solutions                  |
| 28 |                 |                             |                        |     |                                   |
| 29 | Peykari et al   | 2012 First, co-author, last | Capacity Building      | No  | Health Systems Research –         |
| 30 |                 |                             |                        |     | ranking of institutions           |
| 31 |                 |                             |                        |     |                                   |
| 32 | Magesa et al    | 2011 First, co-author, last | Capacity Building      | No  | Capacity building process of      |
| 33 |                 |                             |                        |     | Tanzanian National Institute for  |
| 34 |                 |                             |                        |     | Medical Research                  |
| 35 |                 |                             |                        |     |                                   |
| 36 | Mohammadi et al | 2011 First, co-author, last | Capacity Building      | No  | Representation of different       |
| 37 |                 |                             |                        |     | nations in international public   |
| 38 |                 |                             |                        |     | health journals                   |
| 39 | Nakanjaro et al | 2011 First, co-author, last | Capacity Building      | No  | Status and nature of mentoring    |
| 40 |                 |                             |                        |     | practices                         |
| 41 |                 |                             |                        |     |                                   |
| 42 |                 |                             |                        |     |                                   |
| 43 |                 |                             |                        |     |                                   |
| 44 |                 |                             |                        |     |                                   |
| 45 |                 |                             |                        |     |                                   |
| 46 |                 |                             |                        |     |                                   |
| 47 |                 |                             |                        |     |                                   |

|    |                       |                             |                      |    |                                                                                  |
|----|-----------------------|-----------------------------|----------------------|----|----------------------------------------------------------------------------------|
| 1  |                       |                             |                      |    |                                                                                  |
| 2  | Pepping               | 2010 Nil (1)                | Capacity development | No | Training capacity in public health nutrition                                     |
| 3  |                       |                             |                      |    |                                                                                  |
| 4  |                       |                             |                      |    |                                                                                  |
| 5  |                       |                             |                      |    |                                                                                  |
| 6  |                       |                             |                      |    |                                                                                  |
| 7  |                       |                             |                      |    |                                                                                  |
| 8  | Redman-MacLaren et al | 2010 Co-author              | Capacity Building    | No | Public Health literature in Salomon Island                                       |
| 9  |                       |                             |                      |    |                                                                                  |
| 10 |                       |                             |                      |    |                                                                                  |
| 11 | Nyika et al           | 2009 First, co-author, last | Capacity Building    | No | Composition, training needs and independence of ethics committees                |
| 12 |                       |                             |                      |    |                                                                                  |
| 13 |                       |                             |                      |    |                                                                                  |
| 14 | Malekafzali et al     | 2009 First, co-author, last | Capacity Building    | No | Research activities in medical universities and their affiliated institutions    |
| 15 |                       |                             |                      |    |                                                                                  |
| 16 |                       |                             |                      |    |                                                                                  |
| 17 |                       |                             |                      |    |                                                                                  |
| 18 | Moodley & Myer        | 2007 First, last (2)        | Capacity Development | No | Composition, operations, and training needs of health research ethics committees |
| 19 |                       |                             |                      |    |                                                                                  |
| 20 |                       |                             |                      |    |                                                                                  |
| 21 |                       |                             |                      |    |                                                                                  |
| 22 | Singh                 | 2006 First (1)              | Capacity Development | No | Mental health research activities in LMICs                                       |
| 23 |                       |                             |                      |    |                                                                                  |
| 24 |                       |                             |                      |    |                                                                                  |
| 25 |                       |                             |                      |    |                                                                                  |
| 26 | Cuboni et al          | 2004 First, co-author, last | Capacity Development | No | Participation of Fijians in health research publications                         |
| 27 |                       |                             |                      |    |                                                                                  |
| 28 |                       |                             |                      |    |                                                                                  |
| 29 |                       |                             |                      |    |                                                                                  |
| 30 |                       |                             |                      |    |                                                                                  |
| 31 |                       |                             |                      |    |                                                                                  |
| 32 |                       |                             |                      |    |                                                                                  |
| 33 |                       |                             |                      |    |                                                                                  |
| 34 |                       |                             |                      |    |                                                                                  |
| 35 |                       |                             |                      |    |                                                                                  |
| 36 |                       |                             |                      |    |                                                                                  |
| 37 |                       |                             |                      |    |                                                                                  |
| 38 |                       |                             |                      |    |                                                                                  |
| 39 |                       |                             |                      |    |                                                                                  |
| 40 |                       |                             |                      |    |                                                                                  |
| 41 |                       |                             |                      |    |                                                                                  |
| 42 |                       |                             |                      |    |                                                                                  |
| 43 |                       |                             |                      |    |                                                                                  |
| 44 |                       |                             |                      |    |                                                                                  |
| 45 |                       |                             |                      |    |                                                                                  |
| 46 |                       |                             |                      |    |                                                                                  |
| 47 |                       |                             |                      |    |                                                                                  |

| Focus                                                   | Name of programme                                                     | Region | Assessment location/level                                                           | Study Design                   | Data Collection                                                                          | Data Analysis         |
|---------------------------------------------------------|-----------------------------------------------------------------------|--------|-------------------------------------------------------------------------------------|--------------------------------|------------------------------------------------------------------------------------------|-----------------------|
| Health systems policy and systems research and analysis | Consortium for Health Policy and Systems Analysis in Africa (CHEPSAA) | Africa | Multiple institutions involved in research (universities and research institutions) | Cross-sectional; mixed methods | Document review; surveys                                                                 | Descriptive; thematic |
| Health systems policy and systems research and analysis | CHEPSAA                                                               | Africa | University                                                                          | Cross-sectional; mixed methods | Document review; interviews (n=9); survey (n=123)                                        | Thematic              |
| Health research ethics                                  | N.A.                                                                  | Africa | Ethic committees (national level)                                                   | Cross-sectional; quantitative  | Survey (n=33)                                                                            | Descriptive           |
| Health systems policy and systems research and analysis | N.A.                                                                  | Africa | University                                                                          | Cross-sectional; mixed methods | Document review; interview (n=1); focus group discussions (n=3); survey (n=67)           | Descriptive; thematic |
| Systematic reviews                                      | N.A.                                                                  | Global | Multiple institutions involved in research (systematic review centres)              | Rapid appraisal; mixed methods | Routine management data; document review; consultation of key informants; surveys (n=22) | Descriptive; thematic |
| Causes of health inequities                             | INDEPTH Network                                                       | Global | Multiple institutions involved in research (research network)                       | Qualitative                    | Online concept mapping (n=82)                                                            | Descriptive thematic  |
| Non-Communicable Diseases research                      | RESCAP-Med                                                            | Europe | Multiple institutions involved in research                                          | Mixed methods                  | Literature review; interviews (n=10); Survey (n=46)                                      | Descriptive; thematic |
| National health research institutions                   | N.A.                                                                  | Africa | Multiple institutions involved in research (health research institutions )          | Quantitative                   | Surveys (n=847)                                                                          | Descriptive           |

|    |                              |                                                                  |           |                                   |                  |                         |                       |
|----|------------------------------|------------------------------------------------------------------|-----------|-----------------------------------|------------------|-------------------------|-----------------------|
| 1  |                              |                                                                  |           |                                   |                  |                         |                       |
| 2  | Health systems research      | Higher Education Alliance for Leadership Through Health (HEALTH) | Africa    | Universities                      | Mixed methods    | Document review; self-  | Descriptive; thematic |
| 3  |                              |                                                                  |           |                                   |                  | assessment (n=123);     |                       |
| 4  |                              |                                                                  |           |                                   |                  | interviews (n=73)       |                       |
| 5  | Reproductive health          | Building Reproductive                                            | Western   | Health care providers             | Mixed methods    | Interviews,             | Descriptive; thematic |
| 6  | research                     | health Research and Audit                                        | Pacific   |                                   |                  | questionnaires, focus   |                       |
| 7  |                              |                                                                  |           |                                   |                  | group discussions;      |                       |
| 8  |                              | Capacity and Activity in the                                     |           |                                   |                  | online survey (n=28)    |                       |
| 9  |                              | Pacific Islands (BRRACAP)                                        |           |                                   |                  | Delphi survey (n=30);   | Descriptive; thematic |
| 10 | Oral health research         | N.A.                                                             | Africa    | National and regional level       | Mixed methods    | literature review       |                       |
| 11 |                              |                                                                  |           |                                   |                  | Interviews (n=7); focus | Thematic              |
| 12 | Informing and directing      | N.A.                                                             | Africa    | Multiple institutions involved in | Qualitative      | group discussions       |                       |
| 13 | capacity strengthening       |                                                                  |           | research (research institute,     |                  | (n=3)                   |                       |
| 14 | initiatives                  |                                                                  |           | university, NGO, hospital)        |                  |                         |                       |
| 15 | Health systems policy and    | CHEPSAA                                                          | Africa    | Universities                      | Mixed methods    | Document reviews;       | Thematic              |
| 16 | systems research and         |                                                                  |           |                                   |                  | interviews; surveys     |                       |
| 17 | analysis                     |                                                                  |           |                                   |                  |                         |                       |
| 18 | Social Determinants of       | INDEPTH Training and                                             | Africa    | Universities (Schools of Public   | Qualitative      | Document reviews;       | Thematic              |
| 19 | Health and health equity     | research centres of                                              |           | Health)                           |                  | interviews (n=30),      |                       |
| 20 |                              | Excellence (INTREC)                                              |           |                                   |                  | online searches         |                       |
| 21 | Training, research, funding, | N.A.                                                             | Africa    | Regional level                    | Qualitative      | Interviews (n=10);      | Descriptive; thematic |
| 22 | human resources              |                                                                  |           |                                   |                  | literature review       |                       |
| 23 | Cohort studies               | World Cohort Integration                                         | Global    | Regional level                    | Mixed methods    | Survey (n=42); FGDs     | Descriptive; thematic |
| 24 |                              | Workshop                                                         |           |                                   |                  | (n=1)                   |                       |
| 25 |                              |                                                                  |           |                                   |                  |                         |                       |
| 26 | Stewardship, capacity        | N.A.                                                             | Eastern   | Universities                      | Cross-sectional; | Survey                  | Descriptive           |
| 27 | building, knowledge          |                                                                  | Mediterra |                                   | quantitative     |                         |                       |
| 28 | production                   |                                                                  | nean      |                                   |                  |                         |                       |
| 29 | Critical mass of             | N.A.                                                             | Africa    | Institute involved in research    | Cross-sectional; | Document review;        | Descriptive; thematic |
| 30 | multidisciplinary research   |                                                                  |           |                                   | mixed-methods    | interviews (n=78)       |                       |
| 31 | scientists                   |                                                                  |           |                                   |                  |                         |                       |
| 32 | Equity in access to health   | N.A.                                                             | Global    | Regional level                    | Qualitative      | Review of health        | Descriptive           |
| 33 | research capacity            |                                                                  |           |                                   |                  | journals (n=37)         |                       |
| 34 | development                  |                                                                  |           |                                   |                  |                         |                       |
| 35 | Effective mentoring          | N.A.                                                             | Africa    | University                        | Qualitative      | Survey (n=22)           | Thematic              |
| 36 |                              |                                                                  |           |                                   |                  |                         |                       |
| 37 |                              |                                                                  |           |                                   |                  |                         |                       |
| 38 |                              |                                                                  |           |                                   |                  |                         |                       |
| 39 |                              |                                                                  |           |                                   |                  |                         |                       |
| 40 |                              |                                                                  |           |                                   |                  |                         |                       |
| 41 |                              |                                                                  |           |                                   |                  |                         |                       |
| 42 |                              |                                                                  |           |                                   |                  |                         |                       |
| 43 |                              |                                                                  |           |                                   |                  |                         |                       |
| 44 |                              |                                                                  |           |                                   |                  |                         |                       |
| 45 |                              |                                                                  |           |                                   |                  |                         |                       |
| 46 |                              |                                                                  |           |                                   |                  |                         |                       |
| 47 |                              |                                                                  |           |                                   |                  |                         |                       |

|    |                                                                   |                                        |                       |                                                                                   |               |                                                                            |                       |
|----|-------------------------------------------------------------------|----------------------------------------|-----------------------|-----------------------------------------------------------------------------------|---------------|----------------------------------------------------------------------------|-----------------------|
| 1  |                                                                   |                                        |                       |                                                                                   |               |                                                                            |                       |
| 2  | Public health nutrition                                           | N.A.                                   | Africa                | Multiple institutions involved in research (research institutes and universities) | Mixed methods | Document review; survey (n=15); consultations; interviews; websites review | Descriptive; thematic |
| 3  |                                                                   |                                        |                       |                                                                                   |               |                                                                            |                       |
| 4  |                                                                   |                                        |                       |                                                                                   |               |                                                                            |                       |
| 5  |                                                                   |                                        |                       |                                                                                   |               |                                                                            |                       |
| 6  |                                                                   |                                        |                       |                                                                                   |               |                                                                            |                       |
| 7  |                                                                   |                                        |                       |                                                                                   |               |                                                                            |                       |
| 8  | Equitable research agenda                                         | N.A.                                   | Western Pacific       | National level                                                                    | Qualitative   | Literature review (n=218); focus group (n=1)                               | Descriptive           |
| 9  |                                                                   |                                        |                       |                                                                                   |               |                                                                            |                       |
| 10 |                                                                   |                                        |                       |                                                                                   |               |                                                                            |                       |
| 11 | Capacity building programmes for effective ethic review processes | African Malaria Network Trust (AMANET) | Africa                | Ethic committees (national, institutional level)                                  | Quantitative  | Survey (n=312)                                                             | Descriptive           |
| 12 |                                                                   |                                        |                       |                                                                                   |               |                                                                            |                       |
| 13 |                                                                   |                                        |                       |                                                                                   |               |                                                                            |                       |
| 14 | Capacity building programmes for effective ethic review processes | N.A.                                   | Eastern Mediterranean | Multiple institutions involved in research (universities and research institutes) | Quantitative  | Bibliometric assay                                                         | Descriptive           |
| 15 |                                                                   |                                        |                       |                                                                                   |               |                                                                            |                       |
| 16 | Biomedical research                                               | N.A.                                   | Africa                | Ethic committees (national level)                                                 | Mixed methods | Interviews; survey (n=12)                                                  | Descriptive; thematic |
| 17 |                                                                   |                                        |                       |                                                                                   |               |                                                                            |                       |
| 18 |                                                                   |                                        |                       |                                                                                   |               |                                                                            |                       |
| 19 |                                                                   |                                        |                       |                                                                                   |               |                                                                            |                       |
| 20 |                                                                   |                                        |                       |                                                                                   |               |                                                                            |                       |
| 21 |                                                                   |                                        |                       |                                                                                   |               |                                                                            |                       |
| 22 | Publication bias                                                  | N.A.                                   | Global                | Regional level                                                                    | Quantitative  | Number of manuscripts submitted to 8 journals                              | Descriptive           |
| 23 |                                                                   |                                        |                       |                                                                                   |               |                                                                            |                       |
| 24 |                                                                   |                                        |                       |                                                                                   |               |                                                                            |                       |
| 25 |                                                                   |                                        |                       |                                                                                   |               |                                                                            |                       |
| 26 | Health priorities and research capacity in Fiji                   | N.A.                                   | Western Pacific       | Regional level                                                                    | Mixed methods | Literature review (298 papers included); interviews                        | Descriptive; thematic |
| 27 |                                                                   |                                        |                       |                                                                                   |               |                                                                            |                       |
| 28 |                                                                   |                                        |                       |                                                                                   |               |                                                                            |                       |
| 29 |                                                                   |                                        |                       |                                                                                   |               |                                                                            |                       |
| 30 |                                                                   |                                        |                       |                                                                                   |               |                                                                            |                       |
| 31 |                                                                   |                                        |                       |                                                                                   |               |                                                                            |                       |
| 32 |                                                                   |                                        |                       |                                                                                   |               |                                                                            |                       |
| 33 |                                                                   |                                        |                       |                                                                                   |               |                                                                            |                       |
| 34 |                                                                   |                                        |                       |                                                                                   |               |                                                                            |                       |
| 35 |                                                                   |                                        |                       |                                                                                   |               |                                                                            |                       |
| 36 |                                                                   |                                        |                       |                                                                                   |               |                                                                            |                       |
| 37 |                                                                   |                                        |                       |                                                                                   |               |                                                                            |                       |
| 38 |                                                                   |                                        |                       |                                                                                   |               |                                                                            |                       |
| 39 |                                                                   |                                        |                       |                                                                                   |               |                                                                            |                       |
| 40 |                                                                   |                                        |                       |                                                                                   |               |                                                                            |                       |
| 41 |                                                                   |                                        |                       |                                                                                   |               |                                                                            |                       |
| 42 |                                                                   |                                        |                       |                                                                                   |               |                                                                            |                       |
| 43 |                                                                   |                                        |                       |                                                                                   |               |                                                                            |                       |
| 44 |                                                                   |                                        |                       |                                                                                   |               |                                                                            |                       |
| 45 |                                                                   |                                        |                       |                                                                                   |               |                                                                            |                       |
| 46 |                                                                   |                                        |                       |                                                                                   |               |                                                                            |                       |
| 47 |                                                                   |                                        |                       |                                                                                   |               |                                                                            |                       |

Table S3. Supplementary and detailed data for 'HRCS methods for implementation' original research publications

| Publication  |      | Publication Characteristics |                        |                 | Programme Characteristics                                                                                |        |               |
|--------------|------|-----------------------------|------------------------|-----------------|----------------------------------------------------------------------------------------------------------|--------|---------------|
| Author       | Year | LMIC Authorship             | Capacity Term          | HRCS Definition | Focus                                                                                                    | Region | Study Design  |
| Murphy et al | 2015 | Co-author                   | Capacity Development   | No              | Partner assessment toolkit (PAT) to discuss partnership ethics and put accountability measures in place. | Global | Qualitative   |
| Le et al     | 2014 | Co-author                   | Capacity Strengthening | No              | Strengthening capacity for health policy and systems research and analysis (HPSR+A) in Universities.     | Africa | Mixed Methods |
| Huber et al  | 2014 | Co-author                   | Capacity Strengthening | Yes             | Training evaluation for training related to HRCS.                                                        | Africa | Quantitative  |

|    |               |                |                        |     |                                                                                                                                         |        |             |
|----|---------------|----------------|------------------------|-----|-----------------------------------------------------------------------------------------------------------------------------------------|--------|-------------|
| 1  |               |                |                        |     |                                                                                                                                         |        |             |
| 2  |               |                |                        |     |                                                                                                                                         |        |             |
| 3  |               |                |                        |     |                                                                                                                                         |        |             |
| 4  |               |                |                        |     |                                                                                                                                         |        |             |
| 5  |               |                |                        |     |                                                                                                                                         |        |             |
| 6  |               |                |                        |     |                                                                                                                                         |        |             |
| 7  |               |                |                        |     |                                                                                                                                         |        |             |
| 8  | Jessani et al | 2014 Co-author | Capacity Development   | No  | Capacity assessment tool for schools of public health to reflect on institutional strengths and weaknesses for health systems research. | Africa | Qualitative |
| 9  |               |                |                        |     |                                                                                                                                         |        |             |
| 10 |               |                |                        |     |                                                                                                                                         |        |             |
| 11 |               |                |                        |     |                                                                                                                                         |        |             |
| 12 |               |                |                        |     |                                                                                                                                         |        |             |
| 13 |               |                |                        |     |                                                                                                                                         |        |             |
| 14 |               |                |                        |     |                                                                                                                                         |        |             |
| 15 |               |                |                        |     |                                                                                                                                         |        |             |
| 16 |               |                |                        |     |                                                                                                                                         |        |             |
| 17 |               |                |                        |     |                                                                                                                                         |        |             |
| 18 |               |                |                        |     |                                                                                                                                         |        |             |
| 19 |               |                |                        |     |                                                                                                                                         |        |             |
| 20 | Bates et al   | 2014 Nil       | Capacity Strengthening | Yes | Development of a practical approach for the design and evaluation of health capacity strengthening programmes.                          | Africa | Qualitative |
| 21 |               |                |                        |     |                                                                                                                                         |        |             |
| 22 |               |                |                        |     |                                                                                                                                         |        |             |
| 23 |               |                |                        |     |                                                                                                                                         |        |             |
| 24 |               |                |                        |     |                                                                                                                                         |        |             |
| 25 |               |                |                        |     |                                                                                                                                         |        |             |
| 26 |               |                |                        |     |                                                                                                                                         |        |             |
| 27 |               |                |                        |     |                                                                                                                                         |        |             |
| 28 |               |                |                        |     |                                                                                                                                         |        |             |
| 29 |               |                |                        |     |                                                                                                                                         |        |             |
| 30 |               |                |                        |     |                                                                                                                                         |        |             |
| 31 | Birch et al   | 2013 Co-author | Capacity Building      | No  | North-South clinical nursing partnership for CS.                                                                                        | Africa | Qualitative |
| 32 |               |                |                        |     |                                                                                                                                         |        |             |
| 33 |               |                |                        |     |                                                                                                                                         |        |             |
| 34 |               |                |                        |     |                                                                                                                                         |        |             |
| 35 |               |                |                        |     |                                                                                                                                         |        |             |
| 36 |               |                |                        |     |                                                                                                                                         |        |             |
| 37 |               |                |                        |     |                                                                                                                                         |        |             |
| 38 |               |                |                        |     |                                                                                                                                         |        |             |
| 39 |               |                |                        |     |                                                                                                                                         |        |             |
| 40 |               |                |                        |     |                                                                                                                                         |        |             |
| 41 |               |                |                        |     |                                                                                                                                         |        |             |
| 42 |               |                |                        |     |                                                                                                                                         |        |             |
| 43 |               |                |                        |     |                                                                                                                                         |        |             |
| 44 |               |                |                        |     |                                                                                                                                         |        |             |
| 45 |               |                |                        |     |                                                                                                                                         |        |             |
| 46 |               |                |                        |     |                                                                                                                                         |        |             |
| 47 |               |                |                        |     |                                                                                                                                         |        |             |



1  
2  
3  
4  
5  
6  
7  
8  
9  
10  
11  
12  
13  
14  
15  
16  
17  
18  
19  
20  
21  
22  
23  
24  
25  
26  
27  
28  
29  
30  
31  
32  
33  
34  
35  
36  
37  
38  
39  
40  
41  
42  
43  
44  
45  
46  
47

|             |           |                   |     |                                                                                                                                             |        |             |
|-------------|-----------|-------------------|-----|---------------------------------------------------------------------------------------------------------------------------------------------|--------|-------------|
| Bates et al | 2006 Last | Capacity Building | Yes | Evidence based tool to determine infrastructural capabilities and design and evaluation of capacity building programmes in health research. | Africa | Qualitative |
|-------------|-----------|-------------------|-----|---------------------------------------------------------------------------------------------------------------------------------------------|--------|-------------|

For peer review only

| Data Collection                                                        | Data Analysis            | Steps in HRCS Process                                                                                                                                                                                                                                                                                                                                                                            | Methods Used in Process                                                                                                                                                                                |
|------------------------------------------------------------------------|--------------------------|--------------------------------------------------------------------------------------------------------------------------------------------------------------------------------------------------------------------------------------------------------------------------------------------------------------------------------------------------------------------------------------------------|--------------------------------------------------------------------------------------------------------------------------------------------------------------------------------------------------------|
| Stakeholder workshops situated around case studies and briefing papers | Thematic                 | <ol style="list-style-type: none"> <li>1. Common understanding of PAT components developed through workshops with sub-Saharan African partners.</li> <li>2. PAT modified by expert team and circulated to partners in all country contexts for comment.</li> <li>3. PAT finalised and tested in existing partnership.</li> </ol>                                                                 | <p>Qualitative joint self-assessment.<br/>Phased/developmental approach.</p> <p>Standardised</p>                                                                                                       |
| FGD, IDI, Stakeholder workshop, survey, document review                | Thematic and Descriptive | <ol style="list-style-type: none"> <li>1. Develop shared understanding of capacity and CS across consortium.</li> <li>2. Map contextual environment for HPSR+A, including desk review, and key informant interviews/discussions.</li> <li>3. Self-assessment against core thematic areas identified.</li> <li>4. Comparative synthesis by UK partner and cross-consortium comparison.</li> </ol> | <p>Mixed-method self-assessment by African partners and 'external' assessment by UK partner.</p> <p>Phased/developmental approach.</p> <p>'Semi-standardised' to allow for flexibility in context.</p> |
| Survey                                                                 | Inferential              | <ol style="list-style-type: none"> <li>1. Domains for evaluation selected based on existing framework.</li> <li>2. Development of questionnaire.</li> <li>3. Testing of questionnaire.</li> <li>4. Validation of questionnaire.</li> </ol>                                                                                                                                                       | <p>Quantitative self-survey.</p> <p>Fixed-point.</p> <p>Standardised</p>                                                                                                                               |

1  
2  
3  
4  
5  
6  
7  
8  
9  
10  
11  
12  
13  
14  
15  
16  
17  
18  
19  
20  
21  
22  
23  
24  
25  
26  
27  
28  
29  
30  
31  
32  
33  
34  
35  
36  
37  
38  
39  
40  
41  
42  
43  
44  
45  
46  
47

Quantitative self-assessment.

Qualitative institutional profiling and priority identification.

Phased/developmental.

'Semi-standardised' to allow for flexibility in context.

Mixed-method joint assessment and priority identification.

Phased/developmental.

'Semi-standardised' to allow for flexibility in context.

Mixed-method self-assessment.

Phased/developmental.

Standardised.

Stakeholder workshop      Thematic

1. Capacity assessment questions based on previous instruments but adapted for focus.
2. Meeting with capacity focal points at universities to be assessed to refine tool to context.
3. Implementation of tool.
4. Dissemination and reflection on findings to develop capacity strengthening plan in workshop.

Review and case studies      Thematic

1. Establish goal of capacity strengthening programme
2. Describing ideal capacity to achieve goal- synthesis of relevant evidence
3. Determination of existing capacity against 'ideal' identified in step 2.
4. Devise and implement an action plan to fill gaps.
5. Learn through doing and adapt the action plan regularly.

Review      Thematic

1. Systematic literature search for partnership measures.
2. Screening of partnership measures for applicability.
3. Selection and modification of existing appropriate measure.
4. Piloting of measure.

1  
2  
3  
4  
5  
6  
7  
8  
9  
10  
11  
12  
13  
14  
15  
16  
17  
18  
19  
20  
21  
22  
23  
24  
25  
26  
27  
28  
29  
30  
31  
32  
33  
34  
35  
36  
37  
38  
39  
40  
41  
42  
43  
44  
45  
46  
47

Review

Thematic

1. Literature search for existing tools and models
2. Using best practice examples to design the evaluation programme
3. Develop and adapt an evaluation tool (links to QA cycle):  
define institutional systems needed to support research;  
enumerate existing and missing resources; address identified gaps.

Qualitative self-assessment and priority identification.

Phased/developmental

'Semi-standardised' to allow for flexibility in context.

For peer review only

**Table S4. Supplementary and detailed data for 'Evidence synthesis for RCS implementation and evaluation' original research publications**

| Publication   |      | Publication Characteristics |                        |                 | Programme Characteristics                                                                                                                                                                 |
|---------------|------|-----------------------------|------------------------|-----------------|-------------------------------------------------------------------------------------------------------------------------------------------------------------------------------------------|
| Author        | Year | LMIC Authorship             | Capacity Term          | HRCS Definition | Focus                                                                                                                                                                                     |
| Bates et al   | 2015 | Nil                         | Capacity Strengthening | No              | Enhance understanding in difficulties of evaluating health research capacity strengthening and make recommendations for improvement                                                       |
| Cole et al    | 2014 | Nil                         | Capacity Strengthening | Yes             | Describe the design of health research capacity strengthening evaluations, indicators, outputs and outcomes.                                                                              |
| Boyd et al    | 2013 | Nil                         | Capacity Strengthening | No              | Describe and compare key characteristics of existing health research capacity strengthening evaluation frameworks                                                                         |
| Gadsby        | 2011 | Nil                         | Capacity Strengthening | Yes             | Understand the way in which research capacity strengthening is understood and approached through examination of methods for monitoring and evaluation of research capacity strengthening. |
| Edwards et al | 2009 | Co-author                   | Capacity Building      | No              | Identification of factors that have influenced research capacity development amongst nurses in LMICs.                                                                                     |

---

| Region | Study Design  | Data Collection                                                  | Data Analysis | Participants/Target Group                             |
|--------|---------------|------------------------------------------------------------------|---------------|-------------------------------------------------------|
| Global | Qualitative   | Informal discussion and review                                   | Thematic      | HRCS Funders, evaluators and implementers             |
| Global | Qualitative   | Review                                                           | Thematic      | LMIC Health Research Funders                          |
| Global | Mixed methods | telephone discusion, stakeholder meetings, online survey, review | Thematic      | HRCS Funders, evaluators and implementers             |
| Global | Qualitative   | Review, informal discussions, semi-structured interview          | Thematic      | Donor Organisations and Experts in HRCS               |
| Global | Qualitative   | Review, informal interviews/discussions                          | Thematic      | Senior Nurse Leaders (HRCS Intervention Target Group) |

1  
2  
3  
4  
5  
6  
7  
8  
9  
10  
11  
12  
13  
14  
15  
16  
17  
18  
19  
20  
21  
22  
23  
24  
25  
26  
27  
28  
29  
30  
31  
32  
33  
34  
35  
36  
37  
38  
39  
40  
41  
42  
43  
44  
45  
46  
47

**Table S5. Supplementary and detailed data for 'miscellaneous' publications**

| <b>Publication</b> |      | <b>Publication Characteristics</b> |                        |                 |
|--------------------|------|------------------------------------|------------------------|-----------------|
| Author             | Year | LMIC Authorship                    | Capacity Term          | HRCS Definition |
| Cole et al         | 2016 | Last, co-author                    | Capacity Strengthening | No              |
| Parker & Kingori   | 2016 | Nil                                | Capacity Building      | No              |
| Muldoon et al      | 2012 | Co-author                          | Capacity Building      | No              |
| Nurse & Wight      | 2011 | First                              | Capacity Strengthening | Yes             |

For peer review only

| Aim                                                                                                                                                                         | Region | Study Design  | Data Collection          | Data Analysis |
|-----------------------------------------------------------------------------------------------------------------------------------------------------------------------------|--------|---------------|--------------------------|---------------|
| Mixed methods examination of mentorship experiences in Global Health                                                                                                        | Global | Mixed methods | Document review; case    | Thematic      |
| Qualitative examination of researcher's views on good and bad international research collaborations                                                                         | Global | Qualitative   | Interviews (n=22)        | Thematic      |
| Documenting North-South research collaborations and provide insights into ongoing benefits and challenges of engaging in the research process from the Southern perspective | Africa | Mixed methods | Surveys (n=19), Intervie | Thematic      |
| Analysing the political economy of health research commissioning among bilateral, multilateral, non-governmental and philanthropic organisations                            | Africa | Qualitative   | Document review; inte    | Thematic      |



Table S6. Supplementary and detailed data for 'Perspective, Opinion &amp; Commentary' publications

| Publication             |      | Publication Characteristics |                        |                 |
|-------------------------|------|-----------------------------|------------------------|-----------------|
| Author                  | Year | LMIC Authorship             | Capacity Term          | HRCS Definition |
| Airhihenbuwa et al      | 2016 | Nil                         | Capacity Building      | No              |
| Bloomfield et al        | 2016 | Last, co-author             | Capacity Building      | No              |
| Hyder et al             | 2016 | Last, co-author             | Capacity Strengthening | No              |
| Hawkes et al            | 2016 | Co-author                   | Capacity Strengthening | No              |
| Winchester et al        | 2016 | Co-author                   | Capacity Building      | No              |
| Dossou et al            | 2016 | First, co-author            | Capacity Strengthening | No              |
| Cubaka et al            | 2016 | First, co-author            | Capacity Building      | No              |
| Davies & Mullen         | 2016 | Nil                         | Capacity Building      | No              |
| Bloomfield et al        | 2016 | Nil                         | Capacity Building      | No              |
| Sturke et al            | 2016 | Nil                         | Capacity Building      | Yes             |
| Atkins et al            | 2016 | Last, co-author             | Capacity Building      | No              |
| Osanjo et al            | 2016 | First, co-author, last      | Capacity Building      | No              |
| Atkins et al            | 2016 | Co-author                   | Capacity Building      | No              |
| O'Connor et al          | 2016 | Co-author                   | Capacity Building      | No              |
| Berman et al            | 2015 | First, co-author, last      | Capacity Building      | No              |
| Cash-Gibson et al       | 2015 | Last, co-author             | Capacity Building      | Yes             |
| Koso-Thomas et al       | 2015 | Last                        | Capacity Building      | No              |
| MacLaren et al          | 2015 | Co-author                   | Capacity Building      | No              |
| Langlois et al          | 2015 | Co-author                   | Capacity Strengthening | No              |
| Miranda et al           | 2015 | First, co-author, last      | Capacity Building      | No              |
| Adanu et al             | 2015 | First, co-author            | Capacity Strengthening | No              |
| Cottler et al           | 2015 | Co-author                   | Capacity Building      | Yes             |
| McGregor et al          | 2015 | Nil                         | Capacity Building      | No              |
| Kombe                   | 2015 | First, co-author, last      | Capacity Strengthening | No              |
| Anderson et al          | 2014 | Last, co-author             | Capacity Building      | No              |
| Hanney & Gonzalez-Block | 2014 | Last (2)                    | Capacity Building      | No              |
| Cole et al              | 2014 | Nil                         | Capacity Strengthening | No              |
| Kabiru et al            | 2014 | First, co-author, last      | Capacity Building      | No              |
| Chu et al               | 2014 | Last, co-author             | Capacity Building      | No              |
| Sweetland et al         | 2014 | Co-author                   | Capacity Building      | No              |
| Adedokun et al          | 2014 | First, co-author, last      | Capacity Building      | No              |
| Harries et al           | 2014 | Co-author                   | Capacity Building      | No              |
| Carothers et al         | 2014 | Nil                         | Capacity Building      | No              |
| Klinkenberg et al       | 2014 | Last, co-author             | Capacity Building      | No              |
| Mandala et al           | 2014 | First, co-author, last      | Capacity Strengthening | No              |

|    |                        |      |                        |                        |     |
|----|------------------------|------|------------------------|------------------------|-----|
| 1  |                        |      |                        |                        |     |
| 2  | Ramsay et al           | 2014 | Co-author              | Capacity Building      | No  |
| 3  | Pratt & Loff           | 2013 | Nil                    | Capacity Strengthening | No  |
| 4  | Noormahomed et al      | 2013 | First, co-author, last | Capacity Strengthening | No  |
| 5  | Sanchez et al          | 2013 | Last, co-author        | Capacity Strengthening | No  |
| 6  | Sanchez et al          | 2013 | Last, co-author        | Capacity Strengthening | No  |
| 7  | Shaji                  | 2013 | First (1)              | Capacity Building      | No  |
| 8  | Ekeroma                | 2013 | Nil                    | Capacity Building      | No  |
| 9  | Vasquez et al          | 2013 | Last, co-author        | Capacity Strengthening | Yes |
| 10 | Osei-Atweneboana et al | 2012 | First, co-author       | Capacity Building      | Yes |
| 11 | Ijsselmuiden et al     | 2012 | First, co-author, last | Capacity Strengthening | Yes |
| 12 | Mckee et al            | 2012 | Nil                    | Capacity Building      | No  |
| 13 | Nwaka et al            | 2012 | First, co-author, last | Capacity Building      | No  |
| 14 | Kasonde & Campbell     | 2012 | First                  | Capacity Building      | No  |
| 15 | Thornicroft et al      | 2012 | Last, co-author        | Capacity Building      | Yes |
| 16 | Pratt & Loff           | 2012 | Nil                    | Capacity Strengthening | No  |
| 17 | de-graft Aikins et al  | 2012 | First, co-author       | Capacity Building      | No  |
| 18 | Greenwood et al        | 2012 | Nil                    | Capacity Development   | No  |
| 19 | Airhihenbuwa et al     | 2011 | Last, co-author        | Capacity Building      | Yes |
| 20 | Farquhar et al         | 2011 | Last                   | Capacity Building      | No  |
| 21 | Forde et al            | 2011 | Last, co-author        | Capacity Development   | No  |
| 22 | Laabes et al           | 2011 | First, co-author       | Capacity Building      | No  |
| 23 | Kariuki et al          | 2011 | First, co-author       | Capacity Building      | No  |
| 24 | Pinto et al            | 2011 | Co-author              | Capacity Building      | No  |
| 25 | Wilson et al           | 2011 | Last                   | Capacity Building      | No  |
| 26 | Manabe et al           | 2011 | First, co-author, last | Capacity Building      | Yes |
| 27 | Gezmu et al            | 2011 | Co-author              | Capacity Building      | No  |
| 28 | Brown et al            | 2010 | First, co-author, last | Capacity Development   | No  |
| 29 | Kabiru et al           | 2010 | First, co-author, last | Capacity Development   | Yes |
| 30 | Ezeh et al             | 2010 | First, co-author, last | Capacity Building      | Yes |
| 31 | Lazarus et al          | 2010 | Last                   | Capacity Development   | No  |
| 32 | Kutcher et al          | 2010 | Last, co-author        | Capacity Building      | No  |
| 33 | Maher et al            | 2010 | First, co-author, last | Capacity Strengthening | No  |
| 34 | Ntoumi                 | 2010 | First (1)              | Capacity Building      | No  |
| 35 | Zumla et al            | 2010 | First, co-author, last | Capacity Development   | No  |
| 36 | Kilama                 | 2009 | First (1)              | Capacity Building      | Yes |
| 37 | Kilama                 | 2009 | First (1)              | Capacity Building      | No  |
| 38 | Coloma & Harris        | 2009 | Nil                    | Capacity Building      | No  |
| 39 | Hussein                | 2008 | First (1)              | Capacity Building      | No  |
| 40 | Kumar et al            | 2008 | First, co-author, last | Capacity Building      | No  |
| 41 | Malomo et al           | 2008 | First, co-author, last | Capacity Building      | No  |
| 42 |                        |      |                        |                        |     |
| 43 |                        |      |                        |                        |     |
| 44 |                        |      |                        |                        |     |
| 45 |                        |      |                        |                        |     |
| 46 |                        |      |                        |                        |     |
| 47 |                        |      |                        |                        |     |

|    |                     |      |                        |                        |     |
|----|---------------------|------|------------------------|------------------------|-----|
| 1  |                     |      |                        |                        |     |
| 2  | Sheikh              | 2008 | First (1)              | Capacity Building      | No  |
| 3  | Tindana & Boateng   | 2008 | First, last (2)        | Capacity Building      | No  |
| 4  | Upshar              | 2008 | Nil (1)                | Capacity Building      | No  |
| 5  | Whitworth et al     | 2008 | Last, co-author        | Capacity Strengthening | No  |
| 6  | Schulz-Baldes et al | 2007 | Nil                    | Capacity Building      | No  |
| 7  | Nuyens              | 2007 | Nil                    | Capacity Strengthening | Yes |
| 8  | Stillman et al      | 2006 | Co-author              | Capacity Building      | No  |
| 9  | Goto et al          | 2005 | First, co-author, last | Capacity Building      | No  |
| 10 | Andruchow et al     | 2004 | Nil                    | Capacity Building      | No  |
| 11 | Lansang & Dennis    | 2004 | First,last (2)         | Capacity Building      | Yes |
| 12 | Reddy et al         | 2002 | First, last            | Capacity Building      | Yes |
| 13 | Varkevisser et al   | 2001 | Nil                    | Capacity Building      | No  |
| 14 | Nchinda             | 2002 | Nil                    | Capacity Strengthening | Yes |
| 15 |                     |      |                        |                        |     |
| 16 |                     |      |                        |                        |     |
| 17 |                     |      |                        |                        |     |
| 18 |                     |      |                        |                        |     |
| 19 |                     |      |                        |                        |     |
| 20 |                     |      |                        |                        |     |
| 21 |                     |      |                        |                        |     |
| 22 |                     |      |                        |                        |     |
| 23 |                     |      |                        |                        |     |
| 24 |                     |      |                        |                        |     |
| 25 |                     |      |                        |                        |     |
| 26 |                     |      |                        |                        |     |
| 27 |                     |      |                        |                        |     |
| 28 |                     |      |                        |                        |     |
| 29 |                     |      |                        |                        |     |
| 30 |                     |      |                        |                        |     |
| 31 |                     |      |                        |                        |     |
| 32 |                     |      |                        |                        |     |
| 33 |                     |      |                        |                        |     |
| 34 |                     |      |                        |                        |     |
| 35 |                     |      |                        |                        |     |
| 36 |                     |      |                        |                        |     |
| 37 |                     |      |                        |                        |     |
| 38 |                     |      |                        |                        |     |
| 39 |                     |      |                        |                        |     |
| 40 |                     |      |                        |                        |     |
| 41 |                     |      |                        |                        |     |
| 42 |                     |      |                        |                        |     |
| 43 |                     |      |                        |                        |     |
| 44 |                     |      |                        |                        |     |
| 45 |                     |      |                        |                        |     |
| 46 |                     |      |                        |                        |     |
| 47 |                     |      |                        |                        |     |

---

**Commentary Content**

| HRCS Focus                                                                    | Commentary Purpose                                        | Commentary Informed By        |
|-------------------------------------------------------------------------------|-----------------------------------------------------------|-------------------------------|
| HRCS leadership development                                                   | Recommendations                                           | Experience                    |
| Global health centres of excellence training programme                        | Programme outputs; lessons learned                        | Experience (single programme) |
| Road traffic injuries research network                                        | Programme description; programme outputs                  | Experience (single programme) |
| Capacity development for evidence uptake                                      | Lessons learned                                           | Experience; review            |
| Development of a global health network                                        | Programme description; lessons learned                    | Experience (single programme) |
| Implementing a sexual and reproductive health network in Africa               | Programme description; lessons learned                    | Experience (single programme) |
| Twinning' model for PhD students                                              | Programme description; lessons learned                    | Experience (single programme) |
| HRCS funding for Africa                                                       | Advocacy                                                  | Experience (single programme) |
| Capacity building in Global Health research                                   | Lessons learned                                           | Experience (single programme) |
| NIH International Tobacco and Health Research and Capacity Building Programme | Programme description; lessons learned                    | Experience (single programme) |
| Online journal clubs for student mentoring                                    | Programme description; lessons learned                    | Experience (single programme) |
| Implementation science research training fellowship                           | programme description; programme outputs; lessons learned | Experience (single programme) |
| Africa/Asian Regional Capacity Development programme                          | Programme description; lessons learned                    | Experience (single programme) |
| capacity development in nursing informatics                                   | Programme description; lessons learned                    | Experience (single programme) |
| Development of a knowledge translation platform                               | Lessons learned                                           | Experience (single programme) |
| Sth-Nth-Sth research collaboration network                                    | Lessons learned                                           | Experience (single programme) |
| Global network for women and children's health research                       | Programme outputs; lessons learned                        | Experience (single programme) |
| Introduction to health research workshop                                      | Lessons learned                                           | Experience (single programme) |
| Health systems research synthesis in LMICs                                    | Programme description                                     | Experience (single programme) |
| Translational research in NCDs                                                | Programme description                                     | Experience (single programme) |
| HRCS in sexual and reproductive health in Africa                              | Recommendations                                           | Workshops                     |
| HRCS for brain and nervous system disorders research                          | Recommendations                                           | Experience; review            |
| Bibliometric analysis of authorship HIV treatment/prevention publications     | Analysis of LMIC authorship                               | Review                        |
| Field worker capacity strengthening in Africa                                 | Recommendations                                           | Workshops                     |
| Creating a charter of collaboration for HRCS partnerships                     | Process description                                       | Experience (single programme) |
| Building health research systems                                              | Situation analysis                                        | Review                        |
| HRCS evaluation approaches                                                    | Recommendations                                           | Review                        |
| African doctoral dissertation research fellowships                            | Programme outputs; lessons learned                        | Experience (single programme) |
| HRCS in Africa                                                                | Recommendations                                           | Not stated                    |
| Mental health research capacity in Mozambique                                 | Programme description                                     | Experience (single programme) |
| Consortium for advanced research training in Africa                           | Programme outputs; lessons learned                        | Experience (single programme) |
| Mentorship for operational research capacity building                         | Lessons learned                                           | Experience (single programme) |
| FIC clinical research scholars and fellows programme                          | Lessons learned                                           | Experience (single programme) |
| Ethiopian operational research initiative                                     | Programme outputs; lessons learned                        | Experience (single programme) |
| Southern Africa consortium for research excellence                            | Programme description                                     | Experience (single programme) |

|    |                                                                         |                                                        |                                       |
|----|-------------------------------------------------------------------------|--------------------------------------------------------|---------------------------------------|
| 1  |                                                                         |                                                        |                                       |
| 2  | Operational research training initiative                                | Programme outputs; lessons learned                     | Experience (single programme)         |
| 3  | Contribution of product development partnerships to RCS                 | Programme outputs                                      | Review                                |
| 4  | Medical education partnership                                           | Programme outputs; lessons learned                     | Experience (single programme)         |
| 5  | Multi-faceted Nth-Sth HRCS project                                      | Programme description                                  | Experience (single programme)         |
| 6  | Multi-faceted Nth-Sth HRCS project                                      | Lessons learned                                        | Experience (single programme)         |
| 7  | HRCS in mental health research                                          | Recommendations                                        | Not stated                            |
| 8  | Building reproductive health research and audit capacity in the Pacific | Programme description                                  | Experience (single programme)         |
| 9  | HRCS                                                                    | Recommendations                                        | Experience (single programme); review |
| 10 | HRCS for helminthiasis control                                          | Recommendations                                        | Experience                            |
| 11 | Developing human resources for health research                          | Recommendations                                        | Review                                |
| 12 | HRCS in LMICs                                                           | Recommendations                                        | Review                                |
| 13 | Identification of centres of excellence in health innovation in Africa  | Programme description                                  | Experience (single programme)         |
| 14 | Creating a knowledge translation platform in Zambia                     | Lessons learned                                        | Experience (single programme)         |
| 15 | HRCS in global mental health research                                   | Recommendations                                        | Experience                            |
| 16 | Promotion of justice in global health research                          | Recommendations                                        | Not stated                            |
| 17 | Nth-Sth research partnership on chronic disease                         | Programme outputs; lessons learned                     | Experience (single programme)         |
| 18 | Gates malaria partnership                                               | Programme outputs; lessons learned                     | Experience (single programme)         |
| 19 | Nth-Sth RCS partnership                                                 | Lessons learned                                        | Experience (single programme)         |
| 20 | Afya-Bora consortium                                                    | Programme description                                  | Experience (single programme)         |
| 21 | Nth-Sth multi-faceted research collaboration                            | Programme outputs; lessons learned                     | Experience (single programme)         |
| 22 | HRCS for biomedical research                                            | Recommendations                                        | Not stated                            |
| 23 | HRCS for NTD control in Africa                                          | Recommendations                                        | Workshops                             |
| 24 | Development of international research partnerships                      | Lessons learned                                        | Experience (single programme)         |
| 25 | NTD collaborative teaching and learning                                 | Programme description                                  | Experience (single programme)         |
| 26 | PhD training in Africa                                                  | Programme description                                  | Experience (single programme)         |
| 27 | Strengthening biostatistics resources in Africa                         | Deliberations                                          | Workshops                             |
| 28 | Public health nutrition research and training capacity in Africa        | Deliberations                                          | Workshops                             |
| 29 | African doctoral dissertation research fellowships                      | Lessons learned                                        | Experience (single programme)         |
| 30 | Consortium for advanced research training in Africa                     | Programme description                                  | Experience (single programme)         |
| 31 | HRCS in Africa                                                          | Recommendations                                        | Experience; review                    |
| 32 | Nth-Sth clinical research development project                           | Programme outputs; programme outcomes; lessons learned | Experience (single programme)         |
| 33 | ALPHA network programme of HIV epidemiology workshops                   | Programme outputs; lessons learned                     | Experience (single programme)         |
| 34 | HRCS in Africa                                                          | Programme description(s)                               | Experience                            |
| 35 | Nth-Sth research collaboration                                          | Programme outputs; lessons learned                     | Experience (single programme)         |
| 36 | Research translation                                                    | Recommendations                                        | Not stated                            |
| 37 | HRCS in Africa                                                          | Situation analysis                                     | Review                                |
| 38 | HRCS in LMICs                                                           | Programme description                                  | Experience (single programme)         |
| 39 | FIC sponsored bioethics MHSc                                            | Lessons learned                                        | Experience (single programme)         |
| 40 | FIC sponsored bioethics MHSc                                            | Lessons learned                                        | Experience (single programme)         |
| 41 | FIC sponsored bioethics MHSc                                            | Lessons learned                                        | Experience (single programme)         |
| 42 |                                                                         |                                                        |                                       |
| 43 |                                                                         |                                                        |                                       |
| 44 |                                                                         |                                                        |                                       |
| 45 |                                                                         |                                                        |                                       |
| 46 |                                                                         |                                                        |                                       |
| 47 |                                                                         |                                                        |                                       |

|    |                                                         |                                                        |                               |
|----|---------------------------------------------------------|--------------------------------------------------------|-------------------------------|
| 1  |                                                         |                                                        |                               |
| 2  | FIC sponsored bioethics MHSc                            | Lessons learned                                        | Experience (single programme) |
| 3  | FIC sponsored bioethics MHSc                            | Lessons learned                                        | Experience (single programme) |
| 4  | FIC sponsored bioethics MHSc                            | Programme description                                  | Experience (single programme) |
| 5  | HRCS in Africa                                          | Recommendations                                        | Not stated                    |
| 6  | Benefit sharing in international health research        | Recommendations                                        | Not stated                    |
| 7  | 10 best resources for HRCS                              | Recommendations                                        | Not stated                    |
| 8  | FIC tobacco HRCS programme                              | Lessons learned                                        | Experience (single programme) |
| 9  | Reproductive health research in-service training course | Programme outputs; programme outcomes; lessons learned | Experience (single programme) |
| 10 | Cancer training and research collaboration              | Lessons learned                                        | Experience (single programme) |
| 11 | HRCS in LMICs                                           | Recommendations                                        | Review                        |
| 12 | Nth-Sth research collaboration                          | Lessons learned                                        | Experience (single programme) |
| 13 | Nth-Sth joint health systems research project           | Programme outputs; lessons learned                     | Experience (single programme) |
| 14 | HRCS in LMICs                                           | Recommendations                                        | Experience                    |
| 15 |                                                         |                                                        |                               |
| 16 |                                                         |                                                        |                               |
| 17 |                                                         |                                                        |                               |
| 18 |                                                         |                                                        |                               |
| 19 |                                                         |                                                        |                               |
| 20 |                                                         |                                                        |                               |
| 21 |                                                         |                                                        |                               |
| 22 |                                                         |                                                        |                               |
| 23 |                                                         |                                                        |                               |
| 24 |                                                         |                                                        |                               |
| 25 |                                                         |                                                        |                               |
| 26 |                                                         |                                                        |                               |
| 27 |                                                         |                                                        |                               |
| 28 |                                                         |                                                        |                               |
| 29 |                                                         |                                                        |                               |
| 30 |                                                         |                                                        |                               |
| 31 |                                                         |                                                        |                               |
| 32 |                                                         |                                                        |                               |
| 33 |                                                         |                                                        |                               |
| 34 |                                                         |                                                        |                               |
| 35 |                                                         |                                                        |                               |
| 36 |                                                         |                                                        |                               |
| 37 |                                                         |                                                        |                               |
| 38 |                                                         |                                                        |                               |
| 39 |                                                         |                                                        |                               |
| 40 |                                                         |                                                        |                               |
| 41 |                                                         |                                                        |                               |
| 42 |                                                         |                                                        |                               |
| 43 |                                                         |                                                        |                               |
| 44 |                                                         |                                                        |                               |
| 45 |                                                         |                                                        |                               |
| 46 |                                                         |                                                        |                               |
| 47 |                                                         |                                                        |                               |

Table S7. Supplementary and detailed data for 'systematic review' publications

| Publication            | Publication Characteristics |      |                        |                        |                 |                                                                                                                                               |
|------------------------|-----------------------------|------|------------------------|------------------------|-----------------|-----------------------------------------------------------------------------------------------------------------------------------------------|
|                        | Author                      | Year | LMIC Authorship        | Capacity Term          | HRCS Definition | Aim                                                                                                                                           |
| Adedokun et al         |                             | 2016 | First                  | Capacity Building      | No              | Examine author affiliations of genomic epidemiology publications                                                                              |
| Mugabo et al           |                             | 2015 | First, co-author, last | Capacity Strengthening | No              | Describe different training approaches to research capacity strengthening                                                                     |
| Huber et al            |                             | 2015 | Nil                    | Capacity Development   | No              | Support researchers and stakeholders in systemising future efforts in the HRDC field                                                          |
| Gonzalez-Block et al   |                             | 2011 | First, co-author       | Capacity Strengthening | No              | Assess the capacity of research collaborations and implementation research in strengthening networks and institutions in developing countries |
| San Sebastian & Hurtig |                             | 2006 | Nil                    | Capacity Building      | No              | Review of health research on indigenous populations in Latin America between 1995-2004                                                        |

| Region   | Searched databases                                                                                     | Search terms                                                                                                                                                                                                                                                                                                                                                                                                           | Final no. of reviewed papers |
|----------|--------------------------------------------------------------------------------------------------------|------------------------------------------------------------------------------------------------------------------------------------------------------------------------------------------------------------------------------------------------------------------------------------------------------------------------------------------------------------------------------------------------------------------------|------------------------------|
| Africa   | Humane Genome Epidemiology (HuGE) Pub                                                                  | Sub-Saharan Africa                                                                                                                                                                                                                                                                                                                                                                                                     | 508                          |
| Africa   | PubMed                                                                                                 | Capacity building; building capacity; capacity strengthening; strengthening capacity; capacity development; skills development; research; building research capacity; research training; operational research training; health; Africa                                                                                                                                                                                 | 14                           |
| Global   | PubMed; Google Scholar                                                                                 | Capacity development; research; health professuin fields; monitoting and evaluation; level of needs assessment, monitoring and evaluation                                                                                                                                                                                                                                                                              | 42                           |
| Global   | PubMed; African Index Medicus; Literatura Latinoamericana y del Caribe En Ciencia de la Salud (LILACS) | Translational research; operations research; community based participatory research; process assessment; health plan implementation; government programmes; national health programmes; efficiency organisational; patient acceptance of health care; health service accessibility; reproductive health services; disease and health conditions; communicable diseases; malnutrition; malnutrition; maternal mortality | 237                          |
| Americas | PubMed and LILACS                                                                                      | Indian; indigenous; aboriginal; native; amazon and all the different countries of Latin America                                                                                                                                                                                                                                                                                                                        | 690                          |



## Supplementary Table 8. List of publications included in the review by typology

## Original Research: Learning &amp; Evaluation (from research initiatives)

1. Abawi K, Chandra-Mouli V, Toskin I, Festin MP, Gertiser L, Idris R, Hamamy H, Ali M, Bonventure AM, Temmerman M *et al*: **E-learning for research capacity strengthening in sexual and reproductive health: The experience of the Geneva Foundation for Medical Education and Research and the Department of Reproductive Health and Research, World Health Organization.** *Human resources for health* 2016, **14**(1).
2. Aidam J, Sombie I: **The West African Health Organization's experience in improving the health research environment in the ECOWAS region.** *Health research policy and systems* 2016, **14**:30.
3. Atkins S, Yan W, Meragia E, Mahomed H, Rosales-Klitz S, Skinner D, Zwarenstein M: **Student experiences of participating in five collaborative blended learning courses in Africa and Asia: a survey.** *Global health action* 2016, **9**:28145.
4. Byrne E, Donaldson L, Manda-Taylor L, Brugha R, Matthews A, MacDonald S, Mwapasa V, Petersen M, Walsh A: **The use of technology enhanced learning in health research capacity development: lessons from a cross country research partnership.** *Globalization and health* 2016, **12**(19):
5. Cole DC, Nyirenda LJ, Fazal N, Bates I: **Implementing a national health research for development platform in a low-income country - a review of Malawi's Health Research Capacity Strengthening Initiative.** *Health research policy and systems* 2016, **14**(24):
6. Elmusharaf K, Tahir H, D OD, Brugha R, Homeida M, Abbas AM, Byrne E: **From local to global: a qualitative review of the multi-leveled impact of a multi-country health research capacity development partnership on maternal health in Sudan.** *Globalization and health* 2016, **12**(1):20.
7. Farnman R, Diwan V, Zwarenstein M, Atkins S: **Successes and challenges of north-south partnerships - key lessons from the African/Asian Regional Capacity Development projects.** *Global health action* 2016, **9**:30522.
8. Kaser M, Maure C, Halpaap BM, Vahedi M, Yamaka S, Launois P, Casamitjana N: **Research Capacity Strengthening in Low and Middle Income Countries - An Evaluation of the WHO/TDR Career Development Fellowship Programme.** *PLoS neglected tropical diseases* 2016, **10**(5):e0004631.
9. Mahendradhata Y, Nabieva J, Ahmad RA, Henley P, Launois P, Merle C, Maure C, Horstick O, Elango V: **Promoting good health research practice in low- and middle-income countries.** *Global health action* 2016, **9**:32474.
10. Protsiv M, Atkins S: **The experiences of lecturers in African, Asian and European universities in preparing and delivering blended health research methods courses: a qualitative study.** *Global health action* 2016, **9**:28149.
11. Protsiv M, Rosales-Klitz S, Bwanga F, Zwarenstein M, Atkins S: **Blended learning across universities in a South-North-South collaboration: a case study.** *Health research policy and systems* 2016, **14**(67):
12. Thomson DR, Semakula M, Hirschhorn LR, Murray M, Ndahindwa V, Manzi A, Mukabutera A, Karema C, Condo J, Hedt-Gauthier B: **Applied statistical training to strengthen analysis and health research capacity in Rwanda.** *Health research policy and systems* 2016, **14**(1).
13. Varshney D, Atkins S, Das A, Diwan V: **Understanding collaboration in a multi-national research capacity-building partnership: a qualitative study.** *Health research policy and systems* 2016, **14**(1):64.
14. Ager A, Zarowsky C: **Balancing the personal, local, institutional, and global: multiple case study and multidimensional scaling analysis of African experiences in addressing complexity and political economy in health research capacity strengthening.** *Health research policy and systems* 2015, **13**(5):
15. Daniels J, Nduati R, Kiarie J, Farquhar C: **Supporting early career health investigators in Kenya: a qualitative study of HIV/AIDS research capacity building.** *Pan African Medical Journal* 2015, **20**:192-192.
16. Dean L, Njelesani J, Smith H, Bates I: **Promoting sustainable research partnerships: a mixed-method evaluation of a United Kingdom-Africa capacity strengthening award scheme.** *Health research policy and systems* 2015, **13**(81):
17. Heller RF, Machingura PI, Musa BM, Paramita S, Myles P: **Mobilising the alumni of a Master of Public Health degree to build research and development capacity in low- and middle-income settings: the Peoples-uni.** *Health research policy and systems* 2015, **13**(71):
18. Ndebele P, Wassenaar D, Benatar S, Fleischer T, Kruger M, Adebamowo C, Kass N, Hyder AA: **Research ethics capacity building in sub-saharan Africa: A review of NIH fogarty-funded programs 2000-2012.** *Journal of Empirical Research on Human Research Ethics* 2014, **9**(2):24-40.

19. Saenz C, Heitman E, Luna F, Litewka S, Goodman KW, Macklin R: **Twelve years of fogarty-funded bioethics training in latin America and the caribbean: Achievements and challenges.** *Journal of Empirical Research on Human Research Ethics* 2014, **9**(2):80-91.
20. Zachariah R, Guillermin N, Berger S, Kumar AMV, Satyanarayana S, Bissell K, Edginton M, Hinderaker SG, Tayler-Smith K, Bergh Rvd *et al*: **Research to policy and practice change: is capacity building in operational research delivering the goods?** *Tropical Medicine and International Health* 2014, **19**(9):1068-1075.
21. Bennett S, Paina L, Ssengooba F, Waswa D, M'Imunya JM: **Mentorship in African health research training programs: an exploratory study of Fogarty International Center Programs in Kenya and Uganda.** *Education for health (Abingdon, England)* 2013, **26**(3):183-187.
22. Bennett S, Paina L, Ssengooba F, Waswa D, M'Imunya JM: **The impact of Fogarty International Center research training programs on public health policy and program development in Kenya and Uganda.** *BMC public health* 2013, **13**(770):
23. Marjanovic S, Hanlin R, Diepeveen S, Chataway J: **Research capacity-building in Africa: Networks, institutions and local ownership.** *Journal of International Development* 2013, **25**(7):936-946.
24. Miiro GM, Oukem-Boyer OO, Sarr O, Rahmani M, Ntoui F, Dheda K, Pym A, Mboup S, Kaleebu P: **EDCTP regional networks of excellence: initial merits for planned clinical trials in Africa.** *BMC public health* 2013, **13**:258.
25. Vian T, Koseki S, Feeley FG, Beard J: **Strengthening capacity for AIDS vaccine research: analysis of the Pfizer Global Health Fellows Program and the International AIDS Vaccine Initiative.** *BMC health services research* 2013, **13**(378):
26. Wilson LL, Rice M, Jones CT, Joiner C, Laborde J, McCall K, Jester PM, Carter SC, Boone C, Onwuzuligbo U *et al*: **Enhancing research capacity for global health: Evaluation of a distance-based program for international study coordinators.** *Journal of Continuing Education in the Health Professions* 2013, **33**(1):67-75.
27. Bennett S, Corluka A, Doherty J, Tangcharoensathien V: **Approaches to developing the capacity of health policy analysis institutes: a comparative case study.** *Health research policy and systems* 2012, **10**(7):
28. Bissell K, Harries AD, Reid AJ, Edginton M, Hinderaker SG, Satyanarayana S, Enarson DA, Zachariah R: **Operational research training: the course and beyond.** *Public health action* 2012, **2**(3):92-97.
29. Redman-Maclaren M, MacLaren DJ, Harrington H, Asugeni R, Timothy-Harrington R, Kekeubata E, Speare R: **Mutual research capacity strengthening: a qualitative study of two-way partnerships in public health research.** *International journal for equity in health* 2012, **11**(79):
30. Mahmood S, Hort K, Ahmed S, Salam M, Cravioto A: **Strategies for capacity building for health research in Bangladesh: Role of core funding and a common monitoring and evaluation framework.** *Health research policy and systems* 2011, **9**.
31. Minja H, Nsanabana C, Maure C, Hoffmann A, Rumisha S, Ogundahunsi O, Zicker F, Tanner M, Launois P: **Impact of health research capacity strengthening in low- and middle-income countries: the case of WHO/TDR programmes.** *PLoS neglected tropical diseases* 2011, **5**(10):e1351-e1351.
32. Goto A, Nguyen Quang V, Nguyen Thi Tu V, Yokokawa H, Yasumura S, Nguyen Thy K: **Epidemiology research training in Vietnam: evaluation at the five year mark.** *Fukushima journal of medical science* 2010, **56**(1):63-70.
33. Mayhew SH, Doherty J, Pitayarangsarit S: **Developing health systems research capacities through north-south partnership: an evaluation of collaboration with South Africa and Thailand.** *Health research policy and systems* 2008, **6**(8):
34. Jönsson K, Tomson G, Jönsson C, Kounnavong S, Wahlström R: **Health systems research in Lao PDR: capacity development for getting research into policy and practice.** *Health research policy and systems* 2007, **5**(11):
35. Hyder AA, Akhter T, Qayyum A: **Capacity development for health research in Pakistan: The effects of doctoral training.** *Health policy and planning* 2003, **18**(3):338-343.
36. Jentsch B, Pilley C: **Research relationships between the South and the North: Cinderella and the ugly sisters?** *Social Science and Medicine* 2003, **57**(10):1957-1967.

#### Original Research: Capacity Assessment

37. Erasmus E, Lehmann U, Agyepong IA, Alwar J, de Savigny D, Kamuzora P, Mirzoev T, Nxumalo N, Tomson G, Uzochukwu B *et al*: **Strengthening post-graduate educational capacity for health policy and systems research and analysis: the strategy of the Consortium for Health Policy and Systems Analysis in Africa.** *Health research policy and systems* 2016, **14**:29.

- 1
  - 2
  - 3
  - 4
  - 5
  - 6
  - 7
  - 8
  - 9
  - 10
  - 11
  - 12
  - 13
  - 14
  - 15
  - 16
  - 17
  - 18
  - 19
  - 20
  - 21
  - 22
  - 23
  - 24
  - 25
  - 26
  - 27
  - 28
  - 29
  - 30
  - 31
  - 32
  - 33
  - 34
  - 35
  - 36
  - 37
  - 38
  - 39
  - 40
  - 41
  - 42
  - 43
  - 44
  - 45
  - 46
  - 47
  - 48
  - 49
  - 50
  - 51
  - 52
  - 53
  - 54
  - 55
  - 56
  - 57
  - 58
  - 59
  - 60
38. Uzochukwu B, Mbachu C, Onwujekwe O, Okwuosa C, Etiaba E, Nyström ME, Gilson L: **Health policy and systems research and analysis in Nigeria: examining health policymakers' and researchers' capacity assets, needs and perspectives in south-east Nigeria.** *Health research policy and systems* 2016, **14**(13):
39. Agyepong IA, Anniah K, Aikins M, Akweongo P, Esena R, Mirzoev T: **Health Policy, Health Systems Research and Analysis Capacity Assessment of the School of Public Health, University of Ghana.** *Ghana medical journal* 2015, **49**(3):200-213.
40. Motari M, Ota MO, Kirigia JM: **Readiness of ethics review systems for a changing public health landscape in the WHO African Region Ethics in Biomedical Research.** *BMC medical ethics* 2015, **16**(1).
41. Oliver S, Bangpan M, Stansfield C, Stewart R: **Capacity for conducting systematic reviews in low- and middle-income countries: a rapid appraisal.** *Health research policy and systems* 2015, **13**(23):
42. Ekeroma AJ, Kenealy T, Shulruf B, McCowan LM, Hill A: **Building reproductive health research and audit capacity and activity in the pacific islands (BRRACAP) study: Methods, rationale and baseline results.** *BMC medical education* 2014, **14**(1).
43. Haafkens J, Blomstedt Y, Eriksson M, Becher H, Ramroth H, Kinsman J: **Training needs for research in health inequities among health and demographic researchers from eight African and Asian countries.** *BMC public health* 2014, **14**(1254):
44. Kanoute A, Faye D, Bourgeois D: **Strategies to promote better research on oral health in Africa: a Delphi consensus study.** *Contemporary clinical dentistry* 2014, **5**(1):13-19.
45. Kebede D, Zielinski C, Mbondji PE, Sanou I, Kouvidila W, Lusamba-Dikassa PS: **Human resources in health research institutions in sub-Saharan African countries: results of a questionnaire-based survey.** *Journal of the Royal Society of Medicine* 2014, **107**(Suppl. 1):85-95.
46. Kilic B, Phillimore P, Islek D, Oztoprak D, Korkmaz E, Abu-Rmeileh N, Zaman S, Unal B: **Research capacity and training needs for non-communicable diseases in the public health arena in Turkey.** *BMC health services research* 2014, **14**:373.
47. Mirzoev T, Lê G, Green A, Orgill M, Komba A, Esena RK, Nyapada L, Uzochukwu B, Amde WK, Nxumalo N *et al*: **Assessment of capacity for Health Policy and Systems Research and Analysis in seven African universities: results from the CHEPSAA project.** *Health policy and planning* 2014, **29**(7):831-841.
48. Simba D, Mukose A, Bazeyo W: **Institutional capacity for health systems research in East and Central African schools of public health: strengthening human and financial resources.** *Health research policy and systems* 2014, **12**(23):
49. Franzen SR, Chandler C, Enquesslassie F, Siribaddana S, Atashili J, Angus B, Lang T: **Understanding the investigators: a qualitative study investigating the barriers and enablers to the implementation of local investigator-initiated clinical trials in Ethiopia.** *BMJ open* 2013, **3**(11):e003616.
50. Hofman K, Blomstedt Y, Addei S, Kalage R, Maredza M, Sankoh O, Bangha M, Kahn K, Becher H, Haafkens J *et al*: **Addressing research capacity for health equity and the social determinants of health in three African countries: the INTREC programme.** *Global health action* 2013, **6**(1):19668.
51. Nachega JB, Uthman OA, Ho Y, Lo M, Anude C, Kayembe P, Wabwire-Mangen F, Gomo E, Sow PS, Obike U *et al*: **Current status and future prospects of epidemiology and public health training and research in the WHO African region.** *International journal of epidemiology* 2012, **41**(6):1829-1846.
52. Paulus JK, Santoyo-Vistrain R, Havelick D, Cohen A, Kalyesubula R, Ajayi IO, Mattsson JG, Adami HO, Dalal S: **Global teaching and training initiatives for emerging cohort studies.** *Journal of epidemiology and global health* 2012, **2**(3):125-133.
53. Peykari N, Djalalinia S, Owlia P, Habibi E, Falahat K, Ghanei M, Malekafzali H, Baradaran Eftekhari M: **Health research system evaluation in I.R. of Iran.** *Archives of Iranian medicine* 2012, **15**(7):394-399.
54. Keshavarz Mohammadi N, Zaree F, de Leeuw E, Emamjomeh MM: **Share of nations in 37 international public health journals: An equity and diversity perspective towards health research capacity building.** *Iranian journal of public health* 2011, **40**(4):129-137.
55. Magesa SM, Mwape B, Mboera LE: **Challenges and opportunities in building health research capacity in Tanzania: a case of the National Institute for Medical Research.** *Tanzania journal of health research* 2011, **13**(5):427-443.
56. Nakanjako D, Byakika-Kibwika P, Kintu K, Aizire J, Nakwagala F, Luzige S, Namisi C, Mayanja-Kizza H, Kanya MR: **Mentorship needs at academic institutions in resource-limited settings: A survey at makerere university college of health sciences.** *BMC medical education* 2011, **11**(1).
57. Pepping F: **The current capacity for training in public health nutrition in West Africa.** *Global public health* 2010, **5**(Suppl. 1):S20-S41.

- 1  
2  
3  
4  
5  
6  
7  
8  
9  
10  
11  
12  
13  
14  
15  
16  
17  
18  
19  
20  
21
58. Redman-MacLaren ML, MacLaren DJ, Asugeni R, Fa'anuabae CE, Harrington H, Muse A, Speare R, Clough AR: **"We can move forward": challenging historical inequity in public health research in Solomon Islands.** *International journal for equity in health* 2010, **9**(25):
59. Nyika A, Kilama W, Chilengi R, Tangwa G, Tindana P, Ndebele P, Ikingura J: **Composition, training needs and independence of ethics review committees across Africa: Are the gate-keepers rising to the emerging challenges?** *Journal of medical ethics* 2009, **35**(3):189-193.
60. Malekafzali H, Eftekhari MB, Peykari N, Gholami FS, Djalali nia S, Owlia P, Habibi E, Mesgarpour B, Vasei M: **Research assessment of Iranian medical universities, an experience from a developing country.** *Iranian journal of public health* 2009, **38**(Suppl.1):47-49.
61. Moodley K, Myer L: **Health Research Ethics Committees in South Africa 12 years into democracy.** *BMC medical ethics* 2007, **8**.
62. Singh D: **Publication bias - A reason for the decreased research output in developing countries.** *South African Psychiatry Review* 2006, **9**(3):
63. Cuboni HD, Finau SA, Wainiqolo I, Cuboni G: **Fijian participation in health research: analysis of Medline publications 1965-2002.** *Pacific health dialog : a publication of the Pacific Basin Officers Training Program and the Fiji School of Medicine* 2004, **11**(1):59-78.

#### Original Research: HRCS Methods

- 22  
23  
24  
25  
26  
27  
28  
29  
30  
31  
32  
33  
34  
35  
36  
37  
38  
39  
40  
41  
42
64. Murphy J, Hatfield J, Afsana K, Neufeld V: **Making a Commitment to Ethics in Global Health Research Partnerships: A Practical Tool to Support Ethical Practice.** *Journal of Bioethical Inquiry* 2015, **12**(1):137-146.
65. Bates I, Boyd A, Smith H, Cole DC: **A practical and systematic approach to organisational capacity strengthening for research in the health sector in Africa.** *Health research policy and systems* 2014, **12**(11):
66. Huber J, Bauer D, Hoelscher M, Kapungu J, Kroidl A, Lennemann T, Maganga L, Opitz O, Salehe O, Sigauke A *et al*: **Evaluation of health research capacity strengthening trainings on individual level: Validation of a questionnaire.** *Journal of evaluation in clinical practice* 2014, **20**(4):390-395.
67. Le G, Mirzoev T, Orgill M, Erasmus E, Lehmann U, Okeyo S, Goudge J, Maluka S, Uzochukwu B, Aikins M *et al*: **A new methodology for assessing health policy and systems research and analysis capacity in African universities.** *Health research policy and systems* 2014, **12**:59.
68. Jessani N, Lewy D, Ekirapa-Kiracho E, Bennett S: **Institutional capacity for health systems research in East and Central African schools of public health: experiences with a capacity assessment tool.** *Health research policy and systems* 2014, **12**(21):
69. Birch AP, Tuck J, Malata A, Gagnon AJ: **Assessing global partnerships in graduate nursing.** *Nurse education today* 2013, **33**(11):1288-1294.
70. Bates I, Akoto AY, Ansong D, Karikari P, Bedu-Addo G, Critchley J, Agbenyega T, Nsiah-Asare A: **Evaluating health research capacity building: an evidence-based tool.** *PLoS medicine* 2006, **3**(8):e299.

#### Original Research: HRCS Evidence Synthesis

- 43  
44  
45  
46  
47  
48  
49  
50  
51  
52  
53  
54  
55  
56  
57  
58  
59  
60
71. Bates I, Boyd A, Aslanyan G, Cole DC: **Tackling the tensions in evaluating capacity strengthening for health research in low- and middle-income countries.** *Health policy and planning* 2015, **30**(3):334-344.
72. Cole DC, Boyd A, Aslanyan G, Bates I: **Indicators for tracking programmes to strengthen health research capacity in lower- and middle-income countries: a qualitative synthesis.** *Health research policy and systems* 2014, **12**(17):(12 A-(12 A.
73. Boyd A, Cole DC, Cho DB, Aslanyan G, Bates I: **Frameworks for evaluating health research capacity strengthening: a qualitative study.** *Health research policy and systems* 2013, **11**(46):
74. Gadsby EW: **Research capacity strengthening: donor approaches to improving and assessing its impact in low- and middle-income countries.** *International Journal of Health Planning and Management* 2011, **26**(1):89-106.
75. Edwards N, Webber J, Mill J, Kahwa E, Roelofs S: **Building capacity for nurse-led research.** *International nursing review* 2009, **56**(1):88-94.

#### Original Research: Miscellaneous

- 1  
2  
3  
4  
5  
6  
7  
8  
9  
10  
11  
12  
13  
14
76. Cole DC, Johnson N, Mejia R, McCullough H, Turcotte-Tremblay AM, Barnoya J, Falabella Luco MS: **Mentoring health researchers globally: Diverse experiences, programmes, challenges and responses.** *Global public health* 2016, **11**(9):1093-1108.
  77. Parker M, Kingori P: **Good and bad research collaborations: Researchers' views on science and ethics in global health research.** *PloS one* 2016, **11**(10).
  78. Muldoon KA, Birungi J, Berry NS, Ngolobe MH, Mwesigwa R, Shannon K, Moore DM: **Supporting southern-led research: Implications for north-south research partnerships.** *Canadian Journal of Public Health* 2012, **103**(2):128-131.
  79. Nurse K, Wight D: **Development assistance and research capacity strengthening: the commissioning of health research in East Africa.** *Journal of Eastern African Studies* 2011, **5**(2):233-251.

### 15 16 17 18 19 20 21 22 23 24 25 26 27 28 29 30 31 32 33 34 35 36 37 38 39 40 41 42 43 44 45 46 47 48 49 50 51 52 53 54 55 56 57 58 59 60

80. Atkins S, Marsden S, Diwan V, Zwarenstein M: **North-south collaboration and capacity development in global health research in low- and middle-income countries - the ARCADE projects.** *Global health action* 2016, **9**:30524.
81. Atkins S, Varshney D, Meragia E, Zwarenstein M, Diwan V: **'Research clinics': online journal clubs between south and north for student mentoring.** *Global health action* 2016, **9**:30434.
82. Bloomfield GS, Narayan KM, Sampson UK, Narula J: **What Defines a Valuable Investment in Global Health Research?** *Global heart* 2016, **11**(1):1-3.
83. Bloomfield GS, Xavier D, Belis D, Alam D, Davis P, Dorairaj P, Ghannem H, Gilman RH, Kamath D, Kimaiyo S *et al*: **Training and Capacity Building in LMIC for Research in Heart and Lung Diseases: The NHLBI-UnitedHealth Global Health Centers of Excellence Program.** *Global heart* 2016, **11**(1):17-25.
84. Cubaka VK, Schriver M, Kyamanywa P, Cotton P, Kallestrup P: **Capacity-building for equitable global health research from Africa: the power of two.** *International journal of public health* 2016, **61**(3):389-390.
85. Davies J, Mullan Z: **Research capacity in Africa--will the sun rise again?** *The Lancet Global health* 2016, **4**(5):e287.
86. Dossou JP, Assarag B, Delamou A, Van der Veken K, Belaid L, Ouedraogo M, Khalfallah S, Aouras H, Diadhiou M, Fassassi R *et al*: **Switching the poles in sexual and reproductive health research: implementing a research capacity-strengthening network in West and North Africa.** *Reproductive health* 2016, **13**(1):91.
87. Hawkes S, Aulakh BK, Jadeja N, Jimenez M, Buse K, Anwar I, Barge S, Odubanjo MO, Shukla A, Ghaffar A *et al*: **Strengthening capacity to apply health research evidence in policy making: Experience from four countries.** *Health policy and planning* 2016, **31**(2):161-170.
88. Hyder AA, Norton R, Perez-Nunez R, Mojarro-Iniguez FR, Peden M, Kobusingye O: **The Road Traffic Injuries Research Network: a decade of research capacity strengthening in low- and middle-income countries.** *Health research policy and systems* 2016, **14**:14.
89. O'Connor S, Gallagher J, Wamba N, Moyo C, Chirambo GB, O'Donoghue J: **Establishing Long-Term Nursing Informatics Capacity in Malawi, Africa.** *Studies in health technology and informatics* 2016, **225**:1013-1014.
90. Osanjo GO, Oyugi JO, Kibwage IO, Mwanda WO, Ngugi EN, Otieno FC, Ndege W, Child M, Farquhar C, Penner J *et al*: **Building capacity in implementation science research training at the University of Nairobi.** *Implementation science : IS* 2016, **11**:30.
91. Sturke R, Vorkoper S, Duncan K, Levintova M, Parascondola M: **Addressing NCDs through research and capacity building in LMICs: lessons learned from tobacco control.** *Global health action* 2016, **9**:32407.
92. Winchester MS, BeLue R, Oni T, Wittwer-Backofen U, Deobagkar D, Onya H, Samuels TA, Matthews SA, Stone C, Airhihenbuwa C: **The Pan-University Network for Global Health: framework for collaboration and review of global health needs.** *Globalization and health* 2016, **12**:13.
93. Adanu R, Mbizvo MT, Baguiya A, Adam V, Ademe BW, Ankomah A, Aja GN, Ajuwon AJ, Esimai OA, Ibrahim T *et al*: **Sexual and Reproductive Health Research and Research Capacity Strengthening in Africa: Perspectives from the region.** *Reproductive health* 2015, **12**:64.
94. Airhihenbuwa CO, Ogedegbe G, Iwelunmor J, Jean-Louis G, Williams N, Zizi F, Okuyemi K: **Claim Your Space: Leadership Development as a Research Capacity Building Goal in Global Health.** *Health Education and Behavior* 2015, **43**:17S-24S.
95. Berman J, Mitambo C, Matanje-Mwagomba B, Khan S, Kachimanga C, Wroe E, Mwape L, Oosterhout JJv, Chindebvu G, Schoor Vv *et al*: **Building a knowledge translation platform in Malawi to support evidence-informed health policy.** *Health research policy and systems* 2015, **13**(73):(8 December 2015)-(2018 December 2015).

- 1  
2  
3  
4  
5  
6  
7  
8  
9  
10  
11  
12  
13  
14  
15  
16  
17  
18  
19  
20  
21  
22  
23  
24  
25  
26  
27  
28  
29  
30  
31  
32  
33  
34  
35  
36  
37  
38  
39  
40  
41  
42  
43  
44  
45  
46  
47  
48  
49  
50  
51  
52  
53  
54  
55  
56  
57  
58  
59  
60
96. Cash-Gibson L, Guerra G, Salgado-de-Snyder VN: **SDH-NET: a South-North-South collaboration to build sustainable research capacities on social determinants of health in low- and middle-income countries.** *Health research policy and systems* 2015, **13**(45):(22 October 2015)-(2022 October 2015).
  97. Cottler LB, Zunt J, Weiss B, Kamal AK, Vaddiparti K: **Building global capacity for brain and nervous system disorders research.** *Nature* 2015, **527**(7578):S207-213.
  98. Kombe F: **Enhancing quality and integrity in biomedical research in Africa: An international call for greater focus, investment and standardisation in capacity strengthening for frontline staff.** *BMC medical ethics* 2015, **16**(1).
  99. Koso-Thomas M, McClure EM, Belizán JM, Althabe F, Buekens PM, Tshetu A, Bose CL, Garces A, Hambidge KM, Krebs NF *et al*: **The Global Network for Women's and Children's Health Research: A model of capacity-building research.** *Seminars in Fetal and Neonatal Medicine* 2015, **20**(5):293-299.
  100. Langlois EV, Ranson MK, Barnighausen T, Bosch-Capblanch X, Daniels K, El-Jardali F, Ghaffar A, Grimshaw J, Haines A, Lavis JN *et al*: **Advancing the field of health systems research synthesis.** *Systematic reviews* 2015, **4**:90.
  101. MacLaren D, Asugeni J, Redman-MacLaren M: **Strengthening research capacity in the Pacific: an example from the Atoifi Health Research Group, Solomon Islands.** *Australasian psychiatry : bulletin of Royal Australian and New Zealand College of Psychiatrists* 2015, **23**(6):42-44.
  102. McGregor S, Henderson KJ, Kaldor JM: **Capacity building in longitudinal HIV research.** *The Lancet Global health* 2015, **3**(1):e18-19.
  103. Miranda JJ, Bernabe-Ortiz A, Diez-Canseco F, Malaga G, Cardenas MK, Carrillo-Larco RM, Pesantes MA, Araya R, Boggio O, Checkley W *et al*: **Building a platform for translational research in chronic noncommunicable diseases to address population health: lessons from NHLBI supported CRONICAS in Peru.** *Global heart* 2015, **10**(1):13-19.
  104. Adedokun B, Nyasulu P, Maseko F, Adedini S, Akinyemi J, Afolabi S, Wet Nd, Sulaimon A, Sambai C, Utembe W *et al*: **Sharing perspectives and experiences of doctoral fellows in the first cohort of Consortium for Advanced Research Training in Africa: 2011-2014.** *Global health action* 2014, **7**:25127-25127.
  105. Anderson F, Donkor P, de Vries R, Appiah-Denkyira E, Dakpallah GF, Rominski S, Hassinger J, Lou A, Kwansah J, Moyer C *et al*: **Creating a charter of collaboration for international university partnerships: the Elmina Declaration for Human Resources for Health.** *Academic medicine : journal of the Association of American Medical Colleges* 2014, **89**(8):1125-1132.
  106. Carothers CL, Heimburger DC, Schlachter S, Gardner P, Primack A, Warner TL, Vermund SH: **Training programs within global networks: lessons learned in the fogarty international clinical research scholars and fellows program.** *American Journal of Tropical Medicine and Hygiene* 2014, **90**(1):173-179.
  107. Chu KM, Jayaraman S, Kyamanywa P, Ntakiyiruta G: **Building Research Capacity in Africa: Equity and Global Health Collaborations.** *PLoS medicine* 2014, **11**(3).
  108. Cole DC, Aslanyan G, Dunn A, Boyd A, Bates I: **Dilemmas of evaluation: Health research capacity initiatives.** *Bulletin of the World Health Organization* 2014, **92**(12):920-921.
  109. Hanney SR, González-Block MA: **Four centuries on from Bacon: Progress in building health research systems to improve health systems?** *Health research policy and systems* 2014, **12**(1).
  110. Harries AD, Marais B, Kool B, Ram S, Kumar AM, Gounder S, Viney K, Brostrom R, Roseveare C, Bissell K *et al*: **Mentorship for operational research capacity building: hands-on or hands-off?** *Public health action* 2014, **4**(Suppl 1):S56-58.
  111. Kabiru CW, Izugbara CO, Wairimu J, Amendah D, Ezeh AC: **Strengthening local health research capacity in Africa: the African Doctoral Dissertation Research Fellowship Program.** *The Pan African medical journal* 2014, **17**:1.
  112. Klinkenberg E, Assefa D, Rusen ID, Dlodlo RA, Shimeles E, Kebede B, Fiseha D, Tsegaye F, Leimane I, Teklai Y *et al*: **The Ethiopian initiative to build sustainable capacity for operational research: overview and lessons learned.** *Public health action* 2014, **4**(Suppl 3):S2-7.
  113. Mandala WL, Cowan FM, Laloo DG, Wilkinson RJ, Kelly P, Chidzonga MM, Michelo C, Gomo E, Bailey R, Simuyemba M *et al*: **Southern Africa consortium for research excellence (SACORE): successes and challenges.** *The Lancet Global health* 2014, **2**(12):e691-692.
  114. Pratt B, Loff B: **A framework to link international clinical research to the promotion of justice in global health.** *Bioethics* 2014, **28**(8):387-396.
  115. Ramsay A, Harries AD, Zachariah R, Bissell K, Hinderaker SG, Edginton M, Enarson DA, Satyanarayana S, Kumar AM, Hoa NB *et al*: **The Structured Operational Research and Training Initiative for public health programmes.** *Public health action* 2014, **4**(2):79-84.

- 1  
2  
3  
4  
5  
6  
7  
8  
9  
10  
11  
12  
13  
14  
15  
16  
17  
18  
19  
20  
21  
22  
23  
24  
25  
26  
27  
28  
29  
30  
31  
32  
33  
34  
35  
36  
37  
38  
39  
40  
41  
42  
43  
44  
45  
46  
47  
48  
49  
50  
51  
52  
53  
54  
55  
56  
57  
58  
59  
60
116. Sweetland AC, Oquendo MA, Sidat M, Santos PF, Vermund SH, Duarte CS, Arbuckle M, Wainberg ML: **Closing the mental health gap in low-income settings by building research capacity: perspectives from Mozambique.** *Annals of global health* 2014, **80**(2):126-133.
117. Ekeroma A: **Building clinical research capacity in the Pacific Islands.** *Journal of primary health care* 2013, **5**(3):257-258.
118. Noormahomed EV, Mocumbi AO, Preziosi M, Damasceno A, Bickler S, Smith DM, Funzamo C, Aronoff-Spencer E, Badaro R, Mabila F *et al*: **Strengthening research capacity through the medical education partnership initiative: the Mozambique experience.** *Human resources for health* 2013, **11**:62.
119. Pratt B, Loff B: **Linking research to global health equity: the contribution of product development partnerships to access to medicines and research capacity building.** *American journal of public health* 2013, **103**(11):1968-1978.
120. Sanchez AL, Canales M, Enriquez L, Zelaya AA, Espinoza VE, Fontecha GA: **Research capacity strengthening in Honduras.** *The Lancet Global health* 2013, **1**(2):e75.
121. Sanchez AL, Canales M, Enriquez L, Bottazzi ME, Zelaya AA, Espinoza VE, Fontecha GA: **A research capacity strengthening project for infectious diseases in Honduras: experience and lessons learned.** *Global health action* 2013, **6**:21643-21643.
122. Shaji KS: **Capacity building in mental health research: The way forward.** *Indian journal of psychological medicine* 2013, **35**(3):302-304.
123. Vasquez EE, Hirsch JS, Giang le M, Parker RG: **Rethinking health research capacity strengthening.** *Global public health* 2013, **8 Suppl 1**:S104-124.
124. Aikins AdG, Arhinful DK, Pitchforth E, Ogedegbe G, Allotey P, Agyemang C: **Establishing and sustaining research partnerships in Africa: a case study of the UK-Africa Academic Partnership on Chronic Disease.** *Globalization and health* 2012, **8**(29):
125. Greenwood B, Bhasin A, Targett G: **The Gates Malaria Partnership: a consortium approach to malaria research and capacity development.** *Tropical Medicine and International Health* 2012, **17**(5):558-563.
126. Ijsselmuiden C, Marais DL, Becerra-Posada F, Ghannem H: **Africa's neglected area of human resources for health research - the way forward.** *South African Medical Journal* 2012, **102**(4):228-233.
127. Kasonde JM, Campbell S: **Creating a Knowledge Translation Platform: nine lessons from the Zambia Forum for Health Research.** *Health research policy and systems* 2012, **10**:31.
128. McKee M, Stuckler D, Basu S: **Where there is no health research: What can be done to fill the global gaps in health research?** *PLoS medicine* 2012, **9**(4):
129. Nwaka S, Ochem A, Besson D, Ramirez B, Fakorede F, Botros S, Inyang U, Mgone C, Adaye Mensah I, Konde V *et al*: **Analysis of pan-African Centres of excellence in health innovation highlights opportunities and challenges for local innovation and financing in the continent.** *BMC international health and human rights* 2012, **12**(1):
130. Osei-Atweneboana MY, Lustigman S, Prichard RK, Boatman BA, Basanez MG: **A research agenda for helminth diseases of humans: health research and capacity building in disease-endemic countries for helminthiasis control.** *PLoS neglected tropical diseases* 2012, **6**(4):e1602.
131. Pinto RM, Da Silva SB, Penido C, Spector AY: **International participatory research framework: Triangulating procedures to build health research capacity in Brazil.** *Health promotion international* 2012, **27**(4):435-444.
132. Thornicroft G, Cooper S, Bortel TV, Kakuma R, Lund C: **Capacity building in global mental health research.** *Harvard review of psychiatry* 2012, **20**(1):13-24.
133. Airhihenbuwa CO, Shisana O, Zungu N, BeLue R, Makofani DM, Shefer T, Smith E, Simbayi L: **Research capacity building: a US-South African partnership.** *Global health promotion* 2011, **18**(2):35-94.
134. Farquhar C, Nathanson N: **The Afya Bora Consortium: An Africa-US Partnership to Train Leaders in Global Health.** *Infectious disease clinics of North America* 2011, **25**(2):399-409.
135. Forde M, Morrison K, Dewailly E, Badrie N, Robertson L: **Strengthening integrated research and capacity development within the Caribbean region.** *BMC international health and human rights* 2011, **11**(Suppl. 2):S7-S7.
136. Gezmu M, Degruittola V, Dixon D, Essex M, Halloran E, Hogan J, Grobler A, Kim S, McDermott J, McKaig R *et al*: **Strengthening biostatistics resources in sub-Saharan Africa: Research collaborations through U.S. partnerships.** *Statistics in medicine* 2011, **30**(7):695-708.
137. Kariuki T, Phillips R, Njenga S, Olesen OF, Klatser PR, Porro R, Lock S, Cabral MH, Gliber M, Hanne D: **Research and capacity building for control of neglected tropical diseases: the need for a different approach.** *PLoS neglected tropical diseases* 2011, **5**(5):e1020.

- 1  
2  
3  
4  
5  
6  
7  
8  
9  
10  
11  
12  
13  
14  
15  
16  
17  
18  
19  
20  
21  
22  
23  
24  
25  
26  
27  
28  
29  
30  
31  
32  
33  
34  
35  
36  
37  
38  
39  
40  
41  
42  
43  
44  
45  
46  
47  
48  
49  
50  
51  
52  
53  
54  
55  
56  
57  
58  
59  
60
138. Laabes EP, Desai R, Zawedde SM, Glew RH: **How much longer will Africa have to depend on western nations for support of its capacity-building efforts for biomedical research?** *Tropical Medicine and International Health* 2011, **16**(3):258-262.
139. Manabe YC, Katabira E, Brough RL, Coutinho AG, Sewankambo N, Merry C: **Developing independent investigators for clinical research relevant for Africa.** *Health research policy and systems* 2011, **9**(44):
140. Wilson ME, Ko AI, Reis MG: **Collaborative teaching and learning: a model for building capacity and partnerships to address NTDs.** *PLoS neglected tropical diseases* 2011, **5**(3):e939-e939.
141. Brown KH, McLachlan M, Cardosa P, Tchibindat F, Baker SK: **Strengthening public health nutrition research and training capacities in West Africa: Report of a planning workshop convened in Dakar, Senegal, 26-28 March 2009.** *Global public health* 2010, **5** Suppl 1:S1-19.
142. Ezeh AC, Izugbara CO, Kabiru CW, Fonn S, Kahn K, Manderson L, Undieh AS, Omigbodun A, Thorogood M: **Building capacity for public and population health research in Africa: The consortium for advanced research training in Africa (CARTA) model.** *Global health action* 2010, **3**(1).
143. Kabiru CW, Izugbara CO, Wambugu SW, Ezeh AC: **Capacity development for health research in Africa: experiences managing the African Doctoral Dissertation Research Fellowship Program.** *Health research policy and systems* 2010, **8**(21):
144. Kutcher S, Horner B, Cash C, Lopez MF, Pascual MA: **Building psychiatric clinical research capacity in low and middle income countries: The Cuban-Canadian partnership project.** *Innovation Journal* 2010, **15**(1):1-10.
145. Lazarus JV, Wallace SA, Liljestrand J: **Improving African health research capacity.** *Scandinavian journal of public health* 2010, **38**(6):670-671.
146. Maher D, Biraro S, Hosegood V, Isingo R, Lutalo T, Mushati P, Ngwira B, Nyirenda M, Todd J, Zaba B: **Translating global health research aims into action: the example of the ALPHA network.** *Tropical Medicine and International Health* 2010, **15**(3):321-328.
147. Ntoumi F: **Networking and capacity building for health research in central Africa.** *Wiener klinische Wochenschrift* 2010, **122**(SUPPL. 1):23-26.
148. Zumla A, Huggett J, Dheda K, Green C, Kapata N, Mwaba P: **Trials and tribulations of an African-led research and capacity development programme: the case for EDCTP investments.** *Tropical Medicine and International Health* 2010, **15**(4):489-494.
149. Coloma J, Harris E: **From construction workers to architects: developing scientific research capacity in low-income countries.** *PLoS biology* 2009, **7**(7):e1000156.
150. Kilama W: **From research to control: Translating research findings into health policies, operational guidelines and health products.** *Acta tropica* 2009, **112**(SUPPL. 1).
151. Kilama WL: **The 10/90 gap in sub-Saharan Africa: Resolving inequities in health research.** *Acta tropica* 2009, **112**(SUPPL. 1).
152. Hussein G: **The Sudan experience.** *Journal of Academic Ethics* 2008, **6**(4):289-293.
153. Kumar N, Ravindran GD, Bhan A, Srivastava JS, Nair VM: **The India experience.** *Journal of Academic Ethics* 2008, **6**(4):295-303.
154. Malomo AO, Ogundiran TO, Jegede A, Adejumo A: **The Nigeria experience.** *Journal of Academic Ethics* 2008, **6**(4):305-309.
155. Sheikh S: **The Pakistan experience.** *Journal of Academic Ethics* 2008, **6**(4):283-287.
156. Tindana P, Boateng O: **The Ghana experience.** *Journal of Academic Ethics* 2008, **6**(4):277-281.
157. Upshur REG: **Introduction.** *Journal of Academic Ethics* 2008, **6**(4):271-275.
158. Whitworth JAG, Kokwaro G, Kinyanjui S, Snewin VA, Tanner M, Walport M, Sewankambo N: **Strengthening capacity for health research in Africa.** *Lancet (British edition)* 2008, **372**(9649):1590-1593.
159. Nuyens Y: **10 best resources for ... health research capacity strengthening.** *Health policy and planning* 2007, **22**(4):274-276.
160. Schulz-Baldes A, Vayena E, Biller-Andorno N: **Sharing benefits in international health research. Research-capacity building as an example of an indirect collective benefit.** *EMBO reports* 2007, **8**(1):8-13.
161. Stillman F, Yang G, Figueiredo V, Hernandez-Avila M, Samet J: **Building capacity for tobacco control research and policy.** *Tobacco control* 2006, **15**(Suppl.1):i18-i23.
162. Andruchow JE, Soskolne CL, Racioppi F, Bertolini R: **Capacity building for epidemiologic research: a case study in the newly independent state of Azerbaijan.** *Annals of epidemiology* 2005, **15**(3):228-231.
163. Goto A, Thi Ngoc Phuong N, Thi Mai Huong N, Hughes J: **Building postgraduate capacity in medical and public health research in Vietnam: An in-service training model.** *Public health* 2005, **119**(3):174-183.
164. Lansang MA, Dennis R: **Building capacity in health research in the developing world.** *Bulletin of the World Health Organization* 2004, **82**(10):764-770.



- 1  
2  
3 165.Nchinda TC: **Research capacity strengthening in the South.** *Social Science & Medicine* 2002, **54**(11):1699-  
4 1711.  
5 166.Reddy P, Taylor SE, Sifunda S: **Research capacity building and collaboration between South African and**  
6 **American partners: The adaptation of an intervention model for HIV/AIDS prevention in corrections**  
7 **research.** *AIDS Education and Prevention* 2002, **14**(5 SUPPL.):92-102.  
8 167.Varkevisser CM, Mwaluko GMP, Grand LE: **Research in action: The training approach of the Joint Health**  
9 **Systems Research Project for the Southern African Region.** *Health policy and planning* 2001, **16**(3):281-  
10 291.  
11

### 12 Systematic Review

- 13  
14  
15 168.Adedokun BO, Olopade CO, Olopade OI: **Building local capacity for genomics research in Africa:**  
16 **Recommendations from analysis of publications in Sub-Saharan Africa from 2004 to 2013.** *Global health*  
17 *action* 2016, **9**(1).  
18 169.Huber J, Nepal S, Bauer D, Wessels I, Fischer MR, Kiessling C: **Tools and instruments for needs assessment,**  
19 **monitoring and evaluation of health research capacity development activities at the individual and**  
20 **organizational level: A systematic review.** *Health research policy and systems* 2015, **13**(1).  
21 170.Mugabo L, Rouleau D, Odhiambo J, Nisingizwe MP, Amoroso C, Barebwanuwe P, Warugaba C, Habumugisha  
22 L, Hedt-Gauthier BL: **Approaches and impact of non-academic research capacity strengthening training**  
23 **models in sub-Saharan Africa: a systematic review.** *Health research policy and systems* 2015, **13**(30):  
24 171.González-Block MA, Vargas-Riaño EM, Sonela N, Idrovo AJ, Ouwe-Missi-Oukem-Boyer O, Monot JJ: **Research**  
25 **capacity for institutional collaboration in implementation research on diseases of poverty.** *Tropical*  
26 *Medicine and International Health* 2011, **16**(10):1285-1290.  
27 172.San Sebastian M, Hurtig AK: **Review of health research on indigenous populations in Latin America, 1995-**  
28 **2004.** *Salud publica de Mexico* 2007, **49**(4):316-320.  
29  
30  
31  
32  
33  
34  
35  
36  
37  
38  
39  
40  
41  
42  
43  
44  
45  
46  
47  
48  
49  
50  
51  
52  
53  
54  
55  
56  
57  
58  
59  
60

Supplementary Table 9. HRCS definitions, sources and citing papers<sup>1</sup>

| Subject Defined              | Capacity Term           | Definition & Source                                                                                                                                                                                                                                                                                                             | Cited In                                                                                                                                                                                                                                                               |
|------------------------------|-------------------------|---------------------------------------------------------------------------------------------------------------------------------------------------------------------------------------------------------------------------------------------------------------------------------------------------------------------------------|------------------------------------------------------------------------------------------------------------------------------------------------------------------------------------------------------------------------------------------------------------------------|
| Health                       | Building [30]           | "an ability of individuals, organisations or systems to perform and utilise health research effectively, efficiently and sustainably" [70]                                                                                                                                                                                      | [30, 70]                                                                                                                                                                                                                                                               |
| Research Capacity            | Strengthening [70]      | "the ability to define problems, set objectives and priorities, build sustainable institutions and organisations, and identify solutions to key national health problems" [1]                                                                                                                                                   | [74, 126, 166]                                                                                                                                                                                                                                                         |
|                              | Building [166]          | "a strategy that is implemented worldwide to improve the ability of developing countries to tackle the persistent and disproportionate burdens of disease they face" [2]                                                                                                                                                        | [123]                                                                                                                                                                                                                                                                  |
|                              | Strengthening [74, 126] | "the process required for building capacity in health research would be define the institutional systems needed to support research, enumerate existing and missing resources and improve research support by addressing the identified gaps" [70]                                                                              | [45]                                                                                                                                                                                                                                                                   |
|                              | Strengthening           | "the level of expertise and resources needed for the production of new knowledge and its application" [3] <sup>2</sup>                                                                                                                                                                                                          | [48]                                                                                                                                                                                                                                                                   |
|                              | Building                | "an approach to the development of sustainable skills, organisational structure, resources and commitment to health improvement...to multiply health gains many times over" [4] <sup>3</sup>                                                                                                                                    | [139]                                                                                                                                                                                                                                                                  |
|                              | Building                | "a systematic, purposeful and goal-oriented effort to strengthen human resources and infrastructure to enable local scientists and institutions to become independent and responsive to existing and emerging health needs and threats" [97] <sup>2</sup>                                                                       | [97]                                                                                                                                                                                                                                                                   |
|                              | Research Capacity       | Building [164]                                                                                                                                                                                                                                                                                                                  | "the ongoing process of empowering individuals, institutions, organisations, and nations to: define and prioritise problems systematically; develop and scientifically evaluate appropriate solutions; and share and apply the knowledge generated" [164] <sup>4</sup> |
| Strengthening [29, 123, 159] |                         | "process of individual and institutional development which leads to higher levels of skills and greater ability to perform useful research" [5]                                                                                                                                                                                 | [16, 72]                                                                                                                                                                                                                                                               |
| Strengthening [16, 72]       |                         | "the process by which individuals, organisations, and societies develop abilities (individually and collectively) to perform functions effectively, efficiently and in a sustainable manner to define problems, set objectives and priorities, build sustainable institutions and bring solutions to key national problems" [6] | [4, 31, 74]                                                                                                                                                                                                                                                            |
| Development [4]              |                         | "the ability to conduct, manage, disseminate, and apply research in policy and practice" [132]                                                                                                                                                                                                                                  | [132]                                                                                                                                                                                                                                                                  |
| Strengthening [31, 74]       |                         | "Includes any efforts to increase the ability of individuals and institutions to undertake high-quality research and to engage with the wider community of stakeholders" [7]                                                                                                                                                    | [91, 96]                                                                                                                                                                                                                                                               |
| Building                     |                         | "a long-term process that requires a systematic and inter-sectoral approach to developing appropriate regulatory frameworks, building and maintaining physical infrastructure, and investing in human resources, equipment and training in an environment conducive to research commitment and institutional support" [8]       | [130]                                                                                                                                                                                                                                                                  |

|                         |                                     |                                                                                                                                                                                                                                                                                                                                                                                                                             |            |
|-------------------------|-------------------------------------|-----------------------------------------------------------------------------------------------------------------------------------------------------------------------------------------------------------------------------------------------------------------------------------------------------------------------------------------------------------------------------------------------------------------------------|------------|
|                         | Strengthening                       | “consists of two main closely inter-related and inter-dependent activities, which, together, form the basis of institutional development. The two parts are: improving, through appropriate training, the capabilities of scientists to undertake quality research; improving institutional support – equipment, supplies and other logistic support to the institution in which the trained scientists have to work” [165] | [165]      |
|                         | Building                            | “strengthening the abilities of individuals, institutions, and countries to perform research functions, defining national problems and priorities, solving national problems, utilizing the results of research in policy making and programme delivery.” [9]                                                                                                                                                               | [46]       |
|                         | Strengthening                       | “goes beyond facilitating or funding a research project to the broader objectives of nurturing the prerequisites of the research process, such as state and institutional support, specialized training, infrastructural development, networking opportunities, publications and career paths.” [79]                                                                                                                        | [79]       |
|                         | Building                            | “a deliberate effort to augment health and social science research outputs as well as human capital, so as to favourably impact upon a research focus area” [166] <sup>5</sup>                                                                                                                                                                                                                                              | [166]      |
| Capacity                | Building                            | “a process that improves the ability of a person, group, organisation or system to meet its objectives or perform better” [10]                                                                                                                                                                                                                                                                                              | [25]       |
|                         | Building                            | “the process of helping communities and organisations harness human, technical and financial resources, which allows them to respond adequately to health issues in ways that inform such policies” [11]                                                                                                                                                                                                                    | [133]      |
|                         | Strengthening                       | “process through which people, organisations, and society as a whole are enabled to shape their own development and adapt it to changing conditions and frameworks” [12]                                                                                                                                                                                                                                                    | [66]       |
|                         | Strengthening                       | “process of improving individual skills, processes, and structures at the organisational level and the networks and context in which the organisation functions” [65]                                                                                                                                                                                                                                                       | [65]       |
|                         | Building                            | “helping recipient countries to invent, develop and maintain institutions and organisations which are capable of learning and bringing about their own transformation, so that they can play a dynamic role in supporting national development processes” [13]                                                                                                                                                              | [150]      |
|                         | Strengthening                       | “the ability of individuals or groups to perform tasks in a sustainable manner” [47]                                                                                                                                                                                                                                                                                                                                        | [47]       |
| Organisational capacity | Development                         | “the capacity of research departments in universities, think tanks and so on to fund, manage and maintain themselves” [14]                                                                                                                                                                                                                                                                                                  | [27]       |
| Progress                | Building [142]<br>Development [143] | “ability to understand, interpret, select, adapt, use, transmit, diffuse, produce and commercialise scientific and technological knowledge in ways appropriate to culture, aspirations and level of development” [15]                                                                                                                                                                                                       | [142, 143] |

1. Numbered citations in italics pertain to the reference list in Supplementary Table 1. Numbered citations in normal (non-italicised) font are listed below. 2. Presented as a definition of ‘Health Systems Research’ capacity. 3. Presented as a definition of ‘research capacity’ in citing publication, but included in the ‘health research capacity’ definition list as contains specific reference to ‘health research’. 4. Cited as definition of ‘health’ research capacity in [123]. 5. Presented as a definition of ‘capacity’ in citing publication, but included in the ‘research capacity’ definition list as contains specific reference to ‘research’

**List of References (not included in Supplementary Table 1)**

1. Global Forum for Health Research. The 10.90 report on health research. Geneva: Global Forum for Health Research, 2000.
2. Council on Health Research for Development. Beyond air: Research and innovation as key drivers for health, equity and development. Geneva: Council on Health Research for Development, 2012.
3. Block MAG, Mills A. Assessing capacity for health policy and systems research in low and middle income countries. *Health Research Policy and Systems*, 1(1), p.1. Health research policy and systems. 2003;1(1). doi: 10.1186/1478-4505-1-1.
4. Albert E, Mickan S. Closing the gap and widening the scope. New directions for research capacity building in primary health care. *Australian family physician*. 2003;32(12):1038-40, 43. PubMed PMID: 14708158.
5. Golenko X, Pager S, Holden L. A thematic analysis of the role of the organisation in building allied health research capacity: A senior managers perspective. *BMC health services research*. 2012;12(1). doi: 10.1186/1472-6963-12-276.
6. Global Forum for Health Research. The 10/90 Report on Health Research 2003-2004. Geneva: Global Forum for Health Research, 2004.
7. ESSENCE on Health Research. Seven principles for strengthening research capacity in low- and middle-income countries: simple ideas in a complex world. Geneva: TDR-ESSENCE on Health Research, 2014.
8. Volmink J, Dare L. Addressing inequalities in research capacity in Africa. *BMJ*. 2005;331(7519):705-6. doi: 10.1136/bmj.331.7519.705. PubMed PMID: 16195259; PubMed Central PMCID: PMC1239957.
9. UNDP. Technical advisory paper, No:2. New York: UNDP, 1999.
10. LaFond AK, Brown L, Macintyre K. Mapping capacity in the health sector: a conceptual framework. *The International journal of health planning and management*. 2002;17(1):3-22. doi: 10.1002/hpm.649. PubMed PMID: 11963442.
11. Haines A, Sanders D. Building capacity to attain the Millennium Development Goals. *Trans R Soc Trop Med Hyg*. 2005;99(10):721-6. doi: 10.1016/j.trstmh.2005.06.010. PubMed PMID: 16029880.
12. Gesellschaft für Internationale Zusammenarbeit (GIZ). Capacity works. The Management Model for Sustainable Development. Eschborn: Gesellschaft für Internationale Zusammenarbeit (GIZ), 2011.
13. Depart of Economic and Social Affairs. Capacity-building for poverty eradication: Analysis of, and lessons from, evaluations of UN system support to countries' efforts. New York: United Nations, 2002.
14. DFID. Research Programme Consortia: Guidance note on capacity development. London: DFID, 2009.
15. Watson R, Crawford M, Farley S. Strategic approaches to science and technology in development. Geneva: World Bank, 2003.

Supplementary Table 10. Content analysis of capacity definitions by capacity term<sup>1</sup>

| Subject Defined          | Capacity Term                                | Content Domains <sup>2</sup> |      |      |      |      |      |     |      |      |     |
|--------------------------|----------------------------------------------|------------------------------|------|------|------|------|------|-----|------|------|-----|
|                          |                                              | Ind.                         | Ins. | Env. | Def. | Car. | App. | Qua | Sus. | Pro. | Con |
| Health Research Capacity | Building [139]                               | x                            | x    |      |      |      |      | x   |      | x    |     |
| Health Research Capacity | Building [97]                                | x                            | x    |      |      |      |      |     | x    |      |     |
| Research Capacity        | Building [132]                               |                              |      |      |      | x    | x    |     |      |      |     |
| Research Capacity        | Building [91, 96]                            | x                            | x    |      |      | x    | x    | x   |      |      |     |
| Research Capacity        | Building [130]                               | x                            | x    | x    |      |      |      |     |      | x    | x   |
| Research Capacity        | Building [46]                                | x                            | x    | x    | x    | x    | x    | x   |      |      |     |
| Research Capacity        | Building [166]                               | x                            |      |      |      | x    |      | x   |      |      |     |
| Capacity                 | Building [25]                                | x                            | x    | x    |      |      |      |     | x    |      | x   |
| Capacity                 | Building [133]                               |                              | x    | x    |      |      | x    |     |      | x    |     |
| Capacity                 | Building [150]                               |                              | x    | x    |      |      |      |     | x    |      |     |
| Progress                 | Building [142], Development [143]            |                              |      |      |      | x    | x    |     |      |      |     |
| Health Research Capacity | Building [30], Strengthening [70]            | x                            | x    | x    |      | x    | x    |     | x    |      |     |
| Health Research Capacity | Building [166], Strengthening [74, 126]      |                              | x    |      | x    | x    |      |     | x    |      |     |
| Research Capacity        | Building [164], Strengthening [29, 123, 159] | x                            | x    | x    | x    | x    | x    |     |      | x    | x   |
| Health Research Capacity | Strengthening [123]                          |                              |      | x    |      |      |      |     | x    |      |     |
| Health Research Capacity | Strengthening [48]                           |                              |      |      |      | x    | x    |     |      |      |     |
| Research Capacity        | Strengthening [16, 72]                       | x                            | x    |      |      | x    |      | x   |      | x    |     |
| Research Capacity        | Strengthening [165]                          | x                            | x    |      |      | x    |      | x   |      |      |     |
| Research Capacity        | Strengthening [79]                           | x                            | x    | x    |      |      |      |     |      |      |     |
| Capacity                 | Strengthening [66]                           | x                            | x    | x    |      |      |      |     |      | x    |     |
| Capacity                 | Strengthening [65]                           | x                            | x    | x    |      |      |      | x   |      | x    |     |
| Capacity                 | Strengthening [47]                           | x                            |      |      |      | x    |      |     | x    |      |     |
| Research Capacity        | Development [4], Strengthening [31, 74]      | x                            | x    | x    | x    | x    | x    | x   | x    | x    |     |
| Health Research Capacity | Development [45]                             |                              | x    |      |      |      |      |     | x    |      | x   |
| Organisational Capacity  | Development [27]                             |                              | x    |      |      |      |      |     |      | x    |     |
| Progress                 | Building [142], Development [143]            |                              |      |      |      | x    | x    |     |      |      |     |

1. Numbered citations pertain to the reference list in Supplementary Table 1. 2. The content of each definition was independently coded according to the following criteria: explicit reference to individual (ind.), institutional (Ins.) or environmental (Env.) level capacity strengthening; explicit reference to strengthening capacity in terms of defining research questions or identifying research priorities (Def.), conducting research or applying research methods (Car.) or communicating and applying research outcomes

1  
2  
3 (App.); explicit reference to facilitating an improvement in research abilities/quality (Qua.) sustainability (Sus.), reference to HRCS as a process (Pro.) and/or HRCS as a  
4 continuous activity (Con.).  
5  
6  
7  
8  
9  
10  
11  
12  
13  
14  
15  
16  
17  
18  
19  
20  
21  
22  
23  
24  
25  
26  
27  
28  
29  
30  
31  
32  
33  
34  
35  
36  
37  
38  
39  
40  
41  
42  
43  
44  
45  
46  
47

For peer review only
