# Supplementary material for: Advancing the science of health research capacity strengthening in low-income and middle-income countries: a scoping review of the published literature, 2000–2016
Source: PubMed Central journal article supplement — BMJ Open. 2017 Dec 6;7(12):e018718. doi: 10.1136/bmjopen-2017-018718 (PMC5728300; doi:10.1136/bmjopen-2017-018718), 2017-12-06
Supplement: bmjopen-2017-018718supp001.pdf [file bmjopen-2017-018718supp001.pdf]

**Table S1. Supplementary and detailed data for 'learning and evaluation' (from research initiatives) original research publications**

| Publication         |      | Publication Characteristics |                        |                 | Programme Characteristics                                     |                                   |          |                                               | Global = 3+regions               |
|---------------------|------|-----------------------------|------------------------|-----------------|---------------------------------------------------------------|-----------------------------------|----------|-----------------------------------------------|----------------------------------|
| Author              | Year | LMIC Authorship             | Capacity Term          | HRCs Definition | Name                                                          | Type                              | Focus    | WHO Region                                    |                                  |
| Byrne et al         | 2016 | Co-author                   | Capacity Development   | Yes             | Development and delivery of a Masters programme               | Education                         | Nth-Sth  | Community Systems Health Research             | African                          |
| Aidam & Sombie      | 2016 | First, last                 | Capacity Development   | No              | West African Health Organisation research development program | Health research system            | Sth-Sth  | Health research                               | African                          |
| Cole et al          | 2016 | Co-author                   | Capacity Strengthening | No              | Malawi's Health research Capacity Strengthening Initiative    | health research system            | National | Health research                               | African                          |
| Elmusharaf et al    | 2016 | First. Co-author            | Capacity Development   | No              | Connecting health research in Africa and Ireland Consortium   | Education; collaborative research | Nth-Sth  | Health systems strengthening                  | African                          |
| Kaser et al         | 2016 | Nil                         | Capacity Strengthening | No              | WHO/TDR Career Development Fellowship Programme               | Placement                         | Nth-Sth  | Clinical research                             | Global                           |
| Abawi et al         | 2016 | Nil                         | Capacity Strengthening | No              | E-learning for RCS                                            | Education                         | Nth-Sth  | Sexual and reproductive health                | Global                           |
| Varshney et al      | 2016 | First, last, co-author      | Capacity Building      | No              | Asian Regional Capacity Development programme                 | Education; collaborative research | Nth-Sth  | Social determinants of health                 | South-East Asia; Western Pacific |
| Thomson et al       | 2016 | First, last, co-author      | Capacity Building      | No              | Applied statistical training to strengthen HRC                | Education                         | Nth-Sth  | Statistical training                          | African                          |
| Atkins et al        | 2016 | Co-author                   | Capacity Building      | No              | Africa/Asian Regional Capacity Development programme          | Education; collaborative research | Nth-Sth  | Health systems; Social determinants of health | Global                           |
| Protsiv & Atkins    | 2016 | Co-author                   | Capacity Building      | No              | Africa/Asian Regional Capacity Development programme          | Education; collaborative research | Nth-Sth  | Health systems; Social determinants of health | Global                           |
| Farnman et al       | 2016 | Co-author                   | Capacity Building      | No              | Africa/Asian Regional Capacity Development programme          | Education; collaborative research | Nth-Sth  | Health systems; Social determinants of health | Global                           |
| Protsiv et al       | 2016 | Co-author                   | Capacity Building      | No              | Africa Regional Capacity Development programme                | Education; collaborative research | Nth-Sth  | Health systems; Social determinants of health | Global                           |
| Mahendradhata et al | 2016 | First, last                 | Capacity Building      | No              | Good Health Research Practice training programme              | Education                         | Nth-Sth  | Good health research practice                 | Global                           |
| Daniels et al       | 2015 | Co-author                   | Capacity Building      | No              | AIDS International Training and Research Program              | Education                         | Nth-Sth  | HIV epidemiology and basic science            | African                          |
| Heller et al        | 2015 | Co-author                   | Capacity Building      | No              | People's Open Access Education Initiative, Peoples-uni        | Education                         | Nth-Sth  | Public health                                 | Global                           |

|                      |      |                        |                        |     |                                                         |                           |               |                                        |                          |
|----------------------|------|------------------------|------------------------|-----|---------------------------------------------------------|---------------------------|---------------|----------------------------------------|--------------------------|
| Agar & Zarowsky      | 2015 | Last                   | Capacity Strengthening | No  | Multiple HRCS initiatives (*)                           | NA                        | NA            | NA                                     | African                  |
| Dean et al           | 2015 | Nil                    | Capacity Strengthening | Yes | RCS Award Scheme (un-named)                             | Collaborative Research    | Nth-Sth       | Life and physical sciences             | African                  |
| Ndebele et al        | 2014 | First, co-author       | Capacity Building      | No  | FIC research ethics capacity building initiatives (*)   | Education                 | Nth-Sth       | Research ethics                        | African                  |
| Zachariah et al      | 2014 | Co-author              | Capacity Building      | No  | Structured Operational Research and Training Initiative | Education                 | Nth-Sth       | Operational research                   | Global                   |
| Saenz et al          | 2014 | Co-author              | Capacity Building      | No  | FIC bioethics training                                  | Education                 | Nth-Sth       | Research ethics                        | Americas                 |
| Miuro et al          | 2013 | First, co-author, last | Capacity Building      | No  | EDCTP Regional Networks of Excellence                   | Research collaboration    | Nth-Sth       | Clinical trials                        | African                  |
| Vian et al           | 2013 | Nil                    | Capacity Building      | Yes | Pfizer Global Health Fellows Program                    | Placement                 | Nth-Sth       | Global health                          | Global                   |
| Wilson et al         | 2013 | Nil                    | Capacity Building      | No  | Promoting Enhanced Research Capacity for Global Health  | Education                 | Nth-Sth       | Clinical research management           | Global                   |
| Bennett et al        | 2013 | Last, co-author        | Capacity Development   | No  | FIC research training programs(*)                       | Education                 | Nth-Sth       | Health research                        | African                  |
| Bennett et al        | 2013 | Last, co-author        | Capacity Development   | No  | FIC research training programs(*)                       | Education                 | Nth-Sth       | Health research                        | African                  |
| Marjanovic et al     | 2013 | Nil                    | Capacity Building      | No  | Africa Institutions initiative                          | Collaborative Research    | Nth-Sth       | Health research                        | African                  |
| Bennett et al        | 2012 | Last, co-author        | Capacity Development   | Yes | Health policy analysis institutes (*)                   | NA                        | NA            | NA                                     | Global                   |
| Redman-McLaren et al | 2012 | Co-author              | Capacity Strengthening | Yes | Introduction to Health Research Workshop                | Education                 | Nth-Sth       | Operational research                   | Western Pacific          |
| Bissell et al        | 2012 | Co-author              | Capacity Building      | No  | Int. Union Against TB & Lung Disease & MSF OR training  | Education                 | Nth-Sth       | Operational research                   | Global                   |
| Mahmood et al        | 2011 | First, co-author, last | Capacity Building      | Yes | Int. Centre for Diarrhoeal Disease Research, Bangladesh | Financial management      | Institutional | Research funding & perform. monitoring | South East Asia          |
| Minja et al          | 2011 | First                  | Capacity Strengthening | Yes | WHO/TDR Programmes (*)                                  | Education; Infrastructure | Nth-Sth       | Health research                        | Global                   |
| Goto et al           | 2010 | Last, co-author        | Capacity Development   | No  | Epidemiology training course for physicians             | Education                 | National      | Epidemiology research                  | Western Pacific          |
| Mayhew et al         | 2008 | Last, co-author        | Capacity Strengthening | No  | Health Economics & Financing Programme                  | Research collaboration    | Nth-Sth       | Health economics                       | African; South-East Asia |
| Jonsson et al        | 2007 | Co-author              | Capacity Development   | No  | Health systems research training programmes             | Collaborative Research    | Nth-Sth       | Health systems                         | Western Pacific          |
| Hyder et al          | 2003 | First, co-author, last | Capacity Development   | No  | Doctoral trainings grants (*)                           | Education                 | Nth-Sth       | Health research                        | Eastern Mediterranean    |
| Jentsch & Pilley     | 2003 | Nil                    | Capacity Building      | No  | Multinational research project                          | Collaborative research    | Nth-Sth       | Maternal and Child Health              | South East Asia          |

| Activities                                                                                                        | Learning & Evaluation Characteristics            |                                                      |                                                                                   |                                    |                       |
|-------------------------------------------------------------------------------------------------------------------|--------------------------------------------------|------------------------------------------------------|-----------------------------------------------------------------------------------|------------------------------------|-----------------------|
|                                                                                                                   | Objective                                        | Study Design                                         | Data Collection                                                                   | Sampling                           | Data Analysis         |
| Development and delivery of blended (largely web-based) Masters programme; teacher training (to support delivery) | Use of blended learning                          | Prospective; formative; mixed methods                | Online surveys (n=17); IDIs (n=11)                                                | Population                         | Thematic              |
| Research stewardship, financing, creating or sustaining resources, prod. Or using research & dev. partnerships    | Programme outputs; lessons learned               | Retrospective; formative; mixed methods              | Document review; IDIs (n=180); consultation                                       | Purposive                          | Thematic              |
| National priority setting, decision-making on funding, health research actor mobilisation                         | Lessons learned                                  | Retrospective; formative; mixed methods; independent | Document review; IDIs (n=30)                                                      | Purposive; random                  | Thematic              |
| PhD scholarship; capacity assessment; project specific capacity building and/or research activities               | Lessons learned                                  | Prospective; summative; qualitative                  | Reflection; document review                                                       | Convenience                        | Thematic              |
| 12-month placement at pharmaceutical company or PDP; administrative grant; networking                             | Programme outputs; outcomes; lessons learned     | Retrospective; summative; mixed methods              | Survey (n=33); IDIs                                                               | Population; purposive              | Descriptive; thematic |
| Online education                                                                                                  | Programme outputs; outcomes                      | Retrospective; summative; quantitative               | Online survey (n=175)                                                             | Population                         | Descriptive           |
| Short-term training; long-term training; joint research                                                           | Research partnerships                            | Prospective; formative; qualitative                  | IDIs (n=16)                                                                       | Population                         | Thematic              |
| Short-term training                                                                                               | Programme outcomes                               | Prospective; summative; quantitative                 | Surveys (n=14-20)                                                                 | Population                         | Descriptive           |
| Short-term training; long-term training; joint research                                                           | Use of blended learning                          | Prospective; summative; quantitative                 | Survey (n=82)                                                                     | Population                         | Inferential           |
| Short-term training; long-term training; joint research                                                           | Use of blended learning                          | Prospective; formative; qualitative                  | IDIs (n=11)                                                                       | Purposive                          | Thematic              |
| Short-term training; long-term training; joint research                                                           | Lessons learned                                  | Prospective; formative; mixed methods                | IDIs (n=16); document review                                                      | Population                         | Thematic              |
| Short-term training; long-term training; joint research                                                           | Use of blended learning                          | Prospective; formative; mixed methods                | Group discussion (n=3); participant observation (n=11); survey (n=18); IDIs (n=?) | Population; purposive; convenience | Descriptive; thematic |
| Short-term training                                                                                               | Lessons learned; programme outcomes              | Prospective; formative; mixed methods                | Course feedback (multiple methods; n=58); qualitative assessment                  | Population                         | Descriptive; thematic |
| Short-term training; long-term training (MS, MPH, PhD)                                                            | Transfer of a health research training programme | Retrospective; formative; qualitative                | IDIs (n=10)                                                                       | Purposive                          | Thematic              |
| Distance learning MPH                                                                                             | Alumni collaboration                             | Retrospective; formative; mixed methods              | Survey (n=68); online discussion forums                                           | Population; convenience            | Descriptive; thematic |

|                                                                                                                |                                              |                                                      |                                                   |                        |                       |
|----------------------------------------------------------------------------------------------------------------|----------------------------------------------|------------------------------------------------------|---------------------------------------------------|------------------------|-----------------------|
| NA                                                                                                             | Lessons learned                              | Prospective; formative; qualitative                  | Document review; reflection; consultation (n=37)  | Convenience            | Thematic              |
| Funding to support delivery of a collaborative research project                                                | Research partnerships                        | Retrospective; formative; mixed methods; independent | Online surveys (n=23); IDIs/FGDs (n=42)           | purposive; convenience | Descriptive; thematic |
| Training; mentorship; placements; web/electronic resources; public lectures, symposia; curriculum development  | Lessons learned                              | Retrospective; formative; mixed methods              | Survey (n=9); document review                     | Purposive              | Thematic              |
| Workshop                                                                                                       | Programme outputs; outcomes                  | Retrospective; summative; quantitative               | Document review; survey (n=88)                    | Population             | Descriptive           |
| Training (inclusive of certificate, diploma, masters) and fellowships                                          | Programme outputs; lessons learned           | Retrospective; formative; mixed methods              | Document review; survey; consultation             | Purposive              | Thematic              |
| Training; infrastructure development; research funding; research collaboration                                 | Programme outputs; lessons learned           | Retrospective; formative; mixed methods              | Direct observation; document review               | Convenience            | Descriptive; thematic |
| Training; technical assistance                                                                                 | Lessons learned                              | Retrospective; formative; qualitative; independent   | Document review; IDIs (n = 9)                     | Purposive              | Thematic              |
| Online continuing education course                                                                             | Programme outputs; outcomes; lessons learned | Prospective; summative; quantitative                 | Surveys (x4, n= 21-166)                           | Population             | Descriptive           |
| Training (Masters and PhD) and fellowships                                                                     | Mentorship                                   | Retrospective; formative; qualitative                | IDIs/FGDs (n=72)                                  | Purposive              | Thematic              |
| Training (Masters and PhD) and fellowships                                                                     | Programme outcomes                           | Retrospective; summative; mixed methods              | IDIs/FGDs (n=52); survey, (n=29); document review | Purposive; random      | Descriptive; thematic |
| Funding to support delivery of a collaborative research project. Funding to support advanced research training | Lessons learned                              | Prospective; formative; mixed methods; independent   | Document review; consultation; survey (n=51)      | Purposive              | Thematic              |
| NA                                                                                                             | Lessons learned                              | Retrospective; formative; mixed methods; independent | IDIs (n=80); document review                      | Purposive              | Descriptive; thematic |
| Workshop                                                                                                       | Workshop participation dynamics              | Retrospective; formative; qualitative                | IDIs (n=5); written responses (n=5)               | Purposive              | Thematic              |
| Workshop                                                                                                       | Programme outputs; lessons learned           | Retrospective; summative; quantitative               | Survey (n=12); document review                    | Population             | Descriptive           |
| Implementation of a revised funding and performance monitoring framework                                       | Programme outputs; outcomes                  | Retrospective; summative; mixed methods              | KII; document review; survey                      | Purposive              | Descriptive; thematic |
| Research training grants; research re-entry grants; institution strengthening grants                           | Programme outcomes                           | Retrospective; summative; mixed methods              | Survey (n=92); IDIs (n=10)                        | Population; purposive  | Descriptive; thematic |
| Workshop                                                                                                       | Programme outputs; outcomes                  | Prospective; summative; quantitative                 | Surveys (x2, n = 8-70)                            | Population             | Descriptive           |
| Joint research, publication & funding applications; staff exchanges/training; teaching & TA; small grants      | Programme outputs; lessons learned           | Retrospective; formative; mixed methods              | Document review; IDIs (n=25)                      | Purposive              | Descriptive; thematic |
| Training; funding to support delivery of a collaborative research project                                      | Informing policy and practice                | Retrospective; formative; mixed-methods              | IDIs/FGDs (n=28); survey (n=56)                   | Purposive              | Thematic              |
| Doctoral training                                                                                              | Programme outputs                            | Retrospective; summative; quantitative; independent  | Survey (n=54)                                     | Convenience            | Descriptive           |
| Funding to support delivery of a collaborative research project                                                | Research partnerships                        | Retrospective; formative; qualitative                | IDIs (n=7)                                        | purposive; convenience | Thematic              |

**Table S2. Supplementary and detailed data for 'Capacity Assessment' original research publications**

| Publication     |      | Publication Characteristics |                        |                 |                                                                                                                   |
|-----------------|------|-----------------------------|------------------------|-----------------|-------------------------------------------------------------------------------------------------------------------|
| Author          | Year | LMIC Authorship             | Capacity Term          | HRCS Definition | Assessment of                                                                                                     |
| Erasmus et al   | 2016 | First, co-author, last      | Capacity Strengthening | No              | Postgraduate teaching capacity                                                                                    |
| Uzochukwu et al | 2016 | First, co-author, last      | Capacity Building      | No              | Capacity needs for health systems policy and systems research and analysis                                        |
| Motari et al    | 2015 | First, co-author, last      | Capacity Strengthening | No              | Readiness of national ethics committees to respond to challenges posed by a globalised biomedical research system |
| Agyepong et al  | 2015 | First, co-author, last      | Capacity Strengthening | No              | Capacity needs for health policy and systems research and analysis, conduct and teaching                          |
| Oliver et al    | 2015 | Last                        | Capacity Strengthening | No              | Capacity for conducting systematic reviews                                                                        |
| Haafkens et al  | 2014 | Nil                         | Capacity Building      | No              | Training needs of researchers to conduct research                                                                 |
| Kilic et al     | 2014 | First, co-author, last      | Capacity Building      | Yes             | Research capacity and training needs                                                                              |
| Kebede et al    | 2014 | First, co-author            | Capacity Development   | Yes             | Human capacity and staff movement                                                                                 |

|                 |                             |                        |     |                                                                                |
|-----------------|-----------------------------|------------------------|-----|--------------------------------------------------------------------------------|
| Simba et al     | 2014 First, co-author, last | Capacity Strengthening | Yes | Human and financial resources capacities, policies and organisational support  |
| Ekeroma et al   | 2014 Nil                    | Capacity Building      | No  | Clinical research activity and audit                                           |
| Kanoute et al   | 2014 First, co-author       | Capacity Strengthening | No  | Current status of oral health research                                         |
| Franzen et al   | 2013 Co-author              | Capacity Strengthening | No  | Barriers and enablers to investigator-initiated trials                         |
| Mirzoev et al   | 2014 Last, co-author        | Capacity Strengthening | Yes | Capacity for health policy and systems research and analysis                   |
| Hofman et al    | 2013 First, co-author       | Capacity Building      | No  | Current status of health equity and Social Determinants of Health training     |
| Nachege et al   | 2012 First, co-author, last | Capacity Building      | No  | Epidemiology and public health capacity                                        |
| Paulus et al    | 2012 Co-author              | Capacity Development   | No  | Global training priorities, unmet needs and potential cross-cohort solutions   |
| Peykari et al   | 2012 First, co-author, last | Capacity Building      | No  | Health Systems Research – ranking of institutions                              |
| Magesa et al    | 2011 First, co-author, last | Capacity Building      | No  | Capacity building process of Tanzanian National Institute for Medical Research |
| Mohammadi et al | 2011 First, co-author, last | Capacity Building      | No  | Representation of different nations in international public health journals    |
| Nakanjaro et al | 2011 First, co-author, last | Capacity Building      | No  | Status and nature of mentoring practices                                       |

|                       |                             |                      |    |                                                                                  |
|-----------------------|-----------------------------|----------------------|----|----------------------------------------------------------------------------------|
| Pepping               | 2010 Nil (1)                | Capacity development | No | Training capacity in public health nutrition                                     |
| Redman-MacLaren et al | 2010 Co-author              | Capacity Building    | No | Public Health literature in Salomon Island                                       |
| Nyika et al           | 2009 First, co-author, last | Capacity Building    | No | Composition, training needs and independence of ethics committees                |
| Malekafzali et al     | 2009 First, co-author, last | Capacity Building    | No | Research activities in medical universities and their affiliated institutions    |
| Moodley & Myer        | 2007 First, last (2)        | Capacity Development | No | Composition, operations, and training needs of health research ethics committees |
| Singh                 | 2006 First (1)              | Capacity Development | No | Mental health research activities in LMICs                                       |
| Cuboni et al          | 2004 First, co-author, last | Capacity Development | No | Participation of Fijians in health research publications                         |

| Focus                                                   | Name of programme                                                     | Region | Assessment location/level                                                           | Study Design                   | Data Collection                                                                          | Data Analysis         |
|---------------------------------------------------------|-----------------------------------------------------------------------|--------|-------------------------------------------------------------------------------------|--------------------------------|------------------------------------------------------------------------------------------|-----------------------|
| Health systems policy and systems research and analysis | Consortium for Health Policy and Systems Analysis in Africa (CHEPSAA) | Africa | Multiple institutions involved in research (universities and research institutions) | Cross-sectional; mixed methods | Document review; surveys                                                                 | Descriptive; thematic |
| Health systems policy and systems research and analysis | CHEPSAA                                                               | Africa | University                                                                          | Cross-sectional; mixed methods | Document review; interviews (n=9); survey (n=123)                                        | Thematic              |
| Health research ethics                                  | N.A.                                                                  | Africa | Ethic committees (national level)                                                   | Cross-sectional; quantitative  | Survey (n=33)                                                                            | Descriptive           |
| Health systems policy and systems research and analysis | N.A.                                                                  | Africa | University                                                                          | Cross-sectional; mixed methods | Document review; interview (n=1); focus group discussions (n=3); survey (n=67)           | Descriptive; thematic |
| Systematic reviews                                      | N.A.                                                                  | Global | Multiple institutions involved in research (systematic review centres)              | Rapid appraisal; mixed methods | Routine management data; document review; consultation of key informants; surveys (n=22) | Descriptive; thematic |
| Causes of health inequities                             | INDEPTH Network                                                       | Global | Multiple institutions involved in research (research network)                       | Qualitative                    | Online concept mapping (n=82)                                                            | Descriptive thematic  |
| Non-Communicable Diseases research                      | RESCAP-Med                                                            | Europe | Multiple institutions involved in research                                          | Mixed methods                  | Literature review; interviews (n=10); Survey (n=46)                                      | Descriptive; thematic |
| National health research institutions                   | N.A.                                                                  | Africa | Multiple institutions involved in research (health research institutions )          | Quantitative                   | Surveys (n=847)                                                                          | Descriptive           |



|                                                            |                                                                                                        |                       |                                                                                            |                                |                                                                           |                       |
|------------------------------------------------------------|--------------------------------------------------------------------------------------------------------|-----------------------|--------------------------------------------------------------------------------------------|--------------------------------|---------------------------------------------------------------------------|-----------------------|
| Health systems research                                    | Higher Education Alliance for Leadership Through Health (HEALTH)                                       | Africa                | Universities                                                                               | Mixed methods                  | Document review; self-assessment (n=123); interviews (n=73)               | Descriptive; thematic |
| Reproductive health research                               | Building Reproductive health Research and Audit Capacity and Activity in the Pacific Islands (BRRACAP) | Western Pacific       | Health care providers                                                                      | Mixed methods                  | Interviews, questionnaires, focus group discussions; online survey (n=28) | Descriptive; thematic |
| Oral health research                                       | N.A.                                                                                                   | Africa                | National and regional level                                                                | Mixed methods                  | Delphi survey (n=30); literature review                                   | Descriptive; thematic |
| Informing and directing capacity strengthening initiatives | N.A.                                                                                                   | Africa                | Multiple institutions involved in research (research institute, university, NGO, hospital) | Qualitative                    | Interviews (n=7); focus group discussions (n=3)                           | Thematic              |
| Health systems policy and systems research and analysis    | CHEPSAA                                                                                                | Africa                | Universities                                                                               | Mixed methods                  | Document reviews; interviews; surveys                                     | Thematic              |
| Social Determinants of Health and health equity            | INDEPTH Training and research centres of Excellence (INTREC)                                           | Africa                | Universities (Schools of Public Health)                                                    | Qualitative                    | Document reviews; interviews (n=30), online searches                      | Thematic              |
| Training, research, funding, human resources               | N.A.                                                                                                   | Africa                | Regional level                                                                             | Qualitative                    | Interviews (n=10); literature review                                      | Descriptive; thematic |
| Cohort studies                                             | World Cohort Integration Workshop                                                                      | Global                | Regional level                                                                             | Mixed methods                  | Survey (n=42); FGDs (n=1)                                                 | Descriptive; thematic |
| Stewardship, capacity building, knowledge production       | N.A.                                                                                                   | Eastern Mediterranean | Universities                                                                               | Cross-sectional; quantitative  | Survey                                                                    | Descriptive           |
| Critical mass of multidisciplinary research scientists     | N.A.                                                                                                   | Africa                | Institute involved in research                                                             | Cross-sectional; mixed-methods | Document review; interviews (n=78)                                        | Descriptive; thematic |
| Equity in access to health research capacity development   | N.A.                                                                                                   | Global                | Regional level                                                                             | Qualitative                    | Review of health journals (n=37)                                          | Descriptive           |
| Effective mentoring                                        | N.A.                                                                                                   | Africa                | University                                                                                 | Qualitative                    | Survey (n=22)                                                             | Thematic              |

|                                                                   |                                        |                       |                                                                                   |               |                                                                            |                       |
|-------------------------------------------------------------------|----------------------------------------|-----------------------|-----------------------------------------------------------------------------------|---------------|----------------------------------------------------------------------------|-----------------------|
| Public health nutrition                                           | N.A.                                   | Africa                | Multiple institutions involved in research (research institutes and universities) | Mixed methods | Document review; survey (n=15); consultations; interviews; websites review | Descriptive; thematic |
| Equitable research agenda                                         | N.A.                                   | Western Pacific       | National level                                                                    | Qualitative   | Literature review (n=218); focus group (n=1)                               | Descriptive           |
| Capacity building programmes for effective ethic review processes | African Malaria Network Trust (AMANET) | Africa                | Ethic committees (national, institutional level)                                  | Quantitative  | Survey (n=312)                                                             | Descriptive           |
| Capacity building programmes for effective ethic review processes | N.A.                                   | Eastern Mediterranean | Multiple institutions involved in research (universities and research institutes) | Quantitative  | Bibliometric assay                                                         | Descriptive           |
| Biomedical research                                               | N.A.                                   | Africa                | Ethic committees (national level)                                                 | Mixed methods | Interviews; survey (n=12)                                                  | Descriptive; thematic |
| Publication bias                                                  | N.A.                                   | Global                | Regional level                                                                    | Quantitative  | Number of manuscripts submitted to 8 journals                              | Descriptive           |
| Health priorities and research capacity in Fiji                   | N.A.                                   | Western Pacific       | Regional level                                                                    | Mixed methods | Literature review (298 papers included); interviews                        | Descriptive; thematic |

**Table S3. Supplementary and detailed data for 'HRCS methods for implementation' original research publications**

| Publication  |      | Publication Characteristics |                        |                 | Programme Characteristics                                                                                |        |               |
|--------------|------|-----------------------------|------------------------|-----------------|----------------------------------------------------------------------------------------------------------|--------|---------------|
| Author       | Year | LMIC Authorship             | Capacity Term          | HRCS Definition | Focus                                                                                                    | Region | Study Design  |
| Murphy et al | 2015 | Co-author                   | Capacity Development   | No              | Partner assessment toolkit (PAT) to discuss partnership ethics and put accountability measures in place. | Global | Qualitative   |
| Le et al     | 2014 | Co-author                   | Capacity Strengthening | No              | Strengthening capacity for health policy and systems research and analysis (HPSR+A) in Universities.     | Africa | Mixed Methods |
| Huber et al  | 2014 | Co-author                   | Capacity Strengthening | Yes             | Training evaluation for training related to HRCS.                                                        | Africa | Quantitative  |

|               |                |                        |     |                                                                                                                                         |        |             |
|---------------|----------------|------------------------|-----|-----------------------------------------------------------------------------------------------------------------------------------------|--------|-------------|
| Jessani et al | 2014 Co-author | Capacity Development   | No  | Capacity assessment tool for schools of public health to reflect on institutional strengths and weaknesses for health systems research. | Africa | Qualitative |
| Bates et al   | 2014 Nil       | Capacity Strengthening | Yes | Development of a practical approach for the design and evaluation of health capacity strengthening programmes.                          | Africa | Qualitative |
| Birch et al   | 2013 Co-author | Capacity Building      | No  | North-South clinical nursing partnership for CS.                                                                                        | Africa | Qualitative |

|             |           |                   |     |                                                                                                                                             |        |             |
|-------------|-----------|-------------------|-----|---------------------------------------------------------------------------------------------------------------------------------------------|--------|-------------|
| Bates et al | 2006 Last | Capacity Building | Yes | Evidence based tool to determine infrastructural capabilities and design and evaluation of capacity building programmes in health research. | Africa | Qualitative |
|-------------|-----------|-------------------|-----|---------------------------------------------------------------------------------------------------------------------------------------------|--------|-------------|

| Data Collection                                                        | Data Analysis            | Steps in HRCS Process                                                                                                                                                                                                                                                                                                                                                                            | Methods Used in Process                                                                                                                                                                                |
|------------------------------------------------------------------------|--------------------------|--------------------------------------------------------------------------------------------------------------------------------------------------------------------------------------------------------------------------------------------------------------------------------------------------------------------------------------------------------------------------------------------------|--------------------------------------------------------------------------------------------------------------------------------------------------------------------------------------------------------|
| Stakeholder workshops situated around case studies and briefing papers | Thematic                 | <ol style="list-style-type: none"> <li>1. Common understanding of PAT components developed through workshops with sub-Saharan African partners.</li> <li>2. PAT modified by expert team and circulated to partners in all country contexts for comment.</li> <li>3. PAT finalised and tested in existing partnership.</li> </ol>                                                                 | <p>Qualitative joint self-assessment.<br/>Phased/developmental approach.</p> <p>Standardised</p>                                                                                                       |
| FGD, IDI, Stakeholder workshop, survey, document review                | Thematic and Descriptive | <ol style="list-style-type: none"> <li>1. Develop shared understanding of capacity and CS across consortium.</li> <li>2. Map contextual environment for HPSR+A, including desk review, and key informant interviews/discussions.</li> <li>3. Self-assessment against core thematic areas identified.</li> <li>4. Comparative synthesis by UK partner and cross-consortium comparison.</li> </ol> | <p>Mixed-method self-assessment by African partners and 'external' assessment by UK partner.</p> <p>Phased/developmental approach.</p> <p>'Semi-standardised' to allow for flexibility in context.</p> |
| Survey                                                                 | Inferential              | <ol style="list-style-type: none"> <li>1. Domains for evaluation selected based on existing framework.</li> <li>2. Development of questionnaire.</li> <li>3. Testing of questionnaire.</li> <li>4. Validation of questionnaire.</li> </ol>                                                                                                                                                       | <p>Quantitative self-survey.</p> <p>Fixed-point.</p> <p>Standardised</p>                                                                                                                               |

|                         |          |                                                                                                                                                                                                                                                                                                                                                                                                                       |                                                                                                                                                                                                           |
|-------------------------|----------|-----------------------------------------------------------------------------------------------------------------------------------------------------------------------------------------------------------------------------------------------------------------------------------------------------------------------------------------------------------------------------------------------------------------------|-----------------------------------------------------------------------------------------------------------------------------------------------------------------------------------------------------------|
| Stakeholder workshop    | Thematic | <ol style="list-style-type: none"> <li>1. Capacity assessment questions based on previous instruments but adapted for focus.</li> <li>2. Meeting with capacity focal points at universities to be assessed to refine tool to context.</li> <li>3. Implementation of tool.</li> <li>4. Dissemination and reflection on findings to develop capacity strengthening plan in workshop.</li> </ol>                         | <p>Quantitative self-assessment.</p> <p>Qualitative institutional profiling and priority identification.</p> <p>Phased/developmental.</p> <p>'Semi-standardised' to allow for flexibility in context.</p> |
| Review and case studies | Thematic | <ol style="list-style-type: none"> <li>1. Establish goal of capacity strengthening programme</li> <li>2. Describing ideal capacity to achieve goal- synthesis of relevant evidence</li> <li>3. Determination of existing capacity against 'ideal' identified in step 2.</li> <li>4. Devise and implement an action plan to fill gaps.</li> <li>5. Learn through doing and adapt the action plan regularly.</li> </ol> | <p>Mixed-method joint assessment and priority identification.</p> <p>Phased/developmental.</p> <p>'Semi-standardised' to allow for flexibility in context.</p>                                            |
| Review                  | Thematic | <ol style="list-style-type: none"> <li>1. Systematic literature search for partnership measures.</li> <li>2. Screening of partnership measures for applicability.</li> <li>3. Selection and modification of existing appropriate measure.</li> <li>4. Piloting of measure.</li> </ol>                                                                                                                                 | <p>Mixed-method self-assessment.</p> <p>Phased/developmental.</p> <p>Standardised.</p>                                                                                                                    |

|        |          |                                                                                                                                                                                                                                                                                                                                                                                        |                                                                                                                                                             |
|--------|----------|----------------------------------------------------------------------------------------------------------------------------------------------------------------------------------------------------------------------------------------------------------------------------------------------------------------------------------------------------------------------------------------|-------------------------------------------------------------------------------------------------------------------------------------------------------------|
| Review | Thematic | <ol style="list-style-type: none"> <li>1. Literature search for existing tools and models</li> <li>2. Using best practice examples to design the evaluation programme</li> <li>3. Develop and adapt an evaluation tool (links to QA cycle):<br/>define institutional systems needed to support research; enumerate existing and missing resources; address identified gaps.</li> </ol> | <p>Qualitative self-assessment and priority identification.</p> <p>Phased/developmental</p> <p>'Semi-standardised' to allow for flexibility in context.</p> |
|--------|----------|----------------------------------------------------------------------------------------------------------------------------------------------------------------------------------------------------------------------------------------------------------------------------------------------------------------------------------------------------------------------------------------|-------------------------------------------------------------------------------------------------------------------------------------------------------------|



**Table S4. Supplementary and detailed data for 'Evidence synthesis for RCS implementation and evaluation' original research publications**

| Publication   |      | Publication Characteristics |                        |                 | Programme Characteristics                                                                                                                                                                 |
|---------------|------|-----------------------------|------------------------|-----------------|-------------------------------------------------------------------------------------------------------------------------------------------------------------------------------------------|
| Author        | Year | LMIC Authorship             | Capacity Term          | HRCS Definition | Focus                                                                                                                                                                                     |
| Bates et al   | 2015 | Nil                         | Capacity Strengthening | No              | Enhance understanding in difficulties of evaluating health research capacity strengthening and make recommendations for improvement                                                       |
| Cole et al    | 2014 | Nil                         | Capacity Strengthening | Yes             | Describe the design of health research capacity strengthening evaluations, indicators, outputs and outcomes.                                                                              |
| Boyd et al    | 2013 | Nil                         | Capacity Strengthening | No              | Describe and compare key characteristics of existing health research capacity strengthening evaluation frameworks                                                                         |
| Gadsby        | 2011 | Nil                         | Capacity Strengthening | Yes             | Understand the way in which research capacity strengthening is understood and approached through examination of methods for monitoring and evaluation of research capacity strengthening. |
| Edwards et al | 2009 | Co-author                   | Capacity Building      | No              | Identification of factors that have influenced research capacity development amongst nurses in LMICs.                                                                                     |

---

| Region | Study Design  | Data Collection                                                  | Data Analysis | Participants/Target Group                             |
|--------|---------------|------------------------------------------------------------------|---------------|-------------------------------------------------------|
| Global | Qualitative   | Informal discussion and review                                   | Thematic      | HRCS Funders, evaluators and implementers             |
| Global | Qualitative   | Review                                                           | Thematic      | LMIC Health Research Funders                          |
| Global | Mixed methods | telephone discusion, stakeholder meetings, online survey, review | Thematic      | HRCS Funders, evaluators and implementers             |
| Global | Qualitative   | Review, informal discussions, semi-structured interview          | Thematic      | Donor Organisations and Experts in HRCS               |
| Global | Qualitative   | Review, informal interviews/discussions                          | Thematic      | Senior Nurse Leaders (HRCS Intervention Target Group) |

**Table S5. Supplementary and detailed data for 'miscellaneous' publications**

| <b>Publication</b> |      | <b>Publication Characteristics</b> |                        |                 |
|--------------------|------|------------------------------------|------------------------|-----------------|
| Author             | Year | LMIC Authorship                    | Capacity Term          | HRCS Definition |
| Cole et al         | 2016 | Last, co-author                    | Capacity Strengthening | No              |
| Parker & Kingori   | 2016 | Nil                                | Capacity Building      | No              |
| Muldoon et al      | 2012 | Co-author                          | Capacity Building      | No              |
| Nurse & Wight      | 2011 | First                              | Capacity Strengthening | Yes             |

| Aim                                                                                                                                                                         | Region | Study Design  | Data Collection            | Data Analysis |
|-----------------------------------------------------------------------------------------------------------------------------------------------------------------------------|--------|---------------|----------------------------|---------------|
| Mixed methods examination of mentorship experiences in Global Health                                                                                                        | Global | Mixed methods | Document review; case      | Thematic      |
| Qualitative examination of researcher's views on good and bad international research collaborations                                                                         | Global | Qualitative   | Interviews (n=22)          | Thematic      |
| Documenting North-South research collaborations and provide insights into ongoing benefits and challenges of engaging in the research process from the Southern perspective | Africa | Mixed methods | Surveys (n=19), Interview  | Thematic      |
| Analysing the political economy of health research commissioning among bilateral, multilateral, non-governmental and philanthropic organisations                            | Africa | Qualitative   | Document review; interview | Thematic      |

**Table S6. Supplementary and detailed data for 'Perspective, Opinion & Commentary' publications**

| Publication             |      | Publication Characteristics |                        |                 |
|-------------------------|------|-----------------------------|------------------------|-----------------|
| Author                  | Year | LMIC Authorship             | Capacity Term          | HRCS Definition |
| Airhihenbuwa et al      | 2016 | Nil                         | Capacity Building      | No              |
| Bloomfield et al        | 2016 | Last, co-author             | Capacity Building      | No              |
| Hyder et al             | 2016 | Last, co-author             | Capacity Strengthening | No              |
| Hawkes et al            | 2016 | Co-author                   | Capacity Strengthening | No              |
| Winchester et al        | 2016 | Co-author                   | Capacity Building      | No              |
| Dossou et al            | 2016 | First, co-author            | Capacity Strengthening | No              |
| Cubaka et al            | 2016 | First, co-author            | Capacity Building      | No              |
| Davies & Mullen         | 2016 | Nil                         | Capacity Building      | No              |
| Bloomfield et al        | 2016 | Nil                         | Capacity Building      | No              |
| Sturke et al            | 2016 | Nil                         | Capacity Building      | Yes             |
| Atkins et al            | 2016 | Last, co-author             | Capacity Building      | No              |
| Osanjo et al            | 2016 | First, co-author, last      | Capacity Building      | No              |
| Atkins et al            | 2016 | Co-author                   | Capacity Building      | No              |
| O'Connor et al          | 2016 | Co-author                   | Capacity Building      | No              |
| Berman et al            | 2015 | First, co-author, last      | Capacity Building      | No              |
| Cash-Gibson et al       | 2015 | Last, co-author             | Capacity Building      | Yes             |
| Koso-Thomas et al       | 2015 | Last                        | Capacity Building      | No              |
| MacLaren et al          | 2015 | Co-author                   | Capacity Building      | No              |
| Langlois et al          | 2015 | Co-author                   | Capacity Strengthening | No              |
| Miranda et al           | 2015 | First, co-author, last      | Capacity Building      | No              |
| Adanu et al             | 2015 | First, co-author            | Capacity Strengthening | No              |
| Cottler et al           | 2015 | Co-author                   | Capacity Building      | Yes             |
| McGregor et al          | 2015 | Nil                         | Capacity Building      | No              |
| Kombe                   | 2015 | First, co-author, last      | Capacity Strengthening | No              |
| Anderson et al          | 2014 | Last, co-author             | Capacity Building      | No              |
| Hanney & Gonzalez-Block | 2014 | Last (2)                    | Capacity Building      | No              |
| Cole et al              | 2014 | Nil                         | Capacity Strengthening | No              |
| Kabiru et al            | 2014 | First, co-author, last      | Capacity Building      | No              |
| Chu et al               | 2014 | Last, co-author             | Capacity Building      | No              |
| Sweetland et al         | 2014 | Co-author                   | Capacity Building      | No              |
| Adedokun et al          | 2014 | First, co-author, last      | Capacity Building      | No              |
| Harries et al           | 2014 | Co-author                   | Capacity Building      | No              |
| Carothers et al         | 2014 | Nil                         | Capacity Building      | No              |
| Klinkenberg et al       | 2014 | Last, co-author             | Capacity Building      | No              |
| Mandala et al           | 2014 | First, co-author, last      | Capacity Strengthening | No              |

|                        |      |                        |                        |     |
|------------------------|------|------------------------|------------------------|-----|
| Ramsay et al           | 2014 | Co-author              | Capacity Building      | No  |
| Pratt & Loff           | 2013 | Nil                    | Capacity Strengthening | No  |
| Noormahomed et al      | 2013 | First, co-author, last | Capacity Strengthening | No  |
| Sanchez et al          | 2013 | Last, co-author        | Capacity Strengthening | No  |
| Sanchez et al          | 2013 | Last, co-author        | Capacity Strengthening | No  |
| Shaji                  | 2013 | First (1)              | Capacity Building      | No  |
| Ekeroma                | 2013 | Nil                    | Capacity Building      | No  |
| Vasquez et al          | 2013 | Last, co-author        | Capacity Strengthening | Yes |
| Osei-Atweneboana et al | 2012 | First, co-author       | Capacity Building      | Yes |
| Ijsselmuiden et al     | 2012 | First, co-author, last | Capacity Strengthening | Yes |
| Mckee et al            | 2012 | Nil                    | Capacity Building      | No  |
| Nwaka et al            | 2012 | First, co-author, last | Capacity Building      | No  |
| Kasonde & Campbell     | 2012 | First                  | Capacity Building      | No  |
| Thornicroft et al      | 2012 | Last, co-author        | Capacity Building      | Yes |
| Pratt & Loff           | 2012 | Nil                    | Capacity Strengthening | No  |
| de-graft Aikins et al  | 2012 | First, co-author       | Capacity Building      | No  |
| Greenwood et al        | 2012 | Nil                    | Capacity Development   | No  |
| Airhihenbuwa et al     | 2011 | Last, co-author        | Capacity Building      | Yes |
| Farquhar et al         | 2011 | Last                   | Capacity Building      | No  |
| Forde et al            | 2011 | Last, co-author        | Capacity Development   | No  |
| Laabes et al           | 2011 | First, co-author       | Capacity Building      | No  |
| Kariuki et al          | 2011 | First, co-author       | Capacity Building      | No  |
| Pinto et al            | 2011 | Co-author              | Capacity Building      | No  |
| Wilson et al           | 2011 | Last                   | Capacity Building      | No  |
| Manabe et al           | 2011 | First, co-author, last | Capacity Building      | Yes |
| Gezmu et al            | 2011 | Co-author              | Capacity Building      | No  |
| Brown et al            | 2010 | First, co-author, last | Capacity Development   | No  |
| Kabiru et al           | 2010 | First, co-author, last | Capacity Development   | Yes |
| Ezeh et al             | 2010 | First, co-author, last | Capacity Building      | Yes |
| Lazarus et al          | 2010 | Last                   | Capacity Development   | No  |
| Kutcher et al          | 2010 | Last, co-author        | Capacity Building      | No  |
| Maher et al            | 2010 | First, co-author, last | Capacity Strengthening | No  |
| Ntoumi                 | 2010 | First (1)              | Capacity Building      | No  |
| Zumla et al            | 2010 | First, co-author, last | Capacity Development   | No  |
| Kilama                 | 2009 | First (1)              | Capacity Building      | Yes |
| Kilama                 | 2009 | First (1)              | Capacity Building      | No  |
| Coloma & Harris        | 2009 | Nil                    | Capacity Building      | No  |
| Hussein                | 2008 | First (1)              | Capacity Building      | No  |
| Kumar et al            | 2008 | First, co-author, last | Capacity Building      | No  |
| Malomo et al           | 2008 | First, co-author, last | Capacity Building      | No  |

|                     |      |                        |                        |     |
|---------------------|------|------------------------|------------------------|-----|
| Sheikh              | 2008 | First (1)              | Capacity Building      | No  |
| Tindana & Boateng   | 2008 | First, last (2)        | Capacity Building      | No  |
| Upshar              | 2008 | Nil (1)                | Capacity Building      | No  |
| Whitworth et al     | 2008 | Last, co-author        | Capacity Strengthening | No  |
| Schulz-Baldes et al | 2007 | Nil                    | Capacity Building      | No  |
| Nuyens              | 2007 | Nil                    | Capacity Strengthening | Yes |
| Stillman et al      | 2006 | Co-author              | Capacity Building      | No  |
| Goto et al          | 2005 | First, co-author, last | Capacity Building      | No  |
| Andruchow et al     | 2004 | Nil                    | Capacity Building      | No  |
| Lansang & Dennis    | 2004 | First,last (2)         | Capacity Building      | Yes |
| Reddy et al         | 2002 | First, last            | Capacity Building      | Yes |
| Varkevisser et al   | 2001 | Nil                    | Capacity Building      | No  |
| Nchinda             | 2002 | Nil                    | Capacity Strengthening | Yes |

---

**Commentary Content**

| HRCS Focus                                                                    | Commentary Purpose                                        | Commentary Informed By        |
|-------------------------------------------------------------------------------|-----------------------------------------------------------|-------------------------------|
| HRCS leadership development                                                   | Recommendations                                           | Experience                    |
| Global health centres of excellence training programme                        | Programme outputs; lessons learned                        | Experience (single programme) |
| Road traffic injuries research network                                        | Programme description; programme outputs                  | Experience (single programme) |
| Capacity development for evidence uptake                                      | Lessons learned                                           | Experience; review            |
| Development of a global health network                                        | Programme description; lessons learned                    | Experience (single programme) |
| Implementing a sexual and reproductive health network in Africa               | Programme description; lessons learned                    | Experience (single programme) |
| Twinning' model for PhD students                                              | Programme description; lessons learned                    | Experience (single programme) |
| HRCS funding for Africa                                                       | Advocacy                                                  | Experience (single programme) |
| Capacity building in Global Health research                                   | Lessons learned                                           | Experience (single programme) |
| NIH International Tobacco and Health Research and Capacity Building Programme | Programme description; lessons learned                    | Experience (single programme) |
| Online journal clubs for student mentoring                                    | Programme description; lessons learned                    | Experience (single programme) |
| Implementation science research training fellowship                           | programme description; programme outputs; lessons learned | Experience (single programme) |
| Africa/Asian Regional Capacity Development programme                          | Programme description; lessons learned                    | Experience (single programme) |
| capacity development in nursing informatics                                   | Programme description; lessons learned                    | Experience (single programme) |
| Development of a knowledge translation platform                               | Lessons learned                                           | Experience (single programme) |
| Sth-Nth-Sth research collaboration network                                    | Lessons learned                                           | Experience (single programme) |
| Global network for women and children's health research                       | Programme outputs; lessons learned                        | Experience (single programme) |
| Introduction to health research workshop                                      | Lessons learned                                           | Experience (single programme) |
| Health systems research synthesis in LMICs                                    | Programme description                                     | Experience (single programme) |
| Translational research in NCDs                                                | Programme description                                     | Experience (single programme) |
| HRCS in sexual and reproductive health in Africa                              | Recommendations                                           | Workshops                     |
| HRCS for brain and nervous system disorders research                          | Recommendations                                           | Experience; review            |
| Bibliometric analysis of authorship HIV treatment/prevention publications     | Analysis of LMIC authorship                               | Review                        |
| Field worker capacity strengthening in Africa                                 | Recommendations                                           | Workshops                     |
| Creating a charter of collaboration for HRCS partnerships                     | Process description                                       | Experience (single programme) |
| Building health research systems                                              | Situation analysis                                        | Review                        |
| HRCS evaluation approaches                                                    | Recommendations                                           | Review                        |
| African doctoral dissertation research fellowships                            | Programme outputs; lessons learned                        | Experience (single programme) |
| HRCS in Africa                                                                | Recommendations                                           | Not stated                    |
| Mental health research capacity in Mozambique                                 | Programme description                                     | Experience (single programme) |
| Consortium for advanced research training in Africa                           | Programme outputs; lessons learned                        | Experience (single programme) |
| Mentorship for operational research capacity building                         | Lessons learned                                           | Experience (single programme) |
| FIC clinical research scholars and fellows programme                          | Lessons learned                                           | Experience (single programme) |
| Ethiopian operational research initiative                                     | Programme outputs; lessons learned                        | Experience (single programme) |
| Southern Africa consortium for research excellence                            | Programme description                                     | Experience (single programme) |



|                                                                         |                                                        |                                       |
|-------------------------------------------------------------------------|--------------------------------------------------------|---------------------------------------|
| Operational research training initiative                                | Programme outputs; lessons learned                     | Experience (single programme)         |
| Contribution of product development partnerships to RCS                 | Programme outputs                                      | Review                                |
| Medical education partnership                                           | Programme outputs; lessons learned                     | Experience (single programme)         |
| Multi-faceted Nth-Sth HRCS project                                      | Programme description                                  | Experience (single programme)         |
| Multi-faceted Nth-Sth HRCS project                                      | Lessons learned                                        | Experience (single programme)         |
| HRCS in mental health research                                          | Recommendations                                        | Not stated                            |
| Building reproductive health research and audit capacity in the Pacific | Programme description                                  | Experience (single programme)         |
| HRCS                                                                    | Recommendations                                        | Experience (single programme); review |
| HRCS for helminthiasis control                                          | Recommendations                                        | Experience                            |
| Developing human resources for health research                          | Recommendations                                        | Review                                |
| HRCS in LMICs                                                           | Recommendations                                        | Review                                |
| Identification of centres of excellence in health innovation in Africa  | Programme description                                  | Experience (single programme)         |
| Creating a knowledge translation platform in Zambia                     | Lessons learned                                        | Experience (single programme)         |
| HRCS in global mental health research                                   | Recommendations                                        | Experience                            |
| Promotion of justice in global health research                          | Recommendations                                        | Not stated                            |
| Nth-Sth research partnership on chronic disease                         | Programme outputs; lessons learned                     | Experience (single programme)         |
| Gates malaria partnership                                               | Programme outputs; lessons learned                     | Experience (single programme)         |
| Nth-Sth RCS partnership                                                 | Lessons learned                                        | Experience (single programme)         |
| Afya-Bora consortium                                                    | Programme description                                  | Experience (single programme)         |
| Nth-Sth multi-faceted research collaboration                            | Programme outputs; lessons learned                     | Experience (single programme)         |
| HRCS for biomedical research                                            | Recommendations                                        | Not stated                            |
| HRCS for NTD control in Africa                                          | Recommendations                                        | Workshops                             |
| Development of international research partnerships                      | Lessons learned                                        | Experience (single programme)         |
| NTD collaborative teaching and learning                                 | Programme description                                  | Experience (single programme)         |
| PhD training in Africa                                                  | Programme description                                  | Experience (single programme)         |
| Strengthening biostatistics resources in Africa                         | Deliberations                                          | Workshops                             |
| Public health nutrition research and training capacity in Africa        | Deliberations                                          | Workshops                             |
| African doctoral dissertation research fellowships                      | Lessons learned                                        | Experience (single programme)         |
| Consortium for advanced research training in Africa                     | Programme description                                  | Experience (single programme)         |
| HRCS in Africa                                                          | Recommendations                                        | Experience; review                    |
| Nth-Sth clinical research development project                           | Programme outputs; programme outcomes; lessons learned | Experience (single programme)         |
| ALPHA network programme of HIV epidemiology workshops                   | Programme outputs; lessons learned                     | Experience (single programme)         |
| HRCS in Africa                                                          | Programme description(s)                               | Experience                            |
| Nth-Sth research collaboration                                          | Programme outputs; lessons learned                     | Experience (single programme)         |
| Research translation                                                    | Recommendations                                        | Not stated                            |
| HRCS in Africa                                                          | Situation analysis                                     | Review                                |
| HRCS in LMICs                                                           | Programme description                                  | Experience (single programme)         |
| FIC sponsored bioethics MHSc                                            | Lessons learned                                        | Experience (single programme)         |
| FIC sponsored bioethics MHSc                                            | Lessons learned                                        | Experience (single programme)         |
| FIC sponsored bioethics MHSc                                            | Lessons learned                                        | Experience (single programme)         |

|                                                         |                                                        |                               |
|---------------------------------------------------------|--------------------------------------------------------|-------------------------------|
| FIC sponsored bioethics MHSc                            | Lessons learned                                        | Experience (single programme) |
| FIC sponsored bioethics MHSc                            | Lessons learned                                        | Experience (single programme) |
| FIC sponsored bioethics MHSc                            | Programme description                                  | Experience (single programme) |
| HRCS in Africa                                          | Recommendations                                        | Not stated                    |
| Benefit sharing in international health research        | Recommendations                                        | Not stated                    |
| 10 best resources for HRCS                              | Recommendations                                        | Not stated                    |
| FIC tobacco HRCS programme                              | Lessons learned                                        | Experience (single programme) |
| Reproductive health research in-service training course | Programme outputs; programme outcomes; lessons learned | Experience (single programme) |
| Cancer training and research collaboration              | Lessons learned                                        | Experience (single programme) |
| HRCS in LMICs                                           | Recommendations                                        | Review                        |
| Nth-Sth research collaboration                          | Lessons learned                                        | Experience (single programme) |
| Nth-Sth joint health systems research project           | Programme outputs; lessons learned                     | Experience (single programme) |
| HRCS in LMICs                                           | Recommendations                                        | Experience                    |

**Table S7. Supplementary and detailed data for 'systematic review' publications**

| <b>Publication</b>     |      | <b>Publication Characteristics</b> |                        |                 |                                                                                                                                               |
|------------------------|------|------------------------------------|------------------------|-----------------|-----------------------------------------------------------------------------------------------------------------------------------------------|
| Author                 | Year | LMIC Authorship                    | Capacity Term          | HRCS Definition | Aim                                                                                                                                           |
| Adedokun et al         | 2016 | First                              | Capacity Building      | No              | Examine author affiliations of genomic epidemiology publications                                                                              |
| Mugabo et al           | 2015 | First, co-author, last             | Capacity Strengthening | No              | Describe different training approaches to research capacity strengthening                                                                     |
| Huber et al            | 2015 | Nil                                | Capacity Development   | No              | Support researchers and stakeholders in systemising future efforts in the HRDC field                                                          |
| Gonzalez-Block et al   | 2011 | First, co-author                   | Capacity Strengthening | No              | Assess the capacity of research collaborations and implementation research in strengthening networks and institutions in developing countries |
| San Sebastian & Hurtig | 2006 | Nil                                | Capacity Building      | No              | Review of health research on indigenous populations in Latin America between 1995-2004                                                        |

| Region   | Searched databases                                                                                     | Search terms                                                                                                                                                                                                                                                                                                                                                                                                           | Final no. of reviewed papers |
|----------|--------------------------------------------------------------------------------------------------------|------------------------------------------------------------------------------------------------------------------------------------------------------------------------------------------------------------------------------------------------------------------------------------------------------------------------------------------------------------------------------------------------------------------------|------------------------------|
| Africa   | Humane Genome Epidemiology (HuGE) Pub                                                                  | Sub-Saharan Africa                                                                                                                                                                                                                                                                                                                                                                                                     | 508                          |
| Africa   | PubMed                                                                                                 | Capacity building; building capacity; capacity strengthening; strengthening capacity; capacity development; skills development; research; building research capacity; research training; operational research training; health; Africa                                                                                                                                                                                 | 14                           |
| Global   | PubMed; Google Scholar                                                                                 | Capacity development; research; health professuin fields; monitoting and evaluation; level of needs assessment, monitoring and evaluation                                                                                                                                                                                                                                                                              | 42                           |
| Global   | PubMed; African Index Medicus; Literatura Latinoamericana y del Caribe En Ciencia de la Salud (LILACS) | Translational research; operations research; community based participatory research; process assessment; health plan implementation; government programmes; national health programmes; efficiency organisational; patient acceptance of health care; health service accessibility; reproductive health services; disease and health conditions; communicable diseases; malnutrition; malnutrition; maternal mortality | 237                          |
| Americas | PubMed and LILACS                                                                                      | Indian; indigenous; aboriginal; native; amazon and all the different countries of Latin America                                                                                                                                                                                                                                                                                                                        | 690                          |
